# Supplementary material for: Liberties and Partisanship under Straining US-China Relations
Source: publisher site journal article supplement (doi:10.1515/spp-2025-0047), 2025-12-13
Supplement: Supplementary file 1 [file TASS---Wave-1---October-2023.pdf › suppmaterials_threats/TASS---Wave-1---October-2023.pdf]

# TASS - Wave 1 - October 2023

Sample 3281 U.S. Adults  
Conducted October 16 - 24, 2023

## Table of Contents

|                 |                                          |    |
|-----------------|------------------------------------------|----|
| gender4         | Gender - 4 categories                    | 2  |
| birthyr         | Birth Year                               | 2  |
| age             | Age                                      | 2  |
| age4            | Age - 4 categories                       | 2  |
| race            | Race - 7 categories                      | 3  |
| race4           | Race - 4 categories                      | 3  |
| hispanic        | Hispanic                                 | 3  |
| educ            | Educational Attainment                   | 4  |
| educ4           | Education - 4 categories                 | 4  |
| educ2           | Education - 2 categories                 | 4  |
| region          | Region                                   | 5  |
| inputzip        | Zip Code                                 | 5  |
| votereg         | Voter Registration Status                | 5  |
| votereg2        | Voter Registration Status - 2 categories | 6  |
| turnout22post   | 2022 Turnout                             | 6  |
| housevote22post | House Vote Post 2022                     | 6  |
| turnout20post   | 2020 Turnout                             | 7  |
| presvote20post  | 2020 President Vote Post Election        | 7  |
| newsint         | Political Interest                       | 7  |
| ideo5           | Ideology - 5 categories                  | 8  |
| ideo3           | Ideology - 3 categories                  | 8  |
| faminc          | Family Income                            | 8  |
| employ          | Employment                               | 9  |
| employ_t        | Employment Status - open                 | 9  |
| marstat         | Marital Status                           | 9  |
| child18         | Children Under 18                        | 10 |
| urbancity       | Area Type                                | 10 |
| ownrent         | Own or Rent Home                         | 10 |
| pew_religimp    | Importance of Religion                   | 11 |
| pew_churatd     | Church Attendance                        | 11 |
| pew_bornagain   | Born Again                               | 11 |
| pew_prayer      | Prayer Frequency                         | 12 |
| religpew        | Affiliation                              | 12 |
| inputstate      | State of Residence                       | 13 |
| pid3            | Party ID - 3 categories                  | 13 |
| pid7            | Party ID - 7 categories                  | 13 |
| pid7_baseline   | Baseline 7 Point Party ID - November 1   | 14 |
| pid3_baseline   | Baseline 3 Point Party ID - November 1   | 14 |
| A1              | Actively Seek out News and Information   | 14 |
| A2              | Trust the News - Report Fairly           | 15 |
| A3              | Trust the News - Report Accurately       | 15 |
| A4              | Trusted News Website                     | 15 |
| A5              | Most Important Problem                   | 16 |
| B1              | Most Likely - Newsom                     | 16 |
| B2              | Most Likely - Trump and Arizona          | 16 |
| B3              | Most Likely - Judge Cannon               | 17 |
| B4              | Most Likely - Missouri State Senators    | 17 |

# TASS - Wave 1 - October 2023

|                           |                                                                              |    |
|---------------------------|------------------------------------------------------------------------------|----|
| B5                        | Most Likely - Trump and 2024 . . . . .                                       | 17 |
| C1                        | Area of Residence . . . . .                                                  | 18 |
| C2                        | Rural Areas . . . . .                                                        | 19 |
| C3                        | Qualities of Residence . . . . .                                             | 20 |
| D1                        | Race and Racism . . . . .                                                    | 21 |
| scale_piping              | Democrat or Republican for Scale Questions - Version 1 . . . . .             | 22 |
| alt_scale_piping          | Democrat or Republican for Scale Questions - Version 2 . . . . .             | 22 |
| scale_piping_2            | Democrat or Republican for Scale Questions - Version 3 . . . . .             | 22 |
| alt_scale_piping_2        | Democrat or Republican for Scale Questions - Version 4 . . . . .             | 23 |
| E1                        | Scale - Polling Stations . . . . .                                           | 23 |
| E2                        | Scale - Governors and Court Rulings . . . . .                                | 23 |
| E3                        | Scale - Governors and Journalists . . . . .                                  | 23 |
| E4                        | Scale - Accept Election Results . . . . .                                    | 24 |
| E1_dk_flag                | Scale - Polling Stations - Don't Know . . . . .                              | 24 |
| E2_dk_flag                | Scale - Governors and Court Rulings - Don't Know . . . . .                   | 24 |
| E3_dk_flag                | Scale - Governors and Journalists - Don't Know . . . . .                     | 24 |
| E4_dk_flag                | Scale - Accept Election Results - Don't Know . . . . .                       | 25 |
| F1t_1                     | Rating Politicians – Chris Christie . . . . .                                | 25 |
| F1t_2                     | Rating Politicians – Ron DeSantis . . . . .                                  | 25 |
| F1t_3                     | Rating Politicians – Nikki Haley . . . . .                                   | 25 |
| F1t_4                     | Rating Politicians – Mike Pence . . . . .                                    | 26 |
| F1t_5                     | Rating Politicians – Vivek Ramaswamy . . . . .                               | 26 |
| F1t_6                     | Rating Politicians – Tim Scott . . . . .                                     | 26 |
| F1t_7                     | Rating Politicians – Donald Trump . . . . .                                  | 26 |
| F1t_8                     | Rating Politicians – Joe Biden . . . . .                                     | 27 |
| F2                        | Voted in Presidential Primary Election . . . . .                             | 27 |
| F3                        | Republican Candidate with Best Chance . . . . .                              | 28 |
| F3_t                      | Republican Candidate with Best Chance - Other . . . . .                      | 28 |
| F4                        | Primary Election Vote . . . . .                                              | 29 |
| F4_t                      | Primary Election Vote - Other . . . . .                                      | 29 |
| F5                        | Candidate with Best Chance . . . . .                                         | 30 |
| F5_t                      | Candidate with Best Chance - Other . . . . .                                 | 30 |
| battery_ab_randomizati... | Randomization for Battery A or B . . . . .                                   | 30 |
| G1                        | Battery A - Woman and Power . . . . .                                        | 31 |
| G2                        | Battery A - Woman Should be Cherished . . . . .                              | 31 |
| G3                        | Battery A - Woman Exaggerate . . . . .                                       | 32 |
| G4                        | Battery B - Describe Men . . . . .                                           | 32 |
| G5                        | Battery B - Describe Women . . . . .                                         | 33 |
| G6                        | Battery B - Describe the President . . . . .                                 | 34 |
| G7                        | Importance of Women in Political Office . . . . .                            | 35 |
| G8                        | Support Corporations Reducing Gender Gaps . . . . .                          | 36 |
| vignette_randomization... | Randomization for Vignettes . . . . .                                        | 36 |
| H1                        | U.S. Should Ban Social Media Platforms . . . . .                             | 37 |
| H2                        | U.S. Should Inspect Social Media Content . . . . .                           | 37 |
| H3                        | U.S. Should Prosecute Foreign Software . . . . .                             | 38 |
| H4                        | Americans with Foreign Government Ties Should not be Eligible for... . . . . | 38 |
| H5                        | President and the Supreme Court on National Security . . . . .               | 39 |
| H6                        | U.S. Should Limit Immigration from Unfriendly Nations . . . . .              | 39 |
| sample                    | The Sample of the Respondent . . . . .                                       | 40 |
| starttime                 | Questionnaire Start Time . . . . .                                           | 40 |
| endtime                   | Questionnaire End Time . . . . .                                             | 40 |
| lastmodified              | Questionnaire Last Modified Time . . . . .                                   | 40 |
| pulse_member              | Pulse Member . . . . .                                                       | 41 |

## TASS - Wave 1 - October 2023

|                 |                                           |    |
|-----------------|-------------------------------------------|----|
| weight          | Weight . . . . .                          | 41 |
| ID              | Unique ID . . . . .                       | 41 |
| voterstatus     | Voter Status . . . . .                    | 41 |
| g2020           | Vote Method - 2020 General . . . . .      | 42 |
| g2022           | Vote Method - 2022 General . . . . .      | 42 |
| p2020           | Vote Method - 2020 Primary . . . . .      | 43 |
| p2022           | Vote Method - 2022 Primary . . . . .      | 43 |
| p2020_party     | Party - 2020 Primary . . . . .            | 44 |
| p2022_party     | Party - 2022 Primary . . . . .            | 44 |
| vb.vf_reg_state | Voter Registration State . . . . .        | 44 |
| partyreg        | Party Registration . . . . .              | 45 |
| matchstatus     | Match Status . . . . .                    | 45 |
| Appendix 1      | faminc – Family Income . . . . .          | 46 |
| Appendix 2      | inputstate – State of Residence . . . . . | 47 |
| vb.vf_reg_state | Voter Registration State . . . . .        | 48 |

# TASS - Wave 1 - October 2023

## Gender - 4 categories

Categorical

gender4

Are you... ?

| Code | Label  | Count |
|------|--------|-------|
| 1    | Male   | 1406  |
| 2    | Female | 1875  |

## Birth Year

Numeric

birthyr

In what year were you born?

| Mean    | SD | Min  | Max  | n    | Missing |
|---------|----|------|------|------|---------|
| 1974.85 | 18 | 1932 | 2005 | 3281 | 0       |

## Age

Numeric

age

What is your age?

*Derived from birth year*

| Mean  | SD | Min | Max | n    | Missing |
|-------|----|-----|-----|------|---------|
| 47.98 | 18 | 18  | 91  | 3281 | 0       |

## Age - 4 categories

Categorical

age4

Respondent age by category

| Code | Label    | Count |
|------|----------|-------|
| 1    | Under 30 | 734   |
| 2    | 30-44    | 700   |
| 3    | 45-64    | 1151  |
| 4    | 65+      | 696   |

# TASS - Wave 1 - October 2023

## Race - 7 categories

race

Categorical

What racial or ethnic group best describes you?

| Code | Label             | Count |
|------|-------------------|-------|
| 1    | White             | 1385  |
| 2    | Black             | 1350  |
| 3    | Hispanic          | 325   |
| 4    | Asian             | 70    |
| 5    | Native American   | 35    |
| 6    | Two or more races | 58    |
| 7    | Other             | 43    |
| 8    | Middle Eastern    | 15    |

## Race - 4 categories

race4

Categorical

What racial or ethnic group best describes you?

| Code | Label    | Count |
|------|----------|-------|
| 1    | White    | 1329  |
| 2    | Black    | 1350  |
| 3    | Hispanic | 411   |
| 4    | Other    | 191   |

## Hispanic

hispanic

Categorical

Are you of Spanish, Latino, or Hispanic origin or descent?

| Code | Label | Count |
|------|-------|-------|
| 1    | Yes   | 411   |
| 2    | No    | 2870  |

# TASS - Wave 1 - October 2023

## Educational Attainment

educ

Categorical

What is the highest level of education you have completed?

| Code | Label                | Count |
|------|----------------------|-------|
| 1    | No HS                | 162   |
| 2    | High school graduate | 1024  |
| 3    | Some college         | 683   |
| 4    | 2-year               | 398   |
| 5    | 4-year               | 638   |
| 6    | Post-grad            | 376   |

## Education - 4 categories

educ4

Categorical

What is the highest level of education you have completed?

| Code | Label        | Count |
|------|--------------|-------|
| 1    | HS or less   | 1186  |
| 2    | Some college | 1081  |
| 3    | College grad | 638   |
| 4    | Postgrad     | 376   |

## Education - 2 categories

educ2

Categorical

What is the highest level of education you have completed?

| Code | Label             | Count |
|------|-------------------|-------|
| 1    | No college degree | 2267  |
| 2    | College grad      | 1014  |

# TASS - Wave 1 - October 2023

## Region

Categorical

region

In which census region do you live?

| Code | Label     | Count |
|------|-----------|-------|
| 1    | Northeast | 593   |
| 2    | Midwest   | 620   |
| 3    | South     | 1447  |
| 4    | West      | 621   |

## Zip Code

Numeric

inputzip

What is the zip code where you live?

| Mean     | SD       | Min   | Max      | n    | Missing |
|----------|----------|-------|----------|------|---------|
| 4.89e+04 | 2.87e+04 | 1e+03 | 9.99e+04 | 3281 | 0       |

## Voter Registration Status

Categorical

votereg

Are you registered to vote?

| Code | Label      | Count |
|------|------------|-------|
| 1    | Yes        | 2412  |
| 2    | No         | 770   |
| 3    | Don't know | 98    |
| 8    | skipped    | 1     |

# TASS - Wave 1 - October 2023

## Voter Registration Status - 2 categories

votereg2

Categorical

Are you registered to vote?

| Code | Label          | Count |
|------|----------------|-------|
| 1    | Registered     | 2412  |
| 2    | Not registered | 868   |
| 9    | not asked      | 1     |

## 2022 Turnout

turnout22post

Categorical

Did you vote in the November 2022 general election?

| Code | Label | Count |
|------|-------|-------|
| 1    | Yes   | 1984  |
| 2    | No    | 1297  |

## House Vote Post 2022

housevote22post

Categorical

In the 2022 elections for U.S. House of Representatives, who did you vote for in the district where you live?

| Code | Label                       | Count |
|------|-----------------------------|-------|
| 1    | Democratic candidate        | 1237  |
| 2    | Republican candidate        | 607   |
| 3    | Independent candidate       | 56    |
| 5    | Other candidate             | 41    |
| 6    | Did not vote for U.S. House | 1340  |



# TASS - Wave 1 - October 2023

## 2020 Turnout

turnout20post

Categorical

Did you vote in the November 2020 general election?

| Code | Label   | Count |
|------|---------|-------|
| 1    | Yes     | 2024  |
| 2    | No      | 1255  |
| 8    | skipped | 2     |

## 2020 President Vote Post Election

presvote20post

Categorical

Who did you vote for in the election for President in 2020?

| Code | Label                      | Count |
|------|----------------------------|-------|
| 1    | Joe Biden                  | 1311  |
| 2    | Donald Trump               | 631   |
| 3    | Jo Jorgensen               | 17    |
| 4    | Howie Hawkins              | 2     |
| 5    | Other                      | 15    |
| 6    | Did not vote for President | 1303  |
| 8    | skipped                    | 2     |

## Political Interest

newsint

Categorical

Some people seem to follow what's going on in government and public affairs most of the time, whether there's an election going on or not. Others aren't that interested. Would you say you follow what's going on in government and public affairs ...

| Code | Label             | Count |
|------|-------------------|-------|
| 1    | Most of the time  | 1255  |
| 2    | Some of the time  | 959   |
| 3    | Only now and then | 517   |
| 4    | Hardly at all     | 382   |
| 7    | Don't know        | 167   |
| 98   | skipped           | 1     |

# TASS - Wave 1 - October 2023

## Ideology - 5 categories

ideo5

Categorical

In general, how would you describe your own political viewpoint?

| Code | Label             | Count |
|------|-------------------|-------|
| 1    | Very liberal      | 379   |
| 2    | Liberal           | 573   |
| 3    | Moderate          | 1177  |
| 4    | Conservative      | 480   |
| 5    | Very conservative | 294   |
| 6    | Not sure          | 377   |
| 8    | skipped           | 1     |

## Ideology - 3 categories

ideo3

Categorical

In general, how would you describe your own political viewpoint?

| Code | Label        | Count |
|------|--------------|-------|
| 1    | Liberal      | 952   |
| 2    | Moderate     | 1177  |
| 3    | Conservative | 774   |
| 4    | Not sure     | 377   |
| 9    | not asked    | 1     |

## Family Income

faminc

Categorical

Thinking back over the last year, what was your family's annual income?

*There are more than 20 categories. Please see Appendix 1*

# TASS - Wave 1 - October 2023

## Employment

Categorical

employ

Which of the following best describes your current employment status?

| Code | Label                | Count |
|------|----------------------|-------|
| 1    | Full-time            | 1062  |
| 2    | Part-time            | 460   |
| 3    | Temporarily laid off | 27    |
| 4    | Unemployed           | 343   |
| 5    | Retired              | 703   |
| 6    | Permanently disabled | 283   |
| 7    | Homemaker            | 166   |
| 8    | Student              | 161   |
| 9    | Other                | 76    |

## Employment Status - open

Text

employ\_t

(employ\_t)

| Filled | Missing | Max Length |
|--------|---------|------------|
| 72     | 3209    | 82         |

## Marital Status

Categorical

marstat

What is your marital status?

| Code | Label                        | Count |
|------|------------------------------|-------|
| 1    | Married                      | 1147  |
| 2    | Separated                    | 96    |
| 3    | Divorced                     | 393   |
| 4    | Widowed                      | 188   |
| 5    | Never married                | 1286  |
| 6    | Domestic / civil partnership | 171   |

# TASS - Wave 1 - October 2023

## Children Under 18

child18

Categorical

Are you the parent or guardian of any children under the age of 18?

| Code | Label | Count |
|------|-------|-------|
| 1    | Yes   | 689   |
| 2    | No    | 2592  |

## Area Type

urbancity

Categorical

How would you describe the place where you live?

| Code | Label      | Count |
|------|------------|-------|
| 1    | City       | 1232  |
| 2    | Suburb     | 1089  |
| 3    | Town       | 386   |
| 4    | Rural area | 550   |
| 5    | Other      | 23    |
| 8    | skipped    | 1     |

## Own or Rent Home

ownrent

Categorical

Do you own or rent the place you currently live?

| Code | Label     | Count |
|------|-----------|-------|
| 1    | Own       | 891   |
| 2    | Rent      | 733   |
| 3    | Other     | 136   |
| 8    | skipped   | 1     |
| 9    | not asked | 1520  |

# TASS - Wave 1 - October 2023

## Importance of Religion

Categorical

pew\_religimp

How important is religion in your life?

| Code | Label                | Count |
|------|----------------------|-------|
| 1    | Very important       | 1403  |
| 2    | Somewhat important   | 792   |
| 3    | Not too important    | 439   |
| 4    | Not at all important | 646   |
| 8    | skipped              | 1     |

## Church Attendance

Categorical

pew\_churatd

Aside from weddings and funerals, how often do you attend religious services?

| Code | Label                 | Count |
|------|-----------------------|-------|
| 1    | More than once a week | 337   |
| 2    | Once a week           | 572   |
| 3    | Once or twice a month | 235   |
| 4    | A few times a year    | 371   |
| 5    | Seldom                | 670   |
| 6    | Never                 | 961   |
| 7    | Don't know            | 133   |
| 98   | skipped               | 2     |

## Born Again

Categorical

pew\_bornagain

Would you describe yourself as a "born-again" or evangelical Christian, or not?

| Code | Label   | Count |
|------|---------|-------|
| 1    | Yes     | 1158  |
| 2    | No      | 2121  |
| 8    | skipped | 2     |

# TASS - Wave 1 - October 2023

## Prayer Frequency

pew\_prayer

Categorical

People practice their religion in different ways. Outside of attending religious services, how often do you pray?

| Code | Label               | Count |
|------|---------------------|-------|
| 1    | Several times a day | 1014  |
| 2    | Once a day          | 438   |
| 3    | A few times a week  | 392   |
| 4    | Once a week         | 117   |
| 5    | A few times a month | 203   |
| 6    | Seldom              | 426   |
| 7    | Never               | 535   |
| 8    | Don't know          | 153   |
| 98   | skipped             | 3     |

## Affiliation

religpew

Categorical

What is your present religion, if any?

| Code | Label                     | Count |
|------|---------------------------|-------|
| 1    | Protestant                | 1003  |
| 2    | Roman Catholic            | 635   |
| 3    | Mormon                    | 33    |
| 4    | Eastern or Greek Orthodox | 36    |
| 5    | Jewish                    | 54    |
| 6    | Muslim                    | 68    |
| 7    | Buddhist                  | 24    |
| 8    | Hindu                     | 13    |
| 9    | Atheist                   | 157   |
| 10   | Agnostic                  | 164   |
| 11   | Nothing in particular     | 768   |
| 12   | Something else            | 324   |
| 98   | skipped                   | 2     |

# TASS - Wave 1 - October 2023

## State of Residence

inputstate

Categorical

In what state do you live?

*There are more than 20 categories. Please see Appendix 2*

## Party ID - 3 categories

pid3

Categorical

Generally speaking, do you think of yourself as a ...?

| Code | Label       | Count |
|------|-------------|-------|
| 1    | Democrat    | 1397  |
| 2    | Republican  | 661   |
| 3    | Independent | 857   |
| 4    | Other       | 112   |
| 5    | Not sure    | 254   |

## Party ID - 7 categories

pid7

Categorical

Generally speaking, do you think of yourself as a ...?

| Code | Label                      | Count |
|------|----------------------------|-------|
| 1    | Strong Democrat            | 935   |
| 2    | Not very strong Democrat   | 462   |
| 3    | Lean Democrat              | 278   |
| 4    | Independent                | 614   |
| 5    | Lean Republican            | 178   |
| 6    | Not very strong Republican | 254   |
| 7    | Strong Republican          | 407   |
| 8    | Not sure                   | 153   |

# TASS - Wave 1 - October 2023

## Baseline 7 Point Party ID - November 1

pid7\_baseline

Categorical

Most Recent Party ID on or before November 1, 2022.

| Code | Label                      | Count |
|------|----------------------------|-------|
| 1    | Strong Democrat            | 928   |
| 2    | Not very strong Democrat   | 458   |
| 3    | Strong Republican          | 401   |
| 4    | Not very strong Republican | 256   |
| 5    | Lean Democrat              | 282   |
| 6    | Lean Republican            | 207   |
| 7    | Independent                | 577   |
| 8    | Not sure                   | 172   |

## Baseline 3 Point Party ID - November 1

pid3\_baseline

Categorical

Most Recent Party ID on or before November 1, 2022.

| Code | Label       | Count |
|------|-------------|-------|
| 1    | Democrat    | 1386  |
| 2    | Republican  | 657   |
| 3    | Independent | 840   |
| 4    | Other       | 125   |
| 5    | Not sure    | 273   |

## Actively Seek out News and Information

A1

Categorical

Choose the statement that best describes you, even if it is not exactly right. In general,...

| Code | Label                                                                                  | Count |
|------|----------------------------------------------------------------------------------------|-------|
| 1    | I actively seek out news and information                                               | 2075  |
| 2    | I bump into the news and information as I do other things or hear about it from others | 1198  |
| 8    | skipped                                                                                | 8     |



# TASS - Wave 1 - October 2023

## Trust the News - Report Fairly

A2

Categorical

How much of the time do you think you can trust the media to report the news fairly?

| Code | Label                 | Count |
|------|-----------------------|-------|
| 1    | Just about always     | 201   |
| 2    | Most of the time      | 1219  |
| 3    | Only some of the time | 1275  |
| 4    | Almost never          | 574   |
| 8    | skipped               | 12    |

## Trust the News - Report Accurately

A3

Categorical

How much of the time do you think you can trust the media to report the news accurately?

| Code | Label                 | Count |
|------|-----------------------|-------|
| 1    | Just about always     | 203   |
| 2    | Most of the time      | 1244  |
| 3    | Only some of the time | 1326  |
| 4    | Almost never          | 493   |
| 8    | skipped               | 15    |

## Trusted News Website

A4

Text

The internet has created a space for people to find and share information from many different sources. Some people trust information they read on some websites more than others. What about you? When you want to learn what is going on in the world, which website do you trust the most? Please enter the website URL.

| Filled | Missing | Max Length |
|--------|---------|------------|
| 2856   | 425     | 505        |

# TASS - Wave 1 - October 2023

## Most Important Problem

A5

Text

What do you think is the single most important problem facing the country?

| Filled | Missing | Max Length |
|--------|---------|------------|
| 3156   | 125     | 1817       |

## Most Likely - Newsom

B1

Categorical

Which of the two statements do you think is most likely to be true?

| Code | Label                                                                                                                                                                                                              | Count |
|------|--------------------------------------------------------------------------------------------------------------------------------------------------------------------------------------------------------------------|-------|
| 1    | California Governor Gavin Newsom recently vetoed a bill previously passed by the California Assembly that charges parents with child abuse for refusing to affirm their children's gender identity.                | 756   |
| 2    | California Governor Gavin Newsom recently vetoed a bill previously passed by the California Assembly that requires judges in custody disputes to consider whether parents affirm their children's gender identity. | 976   |
| 3    | Unsure                                                                                                                                                                                                             | 1535  |
| 8    | skipped                                                                                                                                                                                                            | 14    |

## Most Likely - Trump and Arizona

B2

Categorical

Which of the two statements do you think is most likely to be true?

| Code | Label                                                                                                                                                                                                                                             | Count |
|------|---------------------------------------------------------------------------------------------------------------------------------------------------------------------------------------------------------------------------------------------------|-------|
| 1    | It was eventually announced that Donald Trump lost Maricopa County, Arizona in the 2020 Presidential Election. This was despite the efforts of Republican election officials in that county attempting to falsely show that Donald Trump had won. | 1127  |
| 2    | It was eventually announced that Donald Trump lost Maricopa County, Arizona in the 2020 Presidential Election. This matched the conclusion of Republican officials in that county, who insisted from the beginning that Donald Trump had lost.    | 995   |
| 3    | Unsure                                                                                                                                                                                                                                            | 1151  |
| 8    | skipped                                                                                                                                                                                                                                           | 8     |

# TASS - Wave 1 - October 2023

## Most Likely - Judge Cannon

B3

Categorical

Which of the two statements do you think is most likely to be true?

| Code | Label                                                                                                                                                                           | Count |
|------|---------------------------------------------------------------------------------------------------------------------------------------------------------------------------------|-------|
| 1    | U.S. District Judge Aileen Cannon, who is overseeing one of Donald Trump's indictments and was appointed by Trump, has been forced by insiders to recuse herself from the case. | 632   |
| 2    | U.S. District Judge Aileen Cannon, who is overseeing one of Donald Trump's indictments and was appointed by Trump, is nonetheless allowed to continue overseeing the case.      | 1415  |
| 3    | Unsure                                                                                                                                                                          | 1217  |
| 8    | skipped                                                                                                                                                                         | 17    |

## Most Likely - Missouri State Senators

B4

Categorical

Which of the two statements do you think is most likely to be true?

| Code | Label                                                                                                                        | Count |
|------|------------------------------------------------------------------------------------------------------------------------------|-------|
| 1    | A recent video showed Republican Missouri state senators using flamethrowers to burn books.                                  | 904   |
| 2    | A recent video showed Republican Missouri state senators using flamethrowers to burn empty boxes before auctioning them off. | 572   |
| 3    | Unsure                                                                                                                       | 1794  |
| 8    | skipped                                                                                                                      | 11    |

## Most Likely - Trump and 2024

B5

Categorical

Which of the two statements do you think is most likely to be true?

| Code | Label                                                                                                                                                                                                              | Count |
|------|--------------------------------------------------------------------------------------------------------------------------------------------------------------------------------------------------------------------|-------|
| 1    | Congress has announced that they will not include Donald Trump on the 2024 ballot, even if he wins the GOP nomination. They will begin printing ballots, without Trump's name, in October 2023.                    | 383   |
| 2    | Although some organizations are working to block Donald Trump from appearing on the 2024 ballot, Congress has not announced that they will print ballots without his name. Congress does not administer elections. | 1946  |
| 3    | Unsure                                                                                                                                                                                                             | 942   |
| 8    | skipped                                                                                                                                                                                                            | 10    |

# TASS - Wave 1 - October 2023

## Area of Residence

C1

Grid

Thinking about the area within a mile of your place of residence, please indicate whether you agree or disagree with the following statements:

| Rows     |                                                     |
|----------|-----------------------------------------------------|
| Variable | Label                                               |
| C1_1     | This area is a reflection of me                     |
| C1_2     | I don't really fit in with the people who live here |
| C1_3     | I would move somewhere else if I could              |
| C1_4     | This is my favorite place to be                     |
| C1_5     | I really miss it when I am away too long            |
| C1_6     | I feel happiest when I am here                      |

| Columns |                   |
|---------|-------------------|
| Code    | Label             |
| 1       | Strongly agree    |
| 2       | Agree             |
| 3       | Somewhat agree    |
| 4       | Somewhat disagree |
| 5       | Disagree          |
| 6       | Strongly disagree |
| 8       | skipped           |

| Counts   |     |     |     |     |     |     |    |
|----------|-----|-----|-----|-----|-----|-----|----|
| Variable | 1   | 2   | 3   | 4   | 5   | 6   | 8  |
| C1_1     | 284 | 635 | 953 | 610 | 420 | 363 | 16 |
| C1_2     | 282 | 382 | 669 | 738 | 736 | 457 | 17 |
| C1_3     | 705 | 601 | 697 | 464 | 453 | 345 | 16 |
| C1_4     | 391 | 737 | 932 | 548 | 374 | 284 | 15 |
| C1_5     | 442 | 813 | 951 | 466 | 343 | 245 | 21 |
| C1_6     | 467 | 871 | 954 | 477 | 273 | 218 | 21 |

# TASS - Wave 1 - October 2023

## Rural Areas

C2

Grid

Please indicate how strongly you agree or disagree with the following statements:

| Rows     |                                                                                             |
|----------|---------------------------------------------------------------------------------------------|
| Variable | Label                                                                                       |
| C2_1     | Rural areas are boring and monotonous compared to life in other places                      |
| C2_2     | Big cities provide people with more opportunities to get ahead in life than other places do |
| C2_3     | Big cities are dirty and noisy places to live compared to other places                      |
| C2_4     | Rural areas are better places to raise children than other places                           |
| C2_5     | Big cities provide opportunities for new experiences that rural areas don't                 |
| C2_6     | People from big cities are unfriendly and aggressive compared to other areas                |
| C2_7     | Rural people are crude and uncultured compared with people living elsewhere                 |
| C2_8     | People living in big cities have stressful lives compared to those living elsewhere         |
| C2_9     | People from small towns are suspicious and closed minded compared to people elsewhere       |

| Columns |                   |
|---------|-------------------|
| Code    | Label             |
| 1       | Strongly agree    |
| 2       | Agree             |
| 3       | Somewhat agree    |
| 4       | Somewhat disagree |
| 5       | Disagree          |
| 6       | Strongly disagree |
| 8       | skipped           |

## TASS - Wave 1 - October 2023

| Variable | Counts |      |      |     |     |     |    |
|----------|--------|------|------|-----|-----|-----|----|
|          | 1      | 2    | 3    | 4   | 5   | 6   | 8  |
| C2_1     | 228    | 386  | 768  | 767 | 621 | 434 | 77 |
| C2_2     | 512    | 891  | 1075 | 410 | 205 | 115 | 73 |
| C2_3     | 513    | 703  | 1026 | 505 | 304 | 149 | 81 |
| C2_4     | 520    | 635  | 1030 | 624 | 265 | 150 | 57 |
| C2_5     | 638    | 1050 | 1017 | 298 | 106 | 105 | 67 |
| C2_6     | 296    | 503  | 966  | 716 | 469 | 253 | 78 |
| C2_7     | 132    | 245  | 524  | 732 | 807 | 762 | 79 |
| C2_8     | 445    | 750  | 1065 | 540 | 278 | 131 | 72 |
| C2_9     | 213    | 380  | 860  | 726 | 603 | 429 | 70 |

### Qualities of Residence

C3

Grid

How would you rate each of the following in the place where you live now?

| Rows     |                                                 |
|----------|-------------------------------------------------|
| Variable | Label                                           |
| C3_1     | Job opportunities                               |
| C3_2     | Cost of housing and living expenses             |
| C3_3     | As a place to raise children                    |
| C3_4     | Low crime and safety                            |
| C3_5     | Quality of public schools                       |
| C3_6     | As a place where people look out for each other |

| Columns |           |
|---------|-----------|
| Code    | Label     |
| 1       | Excellent |
| 2       | Good      |
| 3       | Only Fair |
| 4       | Poor      |
| 8       | skipped   |

## TASS - Wave 1 - October 2023

| Variable | Counts |      |      |     |    |
|----------|--------|------|------|-----|----|
|          | 1      | 2    | 3    | 4   | 8  |
| C3_1     | 435    | 1396 | 1008 | 428 | 14 |
| C3_2     | 299    | 983  | 1120 | 858 | 21 |
| C3_3     | 654    | 1483 | 789  | 339 | 16 |
| C3_4     | 506    | 1342 | 844  | 569 | 20 |
| C3_5     | 510    | 1463 | 895  | 398 | 15 |
| C3_6     | 473    | 1348 | 1011 | 428 | 21 |

### Race and Racism

D1

Grid

Do you agree or disagree with the following statements?

| Rows     |                                                                                     |
|----------|-------------------------------------------------------------------------------------|
| Variable | Label                                                                               |
| D1_1     | I am angry that racism exists                                                       |
| D1_2     | White people in the U.S. have certain advantages because of the color of their skin |
| D1_3     | I often find myself fearful of people of other races                                |
| D1_4     | Racial problems in the U.S. are rare, isolated situations                           |

| Columns |                   |
|---------|-------------------|
| Code    | Label             |
| 1       | Strongly agree    |
| 2       | Agree             |
| 3       | Somewhat agree    |
| 4       | Somewhat disagree |
| 5       | Disagree          |
| 6       | Strongly disagree |
| 8       | skipped           |

## TASS - Wave 1 - October 2023

| Variable | Counts |     |     |     |     |      |    |
|----------|--------|-----|-----|-----|-----|------|----|
|          | 1      | 2   | 3   | 4   | 5   | 6    | 8  |
| D1_1     | 1466   | 890 | 539 | 178 | 100 | 91   | 17 |
| D1_2     | 990    | 757 | 612 | 312 | 267 | 325  | 18 |
| D1_3     | 148    | 247 | 491 | 600 | 892 | 891  | 12 |
| D1_4     | 253    | 316 | 499 | 569 | 622 | 1012 | 10 |

### Democrat or Republican for Scale Ques...

scale\_piping

Categorical

Democrat or Republican for Scale Questions - Version 1

| Code | Label       | Count |
|------|-------------|-------|
| 1    | Democrats   | 2066  |
| 2    | Republicans | 1215  |

### Democrat or Republican for Scale Ques...

alt\_scale\_piping

Categorical

Democrat or Republican for Scale Questions - Version 2

| Code | Label       | Count |
|------|-------------|-------|
| 1    | Democrats   | 1215  |
| 2    | Republicans | 2066  |

### Democrat or Republican for Scale Ques...

scale\_piping\_2

Categorical

Democrat or Republican for Scale Questions - Version 3

| Code | Label      | Count |
|------|------------|-------|
| 1    | Democratic | 2066  |
| 2    | Republican | 1215  |



# TASS - Wave 1 - October 2023

## Democrat or Republican for Scale Ques...

alt\_scale\_piping\_2

Categorical

Democrat or Republican for Scale Questions - Version 4

| Code | Label      | Count |
|------|------------|-------|
| 1    | Democratic | 1215  |
| 2    | Republican | 2066  |

## Scale - Polling Stations

E1

Numeric

[Democrats/Republicans] should reduce the number of polling stations in areas that support [Republicans/Democrats] (left text: Strongly disagree, right text: Strongly agree)

| Mean  | SD | Min | Max | n    | Missing |
|-------|----|-----|-----|------|---------|
| 25.98 | 30 | 0   | 100 | 2368 | 913     |

## Scale - Governors and Court Rulings

E2

Numeric

[Democratic/Republican] governors should ignore unfavorable court rulings by [Republican/Democratic]-appointed judges (left text: Strongly disagree, right text: Strongly agree)

| Mean  | SD | Min | Max | n    | Missing |
|-------|----|-----|-----|------|---------|
| 32.08 | 31 | 0   | 100 | 2394 | 887     |

## Scale - Governors and Journalists

E3

Numeric

[Democratic/Republican] governors should prosecute journalists who accuse [Republican/Democratic] politicians of misconduct without revealing sources (left text: Strongly disagree, right text: Strongly agree)

| Mean | SD | Min | Max | n    | Missing |
|------|----|-----|-----|------|---------|
| 36.5 | 33 | 0   | 100 | 2284 | 997     |

# TASS - Wave 1 - October 2023

## Scale - Accept Election Results

E4

Numeric

[Democrats/Republicans] should not accept the results of elections if they lose (left text: Strongly disagree, right text: Strongly agree)

| Mean  | SD | Min | Max | n    | Missing |
|-------|----|-----|-----|------|---------|
| 28.28 | 33 | 0   | 100 | 2456 | 825     |

## Scale - Polling Stations - Don't Know

E1\_dk\_flag

Numeric

Don't know

| Mean | SD | Min | Max | n    | Missing |
|------|----|-----|-----|------|---------|
| 0.18 | 0  | 0   | 1   | 3281 | 0       |

## Scale - Governors and Court Rulings -...

E2\_dk\_flag

Numeric

Scale - Governors and Court Rulings - Don't KnowDon't know

| Mean | SD | Min | Max | n    | Missing |
|------|----|-----|-----|------|---------|
| 0.21 | 0  | 0   | 1   | 3281 | 0       |

## Scale - Governors and Journalists - D...

E3\_dk\_flag

Numeric

Scale - Governors and Journalists - Don't KnowDon't know

| Mean | SD | Min | Max | n    | Missing |
|------|----|-----|-----|------|---------|
| 0.24 | 0  | 0   | 1   | 3281 | 0       |

# TASS - Wave 1 - October 2023

## Scale - Accept Election Results - Don...

E4\_dk\_flag

Numeric

Scale - Accept Election Results - Don't KnowDon't know

| Mean | SD | Min | Max | n    | Missing |
|------|----|-----|-----|------|---------|
| 0.16 | 0  | 0   | 1   | 3281 | 0       |

## Rating Politicians – Chris Christie

F1t\_1

Numeric

(F1t\_1)

| Mean | SD | Min | Max | n    | Missing |
|------|----|-----|-----|------|---------|
| 37.7 | 25 | 0   | 100 | 2989 | 292     |

## Rating Politicians – Ron DeSantis

F1t\_2

Numeric

(F1t\_2)

| Mean  | SD | Min | Max | n    | Missing |
|-------|----|-----|-----|------|---------|
| 37.42 | 32 | 0   | 100 | 2911 | 370     |

## Rating Politicians – Nikki Haley

F1t\_3

Numeric

(F1t\_3)

| Mean  | SD | Min | Max | n    | Missing |
|-------|----|-----|-----|------|---------|
| 41.14 | 26 | 0   | 100 | 2966 | 315     |

# TASS - Wave 1 - October 2023

## Rating Politicians – Mike Pence

Numeric

(F1t\_4)

F1t\_4

| Mean  | SD | Min | Max | n    | Missing |
|-------|----|-----|-----|------|---------|
| 36.18 | 28 | 0   | 100 | 2961 | 320     |

## Rating Politicians – Vivek Ramaswamy

Numeric

(F1t\_5)

F1t\_5

| Mean  | SD | Min | Max | n    | Missing |
|-------|----|-----|-----|------|---------|
| 39.22 | 27 | 0   | 100 | 2942 | 339     |

## Rating Politicians – Tim Scott

Numeric

(F1t\_6)

F1t\_6

| Mean  | SD | Min | Max | n    | Missing |
|-------|----|-----|-----|------|---------|
| 41.06 | 26 | 0   | 100 | 2970 | 311     |

## Rating Politicians – Donald Trump

Numeric

(F1t\_7)

F1t\_7

| Mean  | SD | Min | Max | n    | Missing |
|-------|----|-----|-----|------|---------|
| 39.12 | 37 | 0   | 100 | 2876 | 405     |

# TASS - Wave 1 - October 2023

## Rating Politicians – Joe Biden

Numeric

F1t\_8

(F1t\_8)

| Mean  | SD | Min | Max | n    | Missing |
|-------|----|-----|-----|------|---------|
| 50.39 | 34 | 0   | 100 | 2986 | 295     |

## Voted in Presidential Primary Election

Multiple Response

F2

Have you voted in a recent presidential primary election or presidential caucus? Select all that apply.

| Rows     |                  |
|----------|------------------|
| Variable | Label            |
| F2_1     | Yes, in 2020     |
| F2_2     | Yes, in 2016     |
| F2_3     | Yes, before 2016 |
| F2_4     | No, not lately   |
| F2_5     | No, not eligible |
| F2_6     | Don't recall     |

| Columns |              |
|---------|--------------|
| Code    | Label        |
| 1       | selected     |
| 2       | not selected |

| Variable | Counts |      |
|----------|--------|------|
|          | 1      | 2    |
| F2_1     | 1960   | 1321 |
| F2_2     | 1542   | 1739 |
| F2_3     | 1357   | 1924 |
| F2_4     | 522    | 2759 |
| F2_5     | 296    | 2985 |
| F2_6     | 296    | 2985 |

# TASS - Wave 1 - October 2023

## Republican Candidate with Best Chance

F3

Categorical

Regardless of whom you support, which Republican candidate do you think has the best chance of winning the party's nomination?

| Code | Label           | Count |
|------|-----------------|-------|
| 1    | Chris Christie  | 187   |
| 2    | Ron DeSantis    | 321   |
| 3    | Nikki Haley     | 245   |
| 4    | Mike Pence      | 300   |
| 5    | Vivek Ramaswamy | 90    |
| 6    | Tim Scott       | 120   |
| 7    | Donald Trump    | 1659  |
| 8    | Somebody else   | 297   |
| 98   | skipped         | 62    |

## Republican Candidate with Best Chance...

F3\_t

Text

Republican Candidate with Best Chance - Other

| Filled | Missing | Max Length |
|--------|---------|------------|
| 236    | 3045    | 66         |

# TASS - Wave 1 - October 2023

## Primary Election Vote

F4

Categorical

If the presidential primary election or caucus in your state was being held today, for whom would you vote?

| Code | Label           | Count |
|------|-----------------|-------|
| 1    | Chris Christie  | 126   |
| 2    | Ron DeSantis    | 209   |
| 3    | Nikki Haley     | 185   |
| 4    | Mike Pence      | 144   |
| 5    | Vivek Ramaswamy | 79    |
| 6    | Tim Scott       | 75    |
| 7    | Donald Trump    | 811   |
| 8    | Joe Biden       | 1206  |
| 9    | Somebody else   | 390   |
| 98   | skipped         | 56    |

## Primary Election Vote - Other

F4\_t

Text

(F4\_t)

| Filled | Missing | Max Length |
|--------|---------|------------|
| 339    | 2942    | 145        |

# TASS - Wave 1 - October 2023

## Candidate with Best Chance

F5

Categorical

Regardless of whom you support, which Democratic or Republican candidate do you think has the best chance of winning the general election in November of 2024 if nominated by his or her party?

| Code | Label           | Count |
|------|-----------------|-------|
| 1    | Chris Christie  | 74    |
| 2    | Ron DeSantis    | 180   |
| 3    | Nikki Haley     | 126   |
| 4    | Mike Pence      | 149   |
| 5    | Vivek Ramaswamy | 60    |
| 6    | Tim Scott       | 67    |
| 7    | Donald Trump    | 979   |
| 8    | Joe Biden       | 1368  |
| 9    | Somebody else   | 224   |
| 98   | skipped         | 54    |

## Candidate with Best Chance - Other

F5\_t

Text

(F5\_t)

| Filled | Missing | Max Length |
|--------|---------|------------|
| 192    | 3089    | 70         |

## Randomization for Battery A or B

battery\_ab\_randomization

Categorical

Randomization for Battery A or B

| Code | Label         | Count |
|------|---------------|-------|
| 1    | Battery A     | 1080  |
| 2    | Battery A (1) | 1106  |
| 3    | Battery B     | 1095  |



# TASS - Wave 1 - October 2023

## Battery A - Woman and Power

G1

Categorical

Please tell us whether you agree or disagree with the following statement: Women seek to gain power by getting control over men.

*Shown to a random 2/3 of respondents*

| Code | Label             | Count |
|------|-------------------|-------|
| 1    | Strongly disagree | 438   |
| 2    | Disagree          | 508   |
| 3    | Somewhat disagree | 434   |
| 4    | Somewhat agree    | 463   |
| 5    | Agree             | 206   |
| 6    | Strongly agree    | 132   |
| 8    | skipped           | 5     |
| 9    | not asked         | 1095  |

## Battery A - Woman Should be Cherished

G2

Categorical

Please tell us whether you agree or disagree with the following statement: Women should be cherished and protected by men.

*Shown to a random 2/3 of respondents*

| Code | Label             | Count |
|------|-------------------|-------|
| 1    | Strongly disagree | 82    |
| 2    | Disagree          | 103   |
| 3    | Somewhat disagree | 199   |
| 4    | Somewhat agree    | 582   |
| 5    | Agree             | 563   |
| 6    | Strongly agree    | 649   |
| 8    | skipped           | 8     |
| 9    | not asked         | 1095  |

# TASS - Wave 1 - October 2023

## Battery A - Woman Exaggerate

G3

Categorical

How often do women exaggerate problems they have at work?

*Shown to a random 2/3 of respondents*

| Code | Label     | Count |
|------|-----------|-------|
| 1    | Always    | 120   |
| 2    | Often     | 350   |
| 3    | Sometimes | 1013  |
| 4    | Rarely    | 568   |
| 5    | Never     | 126   |
| 8    | skipped   | 9     |
| 9    | not asked | 1095  |

## Battery B - Describe Men

G4

Grid

Now, we'd like to ask you how well some phrases describe different kinds of people in society. How well does each of these describe most men?

*Shown to a random 1/3 of respondents*

| Rows     |                          |
|----------|--------------------------|
| Variable | Label                    |
| G4_1     | A strong leader          |
| G4_2     | Smart                    |
| G4_3     | Honest                   |
| G4_4     | Cares about other people |
| G4_5     | Likable                  |
| G4_6     | Mean                     |

## TASS - Wave 1 - October 2023

| Columns |            |
|---------|------------|
| Code    | Label      |
| 1       | Extremely  |
| 2       | Very       |
| 3       | Moderately |
| 4       | Slightly   |
| 5       | Not at all |
| 8       | skipped    |
| 9       | not asked  |

| Variable | Counts |     |     |     |     |    |      |
|----------|--------|-----|-----|-----|-----|----|------|
|          | 1      | 2   | 3   | 4   | 5   | 8  | 9    |
| G4_1     | 159    | 307 | 447 | 112 | 60  | 10 | 2186 |
| G4_2     | 116    | 302 | 515 | 102 | 48  | 12 | 2186 |
| G4_3     | 87     | 188 | 528 | 197 | 81  | 14 | 2186 |
| G4_4     | 98     | 198 | 525 | 193 | 65  | 16 | 2186 |
| G4_5     | 96     | 265 | 560 | 113 | 50  | 11 | 2186 |
| G4_6     | 77     | 185 | 430 | 271 | 118 | 14 | 2186 |

### Battery B - Describe Women

G5

Grid

Now, we'd like to ask you how well some phrases describe different kinds of people in society. How well does each of these describe most women ?

*Shown to a random 1/3 of respondents*

| Rows     |                          |
|----------|--------------------------|
| Variable | Label                    |
| G5_1     | A strong leader          |
| G5_2     | Smart                    |
| G5_3     | Honest                   |
| G5_4     | Cares about other people |
| G5_5     | Likable                  |
| G5_6     | Mean                     |

## TASS - Wave 1 - October 2023

| Columns |            |
|---------|------------|
| Code    | Label      |
| 1       | Extremely  |
| 2       | Very       |
| 3       | Moderately |
| 4       | Slightly   |
| 5       | Not at all |
| 8       | skipped    |
| 9       | not asked  |

| Variable | Counts |     |     |     |     |    |      |
|----------|--------|-----|-----|-----|-----|----|------|
|          | 1      | 2   | 3   | 4   | 5   | 8  | 9    |
| G5_1     | 173    | 322 | 430 | 109 | 48  | 13 | 2186 |
| G5_2     | 217    | 419 | 372 | 50  | 28  | 9  | 2186 |
| G5_3     | 158    | 344 | 447 | 98  | 40  | 8  | 2186 |
| G5_4     | 219    | 438 | 342 | 52  | 34  | 10 | 2186 |
| G5_5     | 172    | 383 | 425 | 70  | 35  | 10 | 2186 |
| G5_6     | 70     | 145 | 397 | 296 | 179 | 8  | 2186 |

### Battery B - Describe the President

G6

Grid

Now, please consider the best possible President of the United States. How well does each of these describe the best possible President?

*Shown to a random 1/3 of respondents*

| Rows     |                          |
|----------|--------------------------|
| Variable | Label                    |
| G6_1     | A strong leader          |
| G6_2     | Smart                    |
| G6_3     | Honest                   |
| G6_4     | Cares about other people |
| G6_5     | Likable                  |
| G6_6     | Mean                     |

## TASS - Wave 1 - October 2023

| Columns |            |
|---------|------------|
| Code    | Label      |
| 1       | Extremely  |
| 2       | Very       |
| 3       | Moderately |
| 4       | Slightly   |
| 5       | Not at all |
| 8       | skipped    |
| 9       | not asked  |

| Variable | Counts |     |     |     |     |    |      |
|----------|--------|-----|-----|-----|-----|----|------|
|          | 1      | 2   | 3   | 4   | 5   | 8  | 9    |
| G6_1     | 603    | 253 | 152 | 36  | 37  | 14 | 2186 |
| G6_2     | 482    | 364 | 169 | 32  | 35  | 13 | 2186 |
| G6_3     | 511    | 291 | 174 | 57  | 49  | 13 | 2186 |
| G6_4     | 494    | 330 | 179 | 39  | 41  | 12 | 2186 |
| G6_5     | 286    | 379 | 314 | 61  | 43  | 12 | 2186 |
| G6_6     | 54     | 97  | 273 | 272 | 386 | 13 | 2186 |

### Importance of Women in Political Office

G7

Categorical

How important is it that more women be elected to political office?

| Code | Label                | Count |
|------|----------------------|-------|
| 1    | Not at all important | 374   |
| 2    | Slightly important   | 455   |
| 3    | Moderately important | 979   |
| 4    | Very important       | 806   |
| 5    | Extremely important  | 660   |
| 8    | skipped              | 7     |

# TASS - Wave 1 - October 2023

## Support Corporations Reducing Gender ...

G8

Categorical

Support Corporations Reducing Gender Gaps Do you support or oppose the following policy? Require corporations to show that they're not engaging in gender-based pay discrimination and fine companies that fail to close their gender-based pay gaps.

| Code | Label                      | Count |
|------|----------------------------|-------|
| 1    | Strongly oppose            | 238   |
| 2    | Oppose                     | 233   |
| 3    | Neither support nor oppose | 1075  |
| 4    | Support                    | 918   |
| 5    | Strongly support           | 806   |
| 8    | skipped                    | 11    |

## Randomization for Vignettes

vignette\_randomization

Categorical

Randomization for vignettes

| Code | Label      | Count |
|------|------------|-------|
| 1    | Vignette 1 | 1088  |
| 2    | Vignette 2 | 1109  |
| 3    | Vignette 3 | 1084  |

# TASS - Wave 1 - October 2023

## U.S. Should Ban Social Media Platforms

H1

Categorical

How likely are you to support a politician that advocates banning certain social media platforms in the interest of national security?

| Code | Label                       | Count |
|------|-----------------------------|-------|
| 1    | Very unlikely               | 318   |
| 2    | Unlikely                    | 237   |
| 3    | Somewhat unlikely           | 273   |
| 4    | Neither unlikely nor likely | 1084  |
| 5    | Somewhat likely             | 560   |
| 6    | Likely                      | 408   |
| 7    | Very likely                 | 398   |
| 98   | skipped                     | 3     |

## U.S. Should Inspect Social Media Content

H2

Categorical

To what extent do you agree or disagree with the following statement? U.S. authorities should more frequently inspect content on social media platforms in the interest of national security.

| Code | Label                      | Count |
|------|----------------------------|-------|
| 1    | Strongly disagree          | 187   |
| 2    | Disagree                   | 176   |
| 3    | Somewhat disagree          | 226   |
| 4    | Neither agree nor disagree | 881   |
| 5    | Somewhat agree             | 759   |
| 6    | Agree                      | 559   |
| 7    | Strongly agree             | 480   |
| 98   | skipped                    | 13    |

# TASS - Wave 1 - October 2023

## U.S. Should Prosecute Foreign Software

H3

Categorical

To what extent do you agree or disagree with the following statement? The federal government should prosecute American citizens who use banned foreign software.

| Code | Label                      | Count |
|------|----------------------------|-------|
| 1    | Strongly disagree          | 236   |
| 2    | Disagree                   | 267   |
| 3    | Somewhat disagree          | 262   |
| 4    | Neither agree nor disagree | 1073  |
| 5    | Somewhat agree             | 644   |
| 6    | Agree                      | 469   |
| 7    | Strongly agree             | 312   |
| 98   | skipped                    | 18    |

## Americans with Foreign Government Tie...

H4

Categorical

Americans with Foreign Government Ties Should not be Eligible for OfficeTo what extent do you support or oppose this statement? American citizens with family or business ties with foreign governments should become ineligible for political office.

| Code | Label                      | Count |
|------|----------------------------|-------|
| 1    | Strongly oppose            | 204   |
| 2    | Oppose                     | 249   |
| 3    | Somewhat oppose            | 289   |
| 4    | Neither oppose nor support | 1112  |
| 5    | Somewhat support           | 559   |
| 6    | Support                    | 416   |
| 7    | Strongly support           | 441   |
| 98   | skipped                    | 11    |



# TASS - Wave 1 - October 2023

## President and the Supreme Court on Na...

H5

Categorical

President and the Supreme Court on National SecurityTo what extent do you support or oppose this statement?  
On matters relevant to national security, the President may ignore Supreme Court decisions.

| Code | Label                      | Count |
|------|----------------------------|-------|
| 1    | Strongly oppose            | 676   |
| 2    | Oppose                     | 453   |
| 3    | Somewhat oppose            | 385   |
| 4    | Neither oppose nor support | 1084  |
| 5    | Somewhat support           | 341   |
| 6    | Support                    | 213   |
| 7    | Strongly support           | 118   |
| 98   | skipped                    | 11    |

## U.S. Should Limit Immigration from Un...

H6

Categorical

U.S. Should Limit Immigration from Unfriendly NationsTo what extent do you support or oppose this statement?  
The federal government should more strictly limit immigration from unfriendly nations, such as China.

| Code | Label                      | Count |
|------|----------------------------|-------|
| 1    | Strongly oppose            | 124   |
| 2    | Oppose                     | 200   |
| 3    | Somewhat oppose            | 285   |
| 4    | Neither oppose nor support | 970   |
| 5    | Somewhat support           | 556   |
| 6    | Support                    | 444   |
| 7    | Strongly support           | 685   |
| 98   | skipped                    | 17    |

# TASS - Wave 1 - October 2023

## The Sample of the Respondent

sample

Categorical

Which sample is the respondent from?

| Code | Label              | Count |
|------|--------------------|-------|
| 1    | General population | 2174  |
| 2    | Black oversample   | 1107  |

## Questionnaire Start Time

starttime

Date

When did you start this qx (epoch seconds)?

| Filled | Missing | Range                                                                 |
|--------|---------|-----------------------------------------------------------------------|
| 3281   | 0       | [2023-10-16 18:30:18.6270000934601, 2023-10-24 22:33:24.819000005722] |

## Questionnaire End Time

endtime

Date

When did you complete this qx (epoch seconds)?

| Filled | Missing | Range                                           |
|--------|---------|-------------------------------------------------|
| 3281   | 0       | [1970-01-01, 2023-10-24 22:45:24.8959999084473] |

## Questionnaire Last Modified Time

lastmodified

Date

What was the last time you visited this questionnaire?

| Filled | Missing | Range                                                                  |
|--------|---------|------------------------------------------------------------------------|
| 3281   | 0       | [2023-10-16 18:47:42.3959999084473, 2023-10-24 22:45:24.7400000095367] |

# TASS - Wave 1 - October 2023

## Pulse Member

Categorical

pulse\_member

Is the respondent a Pulse member?

| Code | Label | Count |
|------|-------|-------|
| 0    | False | 2778  |
| 1    | True  | 503   |

## Weight

Numeric

weight

(weight)

| Mean | SD | Min  | Max  | n    | Missing |
|------|----|------|------|------|---------|
| 1    | 1  | 0.05 | 6.01 | 3281 | 0       |

## Unique ID

Text

ID

Unique ID variable to match to Pulse Data and future waves

| Filled | Missing | Max Length |
|--------|---------|------------|
| 3281   | 0       | 26         |

## Voter Status

Categorical

voterstatus

(voterstatus)

| Code | Label   | Count |
|------|---------|-------|
| -1   | No Data | 1518  |
| 1    | Active  | 1763  |

# TASS - Wave 1 - October 2023

## Vote Method - 2020 General

g2020

Categorical

(g2020)

| Code | Label           | Count |
|------|-----------------|-------|
| −1   | No Data         | 1518  |
| 1    | absentee        | 487   |
| 2    | absentee, vr    | 25    |
| 3    | early           | 234   |
| 4    | early, vr       | 11    |
| 5    | mail            | 138   |
| 6    | no vote history | 340   |
| 7    | poll            | 126   |
| 8    | poll, vr        | 7     |
| 9    | provisional     | 6     |
| 10   | voted           | 367   |
| 11   | voted, vr       | 22    |

## Vote Method - 2022 General

g2022

Categorical

(g2022)

| Code | Label           | Count |
|------|-----------------|-------|
| −1   | No Data         | 1518  |
| 1    | absentee        | 350   |
| 2    | absentee, vr    | 6     |
| 3    | early           | 215   |
| 4    | early, vr       | 1     |
| 5    | mail            | 88    |
| 6    | no vote history | 521   |
| 7    | poll            | 259   |
| 8    | poll, vr        | 4     |
| 9    | provisional     | 2     |
| 10   | voted           | 311   |
| 11   | voted, vr       | 6     |

# TASS - Wave 1 - October 2023

## Vote Method - 2020 Primary

p2020

Categorical

(p2020)

| Code | Label           | Count |
|------|-----------------|-------|
| -1   | No Data         | 1518  |
| 1    | absentee        | 284   |
| 2    | absentee, vr    | 19    |
| 3    | early           | 101   |
| 4    | early, vr       | 4     |
| 5    | mail            | 84    |
| 6    | no vote history | 906   |
| 7    | poll            | 106   |
| 8    | poll, vr        | 5     |
| 9    | provisional     | 2     |
| 10   | provisional, vr | 1     |
| 11   | voted           | 233   |
| 12   | voted, vr       | 18    |

## Vote Method - 2022 Primary

p2022

Categorical

(p2022)

| Code | Label           | Count |
|------|-----------------|-------|
| -1   | No Data         | 1518  |
| 1    | absentee        | 224   |
| 2    | absentee, vr    | 8     |
| 3    | early           | 116   |
| 4    | early, vr       | 2     |
| 5    | mail            | 68    |
| 6    | no vote history | 1003  |
| 7    | poll            | 163   |
| 8    | poll, vr        | 1     |
| 9    | provisional     | 1     |
| 10   | voted           | 169   |
| 11   | voted, vr       | 8     |

# TASS - Wave 1 - October 2023

## Party - 2020 Primary

Categorical

p2020\_party

(p2020\_party)

| Code | Label   | Count |
|------|---------|-------|
| –1   | No Data | 2817  |
| 1    | dem     | 326   |
| 2    | green   | 3     |
| 3    | ind     | 2     |
| 4    | other   | 3     |
| 5    | rep     | 130   |

## Party - 2022 Primary

Categorical

p2022\_party

(p2022\_party)

| Code | Label   | Count |
|------|---------|-------|
| –1   | No Data | 2962  |
| 1    | dem     | 221   |
| 2    | rep     | 98    |

## Voter Registration State

Categorical

vb.vf\_reg\_state

(vb.vf\_reg\_state)

*There are more than 20 categories. Please see Appendix 3*

# TASS - Wave 1 - October 2023

## Party Registration

Categorical

(partyreg)

partyreg

| Code | Label             | Count |
|------|-------------------|-------|
| -1   | No Data           | 2500  |
| 1    | dem               | 515   |
| 2    | green             | 7     |
| 3    | ind               | 20    |
| 4    | libertarian       | 3     |
| 5    | other             | 11    |
| 6    | peace and freedom | 1     |
| 7    | rep               | 224   |

## Match Status

Categorical

(matchstatus)

matchstatus

| Code | Label       | Count |
|------|-------------|-------|
| 1    | Matched     | 1763  |
| 2    | Not matched | 1518  |

# Appendix

## Family Income

faminc

Categorical

Thinking back over the last year, what was your family's annual income?

| Code | Label                 | Count |
|------|-----------------------|-------|
| 1    | Less than \$10,000    | 364   |
| 2    | \$10,000 - \$19,999   | 329   |
| 3    | \$20,000 - \$29,999   | 392   |
| 4    | \$30,000 - \$39,999   | 322   |
| 5    | \$40,000 - \$49,999   | 237   |
| 6    | \$50,000 - \$59,999   | 246   |
| 7    | \$60,000 - \$69,999   | 192   |
| 8    | \$70,000 - \$79,999   | 215   |
| 9    | \$80,000 - \$99,999   | 178   |
| 10   | \$100,000 - \$119,999 | 158   |
| 11   | \$120,000 - \$149,999 | 120   |
| 12   | \$150,000 - \$199,999 | 96    |
| 13   | \$200,000 - \$249,999 | 45    |
| 14   | \$250,000 - \$349,999 | 24    |
| 15   | \$350,000 - \$499,999 | 12    |
| 16   | \$500,000 or more     | 20    |
| 97   | Prefer not to say     | 330   |
| 998  | skipped               | 1     |



# Appendix

## State of Residence

Categorical

inputstate

In what state do you live?

| Code | Label                | Count | Code | Label          | Count |
|------|----------------------|-------|------|----------------|-------|
| 1    | Alabama              | 62    | 2    | Alaska         | 4     |
| 4    | Arizona              | 85    | 5    | Arkansas       | 33    |
| 6    | California           | 300   | 8    | Colorado       | 36    |
| 9    | Connecticut          | 24    | 10   | Delaware       | 17    |
| 11   | District of Columbia | 12    | 12   | Florida        | 261   |
| 13   | Georgia              | 160   | 15   | Hawaii         | 10    |
| 16   | Idaho                | 12    | 17   | Illinois       | 130   |
| 18   | Indiana              | 47    | 19   | Iowa           | 26    |
| 20   | Kansas               | 20    | 21   | Kentucky       | 50    |
| 22   | Louisiana            | 49    | 23   | Maine          | 13    |
| 24   | Maryland             | 57    | 25   | Massachusetts  | 40    |
| 26   | Michigan             | 90    | 27   | Minnesota      | 41    |
| 28   | Mississippi          | 42    | 29   | Missouri       | 53    |
| 30   | Montana              | 9     | 31   | Nebraska       | 10    |
| 32   | Nevada               | 31    | 33   | New Hampshire  | 12    |
| 34   | New Jersey           | 81    | 35   | New Mexico     | 20    |
| 36   | New York             | 261   | 37   | North Carolina | 106   |
| 38   | North Dakota         | 2     | 39   | Ohio           | 139   |
| 40   | Oklahoma             | 28    | 41   | Oregon         | 47    |
| 42   | Pennsylvania         | 139   | 44   | Rhode Island   | 13    |
| 45   | South Carolina       | 56    | 46   | South Dakota   | 3     |
| 47   | Tennessee            | 65    | 48   | Texas          | 324   |
| 49   | Utah                 | 15    | 50   | Vermont        | 9     |
| 51   | Virginia             | 102   | 53   | Washington     | 54    |
| 54   | West Virginia        | 20    | 55   | Wisconsin      | 60    |
| 56   | Wyoming              | 1     |      |                |       |

# Appendix

## Voter Registration State

Categorical

(vb.vf\_reg\_state)

vb.vf\_reg\_state

| Code | Label   | Count | Code | Label | Count |
|------|---------|-------|------|-------|-------|
| −1   | No Data | 1518  | 1    | AK    | 3     |
| 2    | AL      | 33    | 3    | AR    | 10    |
| 4    | AZ      | 54    | 5    | CA    | 155   |
| 6    | CO      | 18    | 7    | CT    | 17    |
| 8    | DC      | 7     | 9    | DE    | 10    |
| 10   | FL      | 120   | 11   | GA    | 89    |
| 12   | HI      | 5     | 13   | IA    | 14    |
| 14   | ID      | 7     | 15   | IL    | 75    |
| 16   | IN      | 25    | 17   | KS    | 9     |
| 18   | KY      | 34    | 19   | LA    | 22    |
| 20   | MA      | 19    | 21   | MD    | 38    |
| 22   | ME      | 10    | 23   | MI    | 62    |
| 24   | MN      | 24    | 25   | MO    | 38    |
| 26   | MS      | 18    | 27   | MT    | 4     |
| 28   | NC      | 58    | 29   | ND    | 3     |
| 30   | NE      | 5     | 31   | NH    | 9     |
| 32   | NJ      | 50    | 33   | NM    | 14    |
| 34   | NV      | 19    | 35   | NY    | 106   |
| 36   | OH      | 76    | 37   | OK    | 10    |
| 38   | OR      | 32    | 39   | PA    | 93    |
| 40   | RI      | 9     | 41   | SC    | 31    |
| 42   | SD      | 2     | 43   | TN    | 35    |
| 44   | TX      | 155   | 45   | UT    | 5     |
| 46   | VA      | 58    | 47   | VT    | 4     |
| 48   | WA      | 31    | 49   | WI    | 29    |
| 50   | WV      | 9     |      |       |       |
