# Supplementary material for: Liberties and Partisanship under Straining US-China Relations
Source: publisher site journal article supplement (doi:10.1515/spp-2025-0047), 2025-12-13
Supplement: Supplementary file 2 [file tabs_tass_wave1.pdf › suppmaterials_threats/tabs_tass_wave1.pdf]

# TASS - Wave 1 - October 2023

October 16 - 24, 2023 - 3281 U.S. Adults

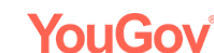

## 1. Actively Seek out News and Information

Choose the statement that best describes you, even if it is not exactly right. In general,...

|                                                                                        | Total   | Gender  |         | Age   |       |         |       | Race    |         |          |
|----------------------------------------------------------------------------------------|---------|---------|---------|-------|-------|---------|-------|---------|---------|----------|
|                                                                                        |         | Male    | Female  | 18-29 | 30-44 | 45-64   | 65+   | White   | Black   | Hispanic |
| I actively seek out news and information                                               | 62%     | 69%     | 55%     | 53%   | 51%   | 64%     | 79%   | 65%     | 61%     | 49%      |
| I bump into the news and information as I do other things or hear about it from others | 38%     | 31%     | 45%     | 47%   | 49%   | 36%     | 21%   | 35%     | 39%     | 51%      |
| Totals                                                                                 | 100%    | 100%    | 100%    | 100%  | 100%  | 100%    | 100%  | 100%    | 100%    | 100%     |
| Unweighted N                                                                           | (3,273) | (1,405) | (1,868) | (731) | (698) | (1,148) | (696) | (1,326) | (1,348) | (409)    |

|                                                                                        | Total   | Party ID |       |       | Registered Voters | Region    |         |         |       |
|----------------------------------------------------------------------------------------|---------|----------|-------|-------|-------------------|-----------|---------|---------|-------|
|                                                                                        |         | Dem      | Rep   | Ind   |                   | Northeast | Midwest | South   | West  |
| I actively seek out news and information                                               | 62%     | 71%      | 63%   | 60%   | 70%               | 64%       | 60%     | 61%     | 62%   |
| I bump into the news and information as I do other things or hear about it from others | 38%     | 29%      | 37%   | 40%   | 30%               | 36%       | 40%     | 39%     | 38%   |
| Totals                                                                                 | 100%    | 100%     | 100%  | 100%  | 100%              | 100%      | 100%    | 100%    | 100%  |
| Unweighted N                                                                           | (3,273) | (1,395)  | (660) | (855) | (2,407)           | (591)     | (618)   | (1,444) | (620) |

# TASS - Wave 1 - October 2023

October 16 - 24, 2023 - 3281 U.S. Adults

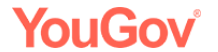

## 2. Trust the News - Report Fairly

How much of the time do you think you can trust the media to report the news fairly?

|                       | Total   | Gender  |         | Age   |       |         |       | Race    |         |          |
|-----------------------|---------|---------|---------|-------|-------|---------|-------|---------|---------|----------|
|                       |         | Male    | Female  | 18-29 | 30-44 | 45-64   | 65+   | White   | Black   | Hispanic |
| Just about always     | 5%      | 6%      | 5%      | 6%    | 5%    | 5%      | 5%    | 4%      | 7%      | 6%       |
| Most of the time      | 33%     | 34%     | 32%     | 38%   | 26%   | 34%     | 35%   | 32%     | 40%     | 35%      |
| Only some of the time | 40%     | 37%     | 43%     | 43%   | 43%   | 39%     | 34%   | 38%     | 41%     | 46%      |
| Almost never          | 22%     | 23%     | 20%     | 13%   | 26%   | 22%     | 26%   | 26%     | 12%     | 14%      |
| Totals                | 100%    | 100%    | 100%    | 100%  | 100%  | 100%    | 100%  | 100%    | 100%    | 101%     |
| Unweighted N          | (3,269) | (1,401) | (1,868) | (732) | (695) | (1,149) | (693) | (1,327) | (1,343) | (409)    |

  

|                       | Total   | Party ID |       |       | Registered Voters | Region    |         |         |       |
|-----------------------|---------|----------|-------|-------|-------------------|-----------|---------|---------|-------|
|                       |         | Dem      | Rep   | Ind   |                   | Northeast | Midwest | South   | West  |
| Just about always     | 5%      | 8%       | 5%    | 4%    | 5%                | 5%        | 4%      | 6%      | 5%    |
| Most of the time      | 33%     | 54%      | 24%   | 25%   | 35%               | 34%       | 32%     | 32%     | 36%   |
| Only some of the time | 40%     | 34%      | 39%   | 44%   | 37%               | 42%       | 43%     | 39%     | 37%   |
| Almost never          | 22%     | 4%       | 33%   | 27%   | 23%               | 19%       | 21%     | 23%     | 22%   |
| Totals                | 100%    | 100%     | 101%  | 100%  | 100%              | 100%      | 100%    | 100%    | 100%  |
| Unweighted N          | (3,269) | (1,396)  | (659) | (854) | (2,404)           | (589)     | (619)   | (1,442) | (619) |

# TASS - Wave 1 - October 2023

October 16 - 24, 2023 - 3281 U.S. Adults



## 3. Trust the News - Report Accurately

How much of the time do you think you can trust the media to report the news accurately?

|                       | Total   | Gender  |         | Age   |       |         |       | Race    |         |          |
|-----------------------|---------|---------|---------|-------|-------|---------|-------|---------|---------|----------|
|                       |         | Male    | Female  | 18-29 | 30-44 | 45-64   | 65+   | White   | Black   | Hispanic |
| Just about always     | 5%      | 6%      | 4%      | 6%    | 6%    | 5%      | 4%    | 4%      | 7%      | 7%       |
| Most of the time      | 34%     | 35%     | 33%     | 36%   | 31%   | 34%     | 35%   | 33%     | 42%     | 33%      |
| Only some of the time | 42%     | 39%     | 45%     | 45%   | 41%   | 44%     | 39%   | 42%     | 40%     | 45%      |
| Almost never          | 19%     | 20%     | 17%     | 13%   | 22%   | 18%     | 22%   | 21%     | 11%     | 15%      |
| Totals                | 100%    | 100%    | 99%     | 100%  | 100%  | 101%    | 100%  | 100%    | 100%    | 100%     |
| Unweighted N          | (3,266) | (1,399) | (1,867) | (729) | (696) | (1,148) | (693) | (1,323) | (1,344) | (409)    |

  

|                       | Total   | Party ID |       |       | Registered Voters |  | Region    |         |         |       |
|-----------------------|---------|----------|-------|-------|-------------------|--|-----------|---------|---------|-------|
|                       |         | Dem      | Rep   | Ind   | Voters            |  | Northeast | Midwest | South   | West  |
| Just about always     | 5%      | 8%       | 5%    | 3%    | 5%                |  | 5%        | 3%      | 6%      | 6%    |
| Most of the time      | 34%     | 56%      | 22%   | 26%   | 36%               |  | 37%       | 32%     | 33%     | 35%   |
| Only some of the time | 42%     | 32%      | 45%   | 48%   | 40%               |  | 40%       | 47%     | 42%     | 40%   |
| Almost never          | 19%     | 4%       | 28%   | 22%   | 19%               |  | 18%       | 18%     | 19%     | 19%   |
| Totals                | 100%    | 100%     | 100%  | 99%   | 100%              |  | 100%      | 100%    | 100%    | 100%  |
| Unweighted N          | (3,266) | (1,391)  | (660) | (853) | (2,406)           |  | (589)     | (616)   | (1,443) | (618) |

# TASS - Wave 1 - October 2023

October 16 - 24, 2023 - 3281 U.S. Adults



## 4. Most Likely - Newsom

Which of the two statements do you think is most likely to be true?

|                                                                                                                                                                                                                    | Total   | Gender  |         | Age   |       |         |       | Race    |         |          |
|--------------------------------------------------------------------------------------------------------------------------------------------------------------------------------------------------------------------|---------|---------|---------|-------|-------|---------|-------|---------|---------|----------|
|                                                                                                                                                                                                                    |         | Male    | Female  | 18-29 | 30-44 | 45-64   | 65+   | White   | Black   | Hispanic |
| California Governor Gavin Newsom recently vetoed a bill previously passed by the California Assembly that charges parents with child abuse for refusing to affirm their children's gender identity.                | 25%     | 28%     | 23%     | 28%   | 25%   | 24%     | 25%   | 27%     | 21%     | 27%      |
| California Governor Gavin Newsom recently vetoed a bill previously passed by the California Assembly that requires judges in custody disputes to consider whether parents affirm their children's gender identity. | 30%     | 34%     | 27%     | 34%   | 27%   | 29%     | 32%   | 32%     | 27%     | 26%      |
| Unsure                                                                                                                                                                                                             | 44%     | 39%     | 50%     | 37%   | 48%   | 48%     | 42%   | 41%     | 52%     | 47%      |
| Totals                                                                                                                                                                                                             | 99%     | 101%    | 100%    | 99%   | 100%  | 101%    | 99%   | 100%    | 100%    | 100%     |
| Unweighted N                                                                                                                                                                                                       | (3,267) | (1,400) | (1,867) | (729) | (697) | (1,146) | (695) | (1,323) | (1,343) | (411)    |

|                                                                                                                                                                                                                    | Total   | Party ID |       |       | Registered Voters | Region |           |         |       |
|--------------------------------------------------------------------------------------------------------------------------------------------------------------------------------------------------------------------|---------|----------|-------|-------|-------------------|--------|-----------|---------|-------|
|                                                                                                                                                                                                                    |         | Dem      | Rep   | Ind   |                   | Voters | Northeast | Midwest | South |
| California Governor Gavin Newsom recently vetoed a bill previously passed by the California Assembly that charges parents with child abuse for refusing to affirm their children’s gender identity.                | 25%     | 19%      | 36%   | 25%   | 27%               | 26%    | 22%       | 28%     | 24%   |
| California Governor Gavin Newsom recently vetoed a bill previously passed by the California Assembly that requires judges in custody disputes to consider whether parents affirm their children’s gender identity. | 30%     | 36%      | 30%   | 30%   | 33%               | 29%    | 30%       | 30%     | 32%   |
| Unsure                                                                                                                                                                                                             | 44%     | 45%      | 34%   | 45%   | 40%               | 45%    | 48%       | 42%     | 44%   |
| Totals                                                                                                                                                                                                             | 99%     | 100%     | 100%  | 100%  | 100%              | 100%   | 100%      | 100%    | 100%  |
| Unweighted N                                                                                                                                                                                                       | (3,267) | (1,392)  | (661) | (851) | (2,404)           | (589)  | (619)     | (1,444) | (615) |

# TASS - Wave 1 - October 2023

## October 16 - 24, 2023 - 3281 U.S. Adults

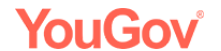

### 5. Most Likely - Trump and Arizona

Which of the two statements do you think is most likely to be true?

|                                                                                                                                                                                                                                                   | Total   | Gender  |         | Age   |       |         |       | Race    |         |          |
|---------------------------------------------------------------------------------------------------------------------------------------------------------------------------------------------------------------------------------------------------|---------|---------|---------|-------|-------|---------|-------|---------|---------|----------|
|                                                                                                                                                                                                                                                   |         | Male    | Female  | 18-29 | 30-44 | 45-64   | 65+   | White   | Black   | Hispanic |
| It was eventually announced that Donald Trump lost Maricopa County, Arizona in the 2020 Presidential Election. This was despite the efforts of Republican election officials in that county attempting to falsely show that Donald Trump had won. | 32%     | 31%     | 32%     | 31%   | 27%   | 34%     | 34%   | 31%     | 36%     | 32%      |
| It was eventually announced that Donald Trump lost Maricopa County, Arizona in the 2020 Presidential Election. This matched the conclusion of Republican officials in that county, who insisted from the beginning that Donald Trump had lost.    | 32%     | 36%     | 29%     | 33%   | 29%   | 28%     | 41%   | 35%     | 26%     | 28%      |
| Unsure                                                                                                                                                                                                                                            | 36%     | 33%     | 39%     | 36%   | 45%   | 38%     | 24%   | 34%     | 38%     | 40%      |
| Totals                                                                                                                                                                                                                                            | 100%    | 100%    | 100%    | 100%  | 101%  | 100%    | 99%   | 100%    | 100%    | 100%     |
| Unweighted N                                                                                                                                                                                                                                      | (3,273) | (1,401) | (1,872) | (729) | (699) | (1,150) | (695) | (1,327) | (1,346) | (409)    |

|                                                                                                                                                                                                                                                   | Total | Party ID |     |     | Registered Voters |  | Region    |         |       |      |
|---------------------------------------------------------------------------------------------------------------------------------------------------------------------------------------------------------------------------------------------------|-------|----------|-----|-----|-------------------|--|-----------|---------|-------|------|
|                                                                                                                                                                                                                                                   |       | Dem      | Rep | Ind | Voters            |  | Northeast | Midwest | South | West |
| It was eventually announced that Donald Trump lost Maricopa County, Arizona in the 2020 Presidential Election. This was despite the efforts of Republican election officials in that county attempting to falsely show that Donald Trump had won. | 32%   | 42%      | 26% | 31% | 33%               |  | 33%       | 30%     | 32%   | 33%  |
| It was eventually announced that Donald Trump lost Maricopa County, Arizona in the 2020 Presidential Election. This matched the conclusion of Republican officials in that county, who insisted from the beginning that Donald Trump had lost.    | 32%   | 35%      | 36% | 31% | 37%               |  | 33%       | 37%     | 29%   | 33%  |

continued on the next page . . .

| continued from previous page |         |          |       |       |                   |           |         |         |       |
|------------------------------|---------|----------|-------|-------|-------------------|-----------|---------|---------|-------|
|                              | Total   | Party ID |       |       | Registered Voters | Region    |         |         |       |
|                              |         | Dem      | Rep   | Ind   | Voters            | Northeast | Midwest | South   | West  |
| Unsure                       | 36%     | 23%      | 39%   | 38%   | 30%               | 34%       | 34%     | 39%     | 34%   |
| Totals                       | 100%    | 100%     | 101%  | 100%  | 100%              | 100%      | 101%    | 100%    | 100%  |
| Unweighted N                 | (3,273) | (1,394)  | (659) | (857) | (2,406)           | (592)     | (620)   | (1,443) | (618) |

**TASS - Wave 1 - October 2023**  
**October 16 - 24, 2023 - 3281 U.S. Adults**

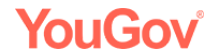

**6. Most Likely - Judge Cannon**

Which of the two statements do you think is most likely to be true?

|                                                                                                                                                                                 | Total   | Gender  |         | Age   |       |         |       | Race    |         |          |
|---------------------------------------------------------------------------------------------------------------------------------------------------------------------------------|---------|---------|---------|-------|-------|---------|-------|---------|---------|----------|
|                                                                                                                                                                                 |         | Male    | Female  | 18-29 | 30-44 | 45-64   | 65+   | White   | Black   | Hispanic |
| U.S. District Judge Aileen Cannon, who is overseeing one of Donald Trump's indictments and was appointed by Trump, has been forced by insiders to recuse herself from the case. | 19%     | 17%     | 21%     | 26%   | 24%   | 15%     | 12%   | 16%     | 22%     | 23%      |
| U.S. District Judge Aileen Cannon, who is overseeing one of Donald Trump's indictments and was appointed by Trump, is nonetheless allowed to continue overseeing the case.      | 44%     | 51%     | 38%     | 34%   | 33%   | 46%     | 64%   | 49%     | 37%     | 36%      |
| Unsure                                                                                                                                                                          | 37%     | 32%     | 41%     | 40%   | 43%   | 39%     | 24%   | 35%     | 41%     | 41%      |
| Totals                                                                                                                                                                          | 100%    | 100%    | 100%    | 100%  | 100%  | 100%    | 100%  | 100%    | 100%    | 100%     |
| Unweighted N                                                                                                                                                                    | (3,264) | (1,398) | (1,866) | (728) | (697) | (1,144) | (695) | (1,327) | (1,340) | (407)    |

|                                                                                                                                                                                 | Total   | Party ID |       |       | Registered Voters |  | Region    |         |         |       |
|---------------------------------------------------------------------------------------------------------------------------------------------------------------------------------|---------|----------|-------|-------|-------------------|--|-----------|---------|---------|-------|
|                                                                                                                                                                                 |         | Dem      | Rep   | Ind   | Voters            |  | Northeast | Midwest | South   | West  |
| U.S. District Judge Aileen Cannon, who is overseeing one of Donald Trump's indictments and was appointed by Trump, has been forced by insiders to recuse herself from the case. | 19%     | 17%      | 23%   | 19%   | 19%               |  | 17%       | 17%     | 21%     | 19%   |
| U.S. District Judge Aileen Cannon, who is overseeing one of Donald Trump's indictments and was appointed by Trump, is nonetheless allowed to continue overseeing the case.      | 44%     | 55%      | 42%   | 44%   | 51%               |  | 47%       | 43%     | 43%     | 44%   |
| Unsure                                                                                                                                                                          | 37%     | 28%      | 36%   | 37%   | 30%               |  | 36%       | 39%     | 36%     | 37%   |
| Totals                                                                                                                                                                          | 100%    | 100%     | 101%  | 100%  | 100%              |  | 100%      | 99%     | 100%    | 100%  |
| Unweighted N                                                                                                                                                                    | (3,264) | (1,389)  | (660) | (851) | (2,402)           |  | (591)     | (619)   | (1,438) | (616) |

**TASS - Wave 1 - October 2023**  
**October 16 - 24, 2023 - 3281 U.S. Adults**



**7. Most Likely - Missouri State Senators**

Which of the two statements do you think is most likely to be true?

|                                                                                                                              | Total   | Gender  |         | Age   |       |         |       | Race    |         |          |
|------------------------------------------------------------------------------------------------------------------------------|---------|---------|---------|-------|-------|---------|-------|---------|---------|----------|
|                                                                                                                              |         | Male    | Female  | 18-29 | 30-44 | 45-64   | 65+   | White   | Black   | Hispanic |
| A recent video showed Republican Missouri state senators using flamethrowers to burn books.                                  | 25%     | 24%     | 26%     | 27%   | 25%   | 24%     | 26%   | 24%     | 29%     | 27%      |
| A recent video showed Republican Missouri state senators using flamethrowers to burn empty boxes before auctioning them off. | 18%     | 21%     | 15%     | 28%   | 18%   | 17%     | 11%   | 17%     | 18%     | 20%      |
| Unsure                                                                                                                       | 57%     | 55%     | 58%     | 45%   | 57%   | 60%     | 63%   | 59%     | 53%     | 53%      |
| Totals                                                                                                                       | 100%    | 100%    | 99%     | 100%  | 100%  | 101%    | 100%  | 100%    | 100%    | 100%     |
| Unweighted N                                                                                                                 | (3,270) | (1,403) | (1,867) | (727) | (700) | (1,148) | (695) | (1,325) | (1,343) | (411)    |

|                                                                                                                              | Total   | Party ID |       |       | Registered Voters | Region    |         |         |       |
|------------------------------------------------------------------------------------------------------------------------------|---------|----------|-------|-------|-------------------|-----------|---------|---------|-------|
|                                                                                                                              |         | Dem      | Rep   | Ind   |                   | Northeast | Midwest | South   | West  |
| A recent video showed Republican Missouri state senators using flamethrowers to burn books.                                  | 25%     | 36%      | 20%   | 22%   | 27%               | 23%       | 24%     | 26%     | 27%   |
| A recent video showed Republican Missouri state senators using flamethrowers to burn empty boxes before auctioning them off. | 18%     | 17%      | 22%   | 17%   | 19%               | 21%       | 18%     | 18%     | 16%   |
| Unsure                                                                                                                       | 57%     | 47%      | 58%   | 61%   | 54%               | 56%       | 59%     | 55%     | 57%   |
| Totals                                                                                                                       | 100%    | 100%     | 100%  | 100%  | 100%              | 100%      | 101%    | 99%     | 100%  |
| Unweighted N                                                                                                                 | (3,270) | (1,393)  | (661) | (855) | (2,405)           | (590)     | (617)   | (1,443) | (620) |



# TASS - Wave 1 - October 2023

## October 16 - 24, 2023 - 3281 U.S. Adults

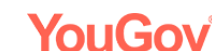

### 8. Most Likely - Trump and 2024

Which of the two statements do you think is most likely to be true?

|                                                                                                                                                                                                                    | Total   | Gender  |         | Age   |       |         |       | Race    |         |          |
|--------------------------------------------------------------------------------------------------------------------------------------------------------------------------------------------------------------------|---------|---------|---------|-------|-------|---------|-------|---------|---------|----------|
|                                                                                                                                                                                                                    |         | Male    | Female  | 18-29 | 30-44 | 45-64   | 65+   | White   | Black   | Hispanic |
| Congress has announced that they will not include Donald Trump on the 2024 ballot, even if he wins the GOP nomination. They will begin printing ballots, without Trump's name, in October 2023.                    | 10%     | 10%     | 10%     | 22%   | 12%   | 4%      | 5%    | 9%      | 16%     | 13%      |
| Although some organizations are working to block Donald Trump from appearing on the 2024 ballot, Congress has not announced that they will print ballots without his name. Congress does not administer elections. | 62%     | 66%     | 59%     | 44%   | 56%   | 67%     | 80%   | 68%     | 48%     | 50%      |
| Unsure                                                                                                                                                                                                             | 27%     | 24%     | 31%     | 33%   | 32%   | 28%     | 16%   | 23%     | 36%     | 37%      |
| Totals                                                                                                                                                                                                             | 99%     | 100%    | 100%    | 99%   | 100%  | 99%     | 101%  | 100%    | 100%    | 100%     |
| Unweighted N                                                                                                                                                                                                       | (3,271) | (1,402) | (1,869) | (730) | (698) | (1,149) | (694) | (1,328) | (1,342) | (410)    |

|                                                                                                                                                                                                                    | Total   | Party ID |       |       | Registered Voters | Region    |         |         |       |
|--------------------------------------------------------------------------------------------------------------------------------------------------------------------------------------------------------------------|---------|----------|-------|-------|-------------------|-----------|---------|---------|-------|
|                                                                                                                                                                                                                    |         | Dem      | Rep   | Ind   | Voters            | Northeast | Midwest | South   | West  |
| Congress has announced that they will not include Donald Trump on the 2024 ballot, even if he wins the GOP nomination. They will begin printing ballots, without Trump's name, in October 2023.                    | 10%     | 13%      | 10%   | 8%    | 9%                | 12%       | 8%      | 12%     | 9%    |
| Although some organizations are working to block Donald Trump from appearing on the 2024 ballot, Congress has not announced that they will print ballots without his name. Congress does not administer elections. | 62%     | 63%      | 70%   | 63%   | 69%               | 61%       | 67%     | 60%     | 62%   |
| Unsure                                                                                                                                                                                                             | 27%     | 23%      | 20%   | 29%   | 21%               | 27%       | 25%     | 28%     | 28%   |
| Totals                                                                                                                                                                                                             | 99%     | 99%      | 100%  | 100%  | 99%               | 100%      | 100%    | 100%    | 99%   |
| Unweighted N                                                                                                                                                                                                       | (3,271) | (1,391)  | (660) | (854) | (2,404)           | (591)     | (619)   | (1,441) | (620) |

**TASS - Wave 1 - October 2023**  
**October 16 - 24, 2023 - 3281 U.S. Adults**



**9A. Area of Residence — This area is a reflection of me**

Thinking about the area within a mile of your place of residence, please indicate whether you agree or disagree with the following statements:

|                   | Total   | Gender  |         | Age   |       |         |       | Race    |         |          |
|-------------------|---------|---------|---------|-------|-------|---------|-------|---------|---------|----------|
|                   |         | Male    | Female  | 18-29 | 30-44 | 45-64   | 65+   | White   | Black   | Hispanic |
| Strongly agree    | 8%      | 9%      | 8%      | 8%    | 8%    | 8%      | 8%    | 8%      | 8%      | 9%       |
| Agree             | 19%     | 19%     | 19%     | 20%   | 15%   | 18%     | 23%   | 20%     | 18%     | 18%      |
| Somewhat agree    | 30%     | 31%     | 29%     | 32%   | 29%   | 29%     | 33%   | 31%     | 30%     | 29%      |
| Somewhat disagree | 19%     | 19%     | 20%     | 18%   | 23%   | 19%     | 16%   | 19%     | 18%     | 23%      |
| Disagree          | 13%     | 12%     | 14%     | 13%   | 13%   | 13%     | 12%   | 13%     | 13%     | 12%      |
| Strongly disagree | 10%     | 10%     | 11%     | 9%    | 12%   | 13%     | 7%    | 10%     | 12%     | 9%       |
| Totals            | 99%     | 100%    | 101%    | 100%  | 100%  | 100%    | 99%   | 101%    | 99%     | 100%     |
| Unweighted N      | (3,265) | (1,399) | (1,866) | (732) | (696) | (1,145) | (692) | (1,320) | (1,345) | (410)    |

|                   | Total   | Party ID |       |       | Registered Voters |  | Region    |         |         |       |
|-------------------|---------|----------|-------|-------|-------------------|--|-----------|---------|---------|-------|
|                   |         | Dem      | Rep   | Ind   | Voters            |  | Northeast | Midwest | South   | West  |
| Strongly agree    | 8%      | 8%       | 11%   | 6%    | 9%                |  | 9%        | 8%      | 8%      | 8%    |
| Agree             | 19%     | 21%      | 21%   | 16%   | 20%               |  | 19%       | 18%     | 21%     | 17%   |
| Somewhat agree    | 30%     | 31%      | 29%   | 31%   | 30%               |  | 31%       | 28%     | 30%     | 32%   |
| Somewhat disagree | 19%     | 16%      | 20%   | 21%   | 18%               |  | 19%       | 19%     | 20%     | 19%   |
| Disagree          | 13%     | 14%      | 10%   | 13%   | 13%               |  | 11%       | 16%     | 12%     | 13%   |
| Strongly disagree | 10%     | 10%      | 8%    | 12%   | 10%               |  | 11%       | 11%     | 10%     | 11%   |
| Totals            | 99%     | 100%     | 99%   | 99%   | 100%              |  | 100%      | 100%    | 101%    | 100%  |
| Unweighted N      | (3,265) | (1,394)  | (655) | (852) | (2,400)           |  | (591)     | (616)   | (1,440) | (618) |

**TASS - Wave 1 - October 2023**  
**October 16 - 24, 2023 - 3281 U.S. Adults**



**9B. Area of Residence — I don't really fit in with the people who live here**

Thinking about the area within a mile of your place of residence, please indicate whether you agree or disagree with the following statements:

|                   | Total   | Gender  |         | Age   |       |         |       | Race    |         |          |
|-------------------|---------|---------|---------|-------|-------|---------|-------|---------|---------|----------|
|                   |         | Male    | Female  | 18-29 | 30-44 | 45-64   | 65+   | White   | Black   | Hispanic |
| Strongly agree    | 8%      | 7%      | 9%      | 8%    | 10%   | 9%      | 4%    | 7%      | 11%     | 10%      |
| Agree             | 12%     | 12%     | 11%     | 16%   | 12%   | 11%     | 8%    | 11%     | 13%     | 11%      |
| Somewhat agree    | 22%     | 22%     | 22%     | 24%   | 25%   | 21%     | 16%   | 21%     | 22%     | 22%      |
| Somewhat disagree | 24%     | 24%     | 24%     | 27%   | 24%   | 23%     | 22%   | 24%     | 21%     | 27%      |
| Disagree          | 21%     | 21%     | 21%     | 17%   | 17%   | 23%     | 28%   | 22%     | 21%     | 21%      |
| Strongly disagree | 14%     | 14%     | 13%     | 8%    | 12%   | 13%     | 22%   | 16%     | 12%     | 10%      |
| Totals            | 101%    | 100%    | 100%    | 100%  | 100%  | 100%    | 100%  | 101%    | 100%    | 101%     |
| Unweighted N      | (3,264) | (1,397) | (1,867) | (731) | (695) | (1,146) | (692) | (1,324) | (1,339) | (411)    |

|                   | Total   | Party ID |       |       | Registered Voters |  | Region    |         |         |       |
|-------------------|---------|----------|-------|-------|-------------------|--|-----------|---------|---------|-------|
|                   |         | Dem      | Rep   | Ind   | Voters            |  | Northeast | Midwest | South   | West  |
| Strongly agree    | 8%      | 9%       | 7%    | 8%    | 8%                |  | 8%        | 8%      | 7%      | 9%    |
| Agree             | 12%     | 13%      | 8%    | 13%   | 11%               |  | 11%       | 9%      | 12%     | 12%   |
| Somewhat agree    | 22%     | 19%      | 22%   | 24%   | 22%               |  | 22%       | 21%     | 21%     | 23%   |
| Somewhat disagree | 24%     | 24%      | 23%   | 24%   | 23%               |  | 23%       | 24%     | 24%     | 24%   |
| Disagree          | 21%     | 23%      | 21%   | 20%   | 21%               |  | 21%       | 22%     | 21%     | 20%   |
| Strongly disagree | 14%     | 12%      | 18%   | 12%   | 15%               |  | 14%       | 16%     | 14%     | 12%   |
| Totals            | 101%    | 100%     | 99%   | 101%  | 100%              |  | 99%       | 100%    | 99%     | 100%  |
| Unweighted N      | (3,264) | (1,391)  | (657) | (851) | (2,399)           |  | (591)     | (616)   | (1,439) | (618) |

**TASS - Wave 1 - October 2023**  
**October 16 - 24, 2023 - 3281 U.S. Adults**



**9C. Area of Residence — I would move somewhere else if I could**

Thinking about the area within a mile of your place of residence, please indicate whether you agree or disagree with the following statements:

|                   | Total   | Gender  |         | Age   |       |         |       | Race    |         |          |
|-------------------|---------|---------|---------|-------|-------|---------|-------|---------|---------|----------|
|                   |         | Male    | Female  | 18-29 | 30-44 | 45-64   | 65+   | White   | Black   | Hispanic |
| Strongly agree    | 20%     | 16%     | 24%     | 17%   | 25%   | 24%     | 12%   | 19%     | 24%     | 22%      |
| Agree             | 18%     | 18%     | 17%     | 21%   | 16%   | 19%     | 14%   | 17%     | 21%     | 18%      |
| Somewhat agree    | 21%     | 21%     | 20%     | 27%   | 22%   | 19%     | 17%   | 20%     | 23%     | 23%      |
| Somewhat disagree | 16%     | 19%     | 14%     | 17%   | 21%   | 13%     | 16%   | 17%     | 13%     | 17%      |
| Disagree          | 14%     | 15%     | 14%     | 13%   | 11%   | 14%     | 21%   | 16%     | 11%     | 14%      |
| Strongly disagree | 11%     | 10%     | 11%     | 6%    | 6%    | 11%     | 19%   | 12%     | 8%      | 8%       |
| Totals            | 100%    | 99%     | 100%    | 101%  | 101%  | 100%    | 99%   | 101%    | 100%    | 102%     |
| Unweighted N      | (3,265) | (1,396) | (1,869) | (731) | (696) | (1,147) | (691) | (1,323) | (1,340) | (411)    |

|                   | Total   | Party ID |       |       | Registered Voters |  | Region    |         |         |       |
|-------------------|---------|----------|-------|-------|-------------------|--|-----------|---------|---------|-------|
|                   |         | Dem      | Rep   | Ind   | Voters            |  | Northeast | Midwest | South   | West  |
| Strongly agree    | 20%     | 20%      | 19%   | 20%   | 20%               |  | 17%       | 23%     | 17%     | 24%   |
| Agree             | 18%     | 19%      | 16%   | 18%   | 17%               |  | 19%       | 16%     | 19%     | 17%   |
| Somewhat agree    | 21%     | 21%      | 18%   | 22%   | 20%               |  | 22%       | 18%     | 22%     | 20%   |
| Somewhat disagree | 16%     | 15%      | 17%   | 17%   | 16%               |  | 18%       | 20%     | 15%     | 14%   |
| Disagree          | 14%     | 16%      | 15%   | 14%   | 15%               |  | 14%       | 15%     | 14%     | 14%   |
| Strongly disagree | 11%     | 9%       | 14%   | 9%    | 11%               |  | 10%       | 8%      | 13%     | 10%   |
| Totals            | 100%    | 100%     | 99%   | 100%  | 99%               |  | 100%      | 100%    | 100%    | 99%   |
| Unweighted N      | (3,265) | (1,391)  | (656) | (854) | (2,400)           |  | (590)     | (617)   | (1,440) | (618) |

**TASS - Wave 1 - October 2023**  
**October 16 - 24, 2023 - 3281 U.S. Adults**



**9D. Area of Residence — This is my favorite place to be**

Thinking about the area within a mile of your place of residence, please indicate whether you agree or disagree with the following statements:

|                   | Total   | Gender  |         | Age   |       |         |       | Race    |         |          |
|-------------------|---------|---------|---------|-------|-------|---------|-------|---------|---------|----------|
|                   |         | Male    | Female  | 18-29 | 30-44 | 45-64   | 65+   | White   | Black   | Hispanic |
| Strongly agree    | 12%     | 13%     | 12%     | 11%   | 11%   | 13%     | 14%   | 13%     | 12%     | 13%      |
| Agree             | 22%     | 23%     | 21%     | 23%   | 17%   | 20%     | 29%   | 22%     | 23%     | 21%      |
| Somewhat agree    | 29%     | 28%     | 29%     | 32%   | 29%   | 25%     | 31%   | 28%     | 28%     | 30%      |
| Somewhat disagree | 18%     | 18%     | 17%     | 16%   | 20%   | 19%     | 14%   | 18%     | 15%     | 17%      |
| Disagree          | 11%     | 11%     | 11%     | 10%   | 11%   | 14%     | 7%    | 11%     | 12%     | 11%      |
| Strongly disagree | 9%      | 7%      | 10%     | 7%    | 11%   | 10%     | 5%    | 8%      | 11%     | 7%       |
| Totals            | 101%    | 100%    | 100%    | 99%   | 99%   | 101%    | 100%  | 100%    | 101%    | 99%      |
| Unweighted N      | (3,266) | (1,402) | (1,864) | (731) | (696) | (1,148) | (691) | (1,325) | (1,341) | (410)    |

|                   | Total   | Party ID |       |       | Registered Voters |  | Region    |         |         |       |
|-------------------|---------|----------|-------|-------|-------------------|--|-----------|---------|---------|-------|
|                   |         | Dem      | Rep   | Ind   | Voters            |  | Northeast | Midwest | South   | West  |
| Strongly agree    | 12%     | 11%      | 18%   | 9%    | 13%               |  | 11%       | 11%     | 14%     | 11%   |
| Agree             | 22%     | 23%      | 23%   | 21%   | 22%               |  | 24%       | 19%     | 22%     | 22%   |
| Somewhat agree    | 29%     | 31%      | 27%   | 27%   | 28%               |  | 27%       | 29%     | 29%     | 30%   |
| Somewhat disagree | 18%     | 16%      | 16%   | 21%   | 18%               |  | 21%       | 19%     | 16%     | 16%   |
| Disagree          | 11%     | 12%      | 8%    | 11%   | 11%               |  | 9%        | 12%     | 11%     | 12%   |
| Strongly disagree | 9%      | 7%       | 7%    | 10%   | 8%                |  | 8%        | 10%     | 8%      | 8%    |
| Totals            | 101%    | 100%     | 99%   | 99%   | 100%              |  | 100%      | 100%    | 100%    | 99%   |
| Unweighted N      | (3,266) | (1,391)  | (658) | (853) | (2,399)           |  | (588)     | (618)   | (1,440) | (620) |

**9E. Area of Residence — I really miss it when I am away too long**

Thinking about the area within a mile of your place of residence, please indicate whether you agree or disagree with the following statements:

|                   | Total   | Gender  |         | Age   |       |         |       | Race    |         |          |
|-------------------|---------|---------|---------|-------|-------|---------|-------|---------|---------|----------|
|                   |         | Male    | Female  | 18-29 | 30-44 | 45-64   | 65+   | White   | Black   | Hispanic |
| Strongly agree    | 13%     | 13%     | 13%     | 11%   | 12%   | 14%     | 15%   | 13%     | 14%     | 14%      |
| Agree             | 26%     | 25%     | 26%     | 26%   | 22%   | 24%     | 33%   | 27%     | 22%     | 25%      |
| Somewhat agree    | 29%     | 31%     | 27%     | 33%   | 33%   | 25%     | 26%   | 28%     | 31%     | 28%      |
| Somewhat disagree | 15%     | 15%     | 14%     | 14%   | 15%   | 16%     | 13%   | 15%     | 12%     | 17%      |
| Disagree          | 10%     | 10%     | 11%     | 11%   | 10%   | 12%     | 9%    | 10%     | 13%     | 11%      |
| Strongly disagree | 7%      | 6%      | 8%      | 4%    | 9%    | 9%      | 5%    | 7%      | 8%      | 5%       |
| Totals            | 100%    | 100%    | 99%     | 99%   | 101%  | 100%    | 101%  | 100%    | 100%    | 100%     |
| Unweighted N      | (3,260) | (1,397) | (1,863) | (732) | (697) | (1,138) | (693) | (1,323) | (1,337) | (411)    |

|                   | Total   | Party ID |       |       | Registered Voters |  | Region    |         |         |       |
|-------------------|---------|----------|-------|-------|-------------------|--|-----------|---------|---------|-------|
|                   |         | Dem      | Rep   | Ind   | Voters            |  | Northeast | Midwest | South   | West  |
| Strongly agree    | 13%     | 11%      | 18%   | 11%   | 14%               |  | 11%       | 14%     | 13%     | 13%   |
| Agree             | 26%     | 28%      | 27%   | 25%   | 26%               |  | 27%       | 22%     | 27%     | 25%   |
| Somewhat agree    | 29%     | 31%      | 25%   | 29%   | 28%               |  | 27%       | 30%     | 30%     | 28%   |
| Somewhat disagree | 15%     | 14%      | 16%   | 14%   | 14%               |  | 18%       | 12%     | 13%     | 17%   |
| Disagree          | 10%     | 10%      | 8%    | 13%   | 10%               |  | 10%       | 13%     | 10%     | 9%    |
| Strongly disagree | 7%      | 5%       | 7%    | 9%    | 7%                |  | 7%        | 8%      | 6%      | 7%    |
| Totals            | 100%    | 99%      | 101%  | 101%  | 99%               |  | 100%      | 99%     | 99%     | 99%   |
| Unweighted N      | (3,260) | (1,387)  | (657) | (851) | (2,396)           |  | (590)     | (616)   | (1,437) | (617) |

**TASS - Wave 1 - October 2023**  
**October 16 - 24, 2023 - 3281 U.S. Adults**

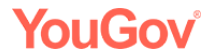

**9F. Area of Residence — I feel happiest when I am here**

Thinking about the area within a mile of your place of residence, please indicate whether you agree or disagree with the following statements:

|                   | Total   | Gender  |         | Age   |       |         |       | Race    |         |          |
|-------------------|---------|---------|---------|-------|-------|---------|-------|---------|---------|----------|
|                   |         | Male    | Female  | 18-29 | 30-44 | 45-64   | 65+   | White   | Black   | Hispanic |
| Strongly agree    | 14%     | 15%     | 13%     | 14%   | 15%   | 14%     | 15%   | 15%     | 14%     | 15%      |
| Agree             | 27%     | 27%     | 27%     | 28%   | 22%   | 24%     | 37%   | 29%     | 26%     | 25%      |
| Somewhat agree    | 29%     | 30%     | 27%     | 29%   | 29%   | 28%     | 28%   | 28%     | 29%     | 29%      |
| Somewhat disagree | 15%     | 14%     | 16%     | 14%   | 17%   | 17%     | 11%   | 15%     | 14%     | 16%      |
| Disagree          | 8%      | 8%      | 9%      | 9%    | 9%    | 10%     | 6%    | 8%      | 9%      | 10%      |
| Strongly disagree | 7%      | 6%      | 7%      | 6%    | 8%    | 8%      | 3%    | 6%      | 8%      | 5%       |
| Totals            | 100%    | 100%    | 99%     | 100%  | 100%  | 101%    | 100%  | 101%    | 100%    | 100%     |
| Unweighted N      | (3,260) | (1,397) | (1,863) | (731) | (695) | (1,142) | (692) | (1,317) | (1,342) | (411)    |

|                   | Total   | Party ID |       |       | Registered Voters |  | Region    |         |         |       |
|-------------------|---------|----------|-------|-------|-------------------|--|-----------|---------|---------|-------|
|                   |         | Dem      | Rep   | Ind   | Voters            |  | Northeast | Midwest | South   | West  |
| Strongly agree    | 14%     | 14%      | 18%   | 11%   | 16%               |  | 12%       | 14%     | 15%     | 15%   |
| Agree             | 27%     | 29%      | 30%   | 26%   | 28%               |  | 31%       | 26%     | 26%     | 26%   |
| Somewhat agree    | 29%     | 31%      | 27%   | 28%   | 28%               |  | 25%       | 31%     | 29%     | 28%   |
| Somewhat disagree | 15%     | 13%      | 13%   | 17%   | 14%               |  | 15%       | 13%     | 15%     | 16%   |
| Disagree          | 8%      | 9%       | 7%    | 9%    | 8%                |  | 11%       | 8%      | 9%      | 6%    |
| Strongly disagree | 7%      | 5%       | 5%    | 9%    | 6%                |  | 6%        | 7%      | 5%      | 8%    |
| Totals            | 100%    | 101%     | 100%  | 100%  | 100%              |  | 100%      | 99%     | 99%     | 99%   |
| Unweighted N      | (3,260) | (1,391)  | (657) | (850) | (2,397)           |  | (591)     | (612)   | (1,440) | (617) |

**10A. Rural Areas — Rural areas are boring and monotonous compared to life in other places**

Please indicate how strongly you agree or disagree with the following statements:

|                   | Total   | Gender  |         | Age   |       |         |       | Race    |         |          |
|-------------------|---------|---------|---------|-------|-------|---------|-------|---------|---------|----------|
|                   |         | Male    | Female  | 18-29 | 30-44 | 45-64   | 65+   | White   | Black   | Hispanic |
| Strongly agree    | 6%      | 7%      | 5%      | 10%   | 8%    | 5%      | 2%    | 5%      | 9%      | 7%       |
| Agree             | 10%     | 10%     | 11%     | 17%   | 12%   | 7%      | 6%    | 7%      | 16%     | 16%      |
| Somewhat agree    | 24%     | 24%     | 24%     | 30%   | 28%   | 23%     | 15%   | 21%     | 26%     | 27%      |
| Somewhat disagree | 24%     | 24%     | 24%     | 23%   | 25%   | 21%     | 27%   | 24%     | 23%     | 26%      |
| Disagree          | 20%     | 20%     | 21%     | 16%   | 13%   | 23%     | 29%   | 23%     | 17%     | 16%      |
| Strongly disagree | 16%     | 15%     | 16%     | 5%    | 15%   | 20%     | 20%   | 19%     | 9%      | 8%       |
| Totals            | 100%    | 100%    | 101%    | 101%  | 101%  | 99%     | 99%   | 99%     | 100%    | 100%     |
| Unweighted N      | (3,204) | (1,370) | (1,834) | (701) | (680) | (1,132) | (691) | (1,306) | (1,303) | (405)    |

|                   | Total   | Party ID |       |       | Registered Voters | Region    |         |         |       |
|-------------------|---------|----------|-------|-------|-------------------|-----------|---------|---------|-------|
|                   |         | Dem      | Rep   | Ind   |                   | Northeast | Midwest | South   | West  |
| Strongly agree    | 6%      | 8%       | 6%    | 4%    | 6%                | 8%        | 4%      | 7%      | 5%    |
| Agree             | 10%     | 13%      | 8%    | 9%    | 10%               | 10%       | 9%      | 11%     | 9%    |
| Somewhat agree    | 24%     | 26%      | 19%   | 26%   | 24%               | 22%       | 26%     | 23%     | 25%   |
| Somewhat disagree | 24%     | 26%      | 19%   | 24%   | 22%               | 26%       | 24%     | 24%     | 22%   |
| Disagree          | 20%     | 18%      | 24%   | 21%   | 21%               | 20%       | 20%     | 19%     | 23%   |
| Strongly disagree | 16%     | 9%       | 24%   | 16%   | 17%               | 15%       | 16%     | 15%     | 16%   |
| Totals            | 100%    | 100%     | 100%  | 100%  | 100%              | 101%      | 99%     | 99%     | 100%  |
| Unweighted N      | (3,204) | (1,366)  | (647) | (841) | (2,355)           | (582)     | (606)   | (1,410) | (606) |



**10B. Rural Areas — Big cities provide people with more opportunities to get ahead in life than other places do**

Please indicate how strongly you agree or disagree with the following statements:

|                   | Total   | Gender  |         | Age   |       |         |       | Race    |         |          |
|-------------------|---------|---------|---------|-------|-------|---------|-------|---------|---------|----------|
|                   |         | Male    | Female  | 18-29 | 30-44 | 45-64   | 65+   | White   | Black   | Hispanic |
| Strongly agree    | 14%     | 15%     | 13%     | 18%   | 18%   | 12%     | 7%    | 11%     | 21%     | 19%      |
| Agree             | 26%     | 25%     | 26%     | 31%   | 22%   | 24%     | 27%   | 25%     | 30%     | 25%      |
| Somewhat agree    | 35%     | 35%     | 35%     | 29%   | 36%   | 37%     | 36%   | 35%     | 32%     | 35%      |
| Somewhat disagree | 15%     | 13%     | 16%     | 14%   | 14%   | 15%     | 16%   | 16%     | 9%      | 13%      |
| Disagree          | 7%      | 6%      | 7%      | 5%    | 5%    | 7%      | 10%   | 7%      | 5%      | 6%       |
| Strongly disagree | 5%      | 5%      | 4%      | 3%    | 5%    | 5%      | 4%    | 5%      | 3%      | 2%       |
| Totals            | 102%    | 99%     | 101%    | 100%  | 100%  | 100%    | 100%  | 99%     | 100%    | 100%     |
| Unweighted N      | (3,208) | (1,371) | (1,837) | (708) | (682) | (1,128) | (690) | (1,309) | (1,309) | (402)    |

|                   | Total   | Party ID |       |       | Registered Voters |  | Region    |         |         |       |
|-------------------|---------|----------|-------|-------|-------------------|--|-----------|---------|---------|-------|
|                   |         | Dem      | Rep   | Ind   | Voters            |  | Northeast | Midwest | South   | West  |
| Strongly agree    | 14%     | 16%      | 11%   | 15%   | 15%               |  | 15%       | 14%     | 14%     | 12%   |
| Agree             | 26%     | 32%      | 24%   | 23%   | 26%               |  | 24%       | 23%     | 27%     | 27%   |
| Somewhat agree    | 35%     | 36%      | 34%   | 33%   | 34%               |  | 35%       | 34%     | 34%     | 36%   |
| Somewhat disagree | 15%     | 12%      | 15%   | 16%   | 13%               |  | 14%       | 18%     | 15%     | 12%   |
| Disagree          | 7%      | 4%       | 10%   | 6%    | 7%                |  | 8%        | 7%      | 6%      | 7%    |
| Strongly disagree | 5%      | 1%       | 6%    | 6%    | 5%                |  | 5%        | 4%      | 4%      | 6%    |
| Totals            | 102%    | 101%     | 100%  | 99%   | 100%              |  | 101%      | 100%    | 100%    | 100%  |
| Unweighted N      | (3,208) | (1,365)  | (648) | (842) | (2,355)           |  | (582)     | (602)   | (1,415) | (609) |

**10C. Rural Areas — Big cities are dirty and noisy places to live compared to other places**

Please indicate how strongly you agree or disagree with the following statements:

|                   | Total   | Gender  |         | Age   |       |         |       | Race    |         |          |
|-------------------|---------|---------|---------|-------|-------|---------|-------|---------|---------|----------|
|                   |         | Male    | Female  | 18-29 | 30-44 | 45-64   | 65+   | White   | Black   | Hispanic |
| Strongly agree    | 19%     | 22%     | 16%     | 16%   | 20%   | 22%     | 17%   | 21%     | 12%     | 16%      |
| Agree             | 24%     | 28%     | 20%     | 22%   | 23%   | 24%     | 27%   | 26%     | 20%     | 20%      |
| Somewhat agree    | 32%     | 28%     | 35%     | 33%   | 30%   | 32%     | 31%   | 30%     | 30%     | 39%      |
| Somewhat disagree | 14%     | 12%     | 16%     | 16%   | 15%   | 11%     | 14%   | 12%     | 20%     | 14%      |
| Disagree          | 8%      | 6%      | 9%      | 9%    | 6%    | 7%      | 8%    | 7%      | 11%     | 8%       |
| Strongly disagree | 4%      | 4%      | 5%      | 4%    | 6%    | 4%      | 3%    | 4%      | 6%      | 3%       |
| Totals            | 101%    | 100%    | 101%    | 100%  | 100%  | 100%    | 100%  | 100%    | 99%     | 100%     |
| Unweighted N      | (3,200) | (1,371) | (1,829) | (704) | (685) | (1,120) | (691) | (1,307) | (1,302) | (403)    |

|                   | Total   | Party ID |       |       | Registered Voters |  | Region    |         |         |       |
|-------------------|---------|----------|-------|-------|-------------------|--|-----------|---------|---------|-------|
|                   |         | Dem      | Rep   | Ind   | Voters            |  | Northeast | Midwest | South   | West  |
| Strongly agree    | 19%     | 10%      | 26%   | 23%   | 21%               |  | 19%       | 18%     | 21%     | 17%   |
| Agree             | 24%     | 19%      | 30%   | 26%   | 25%               |  | 24%       | 26%     | 23%     | 23%   |
| Somewhat agree    | 32%     | 35%      | 27%   | 29%   | 30%               |  | 33%       | 29%     | 30%     | 36%   |
| Somewhat disagree | 14%     | 19%      | 8%    | 13%   | 13%               |  | 13%       | 16%     | 14%     | 13%   |
| Disagree          | 8%      | 12%      | 5%    | 6%    | 8%                |  | 7%        | 9%      | 8%      | 6%    |
| Strongly disagree | 4%      | 6%       | 3%    | 4%    | 4%                |  | 5%        | 3%      | 4%      | 5%    |
| Totals            | 101%    | 101%     | 99%   | 101%  | 101%              |  | 101%      | 101%    | 100%    | 100%  |
| Unweighted N      | (3,200) | (1,364)  | (646) | (840) | (2,357)           |  | (580)     | (602)   | (1,413) | (605) |

**10D. Rural Areas — Rural areas are better places to raise children than other places**

Please indicate how strongly you agree or disagree with the following statements:

|                   | Total   | Gender  |         | Age   |       |         |       | Race    |         |          |
|-------------------|---------|---------|---------|-------|-------|---------|-------|---------|---------|----------|
|                   |         | Male    | Female  | 18-29 | 30-44 | 45-64   | 65+   | White   | Black   | Hispanic |
| Strongly agree    | 20%     | 21%     | 18%     | 15%   | 18%   | 21%     | 23%   | 23%     | 11%     | 12%      |
| Agree             | 21%     | 23%     | 20%     | 19%   | 19%   | 22%     | 24%   | 22%     | 19%     | 22%      |
| Somewhat agree    | 30%     | 30%     | 31%     | 33%   | 30%   | 30%     | 29%   | 28%     | 34%     | 37%      |
| Somewhat disagree | 19%     | 17%     | 20%     | 22%   | 20%   | 17%     | 17%   | 17%     | 20%     | 20%      |
| Disagree          | 6%      | 6%      | 7%      | 7%    | 8%    | 6%      | 5%    | 5%      | 10%     | 7%       |
| Strongly disagree | 4%      | 4%      | 4%      | 4%    | 5%    | 4%      | 2%    | 4%      | 6%      | 2%       |
| Totals            | 100%    | 101%    | 100%    | 100%  | 100%  | 100%    | 100%  | 99%     | 100%    | 100%     |
| Unweighted N      | (3,224) | (1,385) | (1,839) | (715) | (688) | (1,130) | (691) | (1,313) | (1,314) | (407)    |

|                   | Total   | Party ID |       |       | Registered Voters |  | Region    |         |         |       |
|-------------------|---------|----------|-------|-------|-------------------|--|-----------|---------|---------|-------|
|                   |         | Dem      | Rep   | Ind   | Voters            |  | Northeast | Midwest | South   | West  |
| Strongly agree    | 20%     | 10%      | 32%   | 20%   | 21%               |  | 20%       | 23%     | 20%     | 16%   |
| Agree             | 21%     | 14%      | 30%   | 21%   | 21%               |  | 19%       | 20%     | 21%     | 23%   |
| Somewhat agree    | 30%     | 32%      | 24%   | 32%   | 30%               |  | 32%       | 28%     | 31%     | 30%   |
| Somewhat disagree | 19%     | 28%      | 10%   | 16%   | 18%               |  | 19%       | 19%     | 18%     | 19%   |
| Disagree          | 6%      | 11%      | 3%    | 6%    | 6%                |  | 6%        | 6%      | 7%      | 7%    |
| Strongly disagree | 4%      | 5%       | 1%    | 5%    | 4%                |  | 4%        | 5%      | 3%      | 4%    |
| Totals            | 100%    | 100%     | 100%  | 100%  | 100%              |  | 100%      | 101%    | 100%    | 99%   |
| Unweighted N      | (3,224) | (1,374)  | (652) | (844) | (2,367)           |  | (586)     | (605)   | (1,418) | (615) |

**10E. Rural Areas — Big cities provide opportunities for new experiences that rural areas don't**

Please indicate how strongly you agree or disagree with the following statements:

|                   | Total   | Gender  |         | Age   |       |         |       | Race    |         |          |
|-------------------|---------|---------|---------|-------|-------|---------|-------|---------|---------|----------|
|                   |         | Male    | Female  | 18-29 | 30-44 | 45-64   | 65+   | White   | Black   | Hispanic |
| Strongly agree    | 17%     | 18%     | 17%     | 22%   | 20%   | 16%     | 12%   | 15%     | 23%     | 19%      |
| Agree             | 32%     | 31%     | 33%     | 32%   | 30%   | 34%     | 34%   | 34%     | 35%     | 28%      |
| Somewhat agree    | 33%     | 32%     | 33%     | 30%   | 29%   | 34%     | 37%   | 34%     | 27%     | 33%      |
| Somewhat disagree | 10%     | 10%     | 11%     | 9%    | 14%   | 9%      | 11%   | 9%      | 9%      | 13%      |
| Disagree          | 3%      | 4%      | 3%      | 4%    | 3%    | 3%      | 3%    | 3%      | 3%      | 4%       |
| Strongly disagree | 4%      | 5%      | 3%      | 3%    | 4%    | 5%      | 3%    | 4%      | 3%      | 3%       |
| Totals            | 99%     | 100%    | 100%    | 100%  | 100%  | 101%    | 100%  | 99%     | 100%    | 100%     |
| Unweighted N      | (3,214) | (1,379) | (1,835) | (706) | (685) | (1,135) | (688) | (1,310) | (1,310) | (404)    |

|                   | Total   | Party ID |       |       | Registered Voters |  | Region    |         |         |       |
|-------------------|---------|----------|-------|-------|-------------------|--|-----------|---------|---------|-------|
|                   |         | Dem      | Rep   | Ind   | Voters            |  | Northeast | Midwest | South   | West  |
| Strongly agree    | 17%     | 21%      | 12%   | 20%   | 19%               |  | 20%       | 18%     | 18%     | 14%   |
| Agree             | 32%     | 39%      | 31%   | 30%   | 34%               |  | 32%       | 34%     | 32%     | 31%   |
| Somewhat agree    | 33%     | 29%      | 37%   | 31%   | 31%               |  | 29%       | 33%     | 32%     | 36%   |
| Somewhat disagree | 10%     | 8%       | 11%   | 11%   | 9%                |  | 8%        | 9%      | 12%     | 12%   |
| Disagree          | 3%      | 2%       | 4%    | 4%    | 4%                |  | 5%        | 2%      | 3%      | 3%    |
| Strongly disagree | 4%      | 2%       | 4%    | 4%    | 4%                |  | 6%        | 3%      | 4%      | 3%    |
| Totals            | 99%     | 101%     | 99%   | 100%  | 101%              |  | 100%      | 99%     | 101%    | 99%   |
| Unweighted N      | (3,214) | (1,373)  | (646) | (846) | (2,370)           |  | (581)     | (603)   | (1,419) | (611) |

**10F. Rural Areas — People from big cities are unfriendly and aggressive compared to other areas**

Please indicate how strongly you agree or disagree with the following statements:

|                   | Total   | Gender  |         | Age   |       |         |       | Race    |         |          |
|-------------------|---------|---------|---------|-------|-------|---------|-------|---------|---------|----------|
|                   |         | Male    | Female  | 18-29 | 30-44 | 45-64   | 65+   | White   | Black   | Hispanic |
| Strongly agree    | 10%     | 12%     | 7%      | 9%    | 11%   | 10%     | 8%    | 10%     | 9%      | 9%       |
| Agree             | 17%     | 20%     | 15%     | 22%   | 17%   | 15%     | 16%   | 18%     | 15%     | 18%      |
| Somewhat agree    | 31%     | 31%     | 32%     | 31%   | 30%   | 30%     | 35%   | 31%     | 30%     | 33%      |
| Somewhat disagree | 22%     | 20%     | 23%     | 21%   | 20%   | 25%     | 20%   | 21%     | 25%     | 22%      |
| Disagree          | 13%     | 11%     | 15%     | 12%   | 14%   | 13%     | 14%   | 14%     | 13%     | 11%      |
| Strongly disagree | 7%      | 6%      | 8%      | 5%    | 8%    | 7%      | 8%    | 7%      | 9%      | 6%       |
| Totals            | 100%    | 100%    | 100%    | 100%  | 100%  | 100%    | 101%  | 101%    | 101%    | 99%      |
| Unweighted N      | (3,203) | (1,370) | (1,833) | (705) | (684) | (1,128) | (686) | (1,314) | (1,298) | (402)    |

|                   | Total   | Party ID |       |       | Registered Voters |  | Region    |         |         |       |
|-------------------|---------|----------|-------|-------|-------------------|--|-----------|---------|---------|-------|
|                   |         | Dem      | Rep   | Ind   | Voters            |  | Northeast | Midwest | South   | West  |
| Strongly agree    | 10%     | 6%       | 14%   | 10%   | 10%               |  | 9%        | 9%      | 11%     | 8%    |
| Agree             | 17%     | 12%      | 27%   | 16%   | 18%               |  | 15%       | 15%     | 18%     | 20%   |
| Somewhat agree    | 31%     | 27%      | 31%   | 35%   | 30%               |  | 29%       | 31%     | 32%     | 31%   |
| Somewhat disagree | 22%     | 26%      | 14%   | 22%   | 21%               |  | 25%       | 21%     | 21%     | 21%   |
| Disagree          | 13%     | 18%      | 10%   | 10%   | 14%               |  | 14%       | 15%     | 12%     | 13%   |
| Strongly disagree | 7%      | 11%      | 4%    | 6%    | 8%                |  | 8%        | 9%      | 6%      | 6%    |
| Totals            | 100%    | 100%     | 100%  | 99%   | 101%              |  | 100%      | 100%    | 100%    | 99%   |
| Unweighted N      | (3,203) | (1,365)  | (649) | (843) | (2,352)           |  | (578)     | (602)   | (1,411) | (612) |

**TASS - Wave 1 - October 2023**  
**October 16 - 24, 2023 - 3281 U.S. Adults**

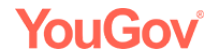

**10G. Rural Areas — Rural people are crude and uncultured compared with people living elsewhere**

Please indicate how strongly you agree or disagree with the following statements:

|                   | Total   | Gender  |         | Age   |       |         |       | Race    |         |          |
|-------------------|---------|---------|---------|-------|-------|---------|-------|---------|---------|----------|
|                   |         | Male    | Female  | 18-29 | 30-44 | 45-64   | 65+   | White   | Black   | Hispanic |
| Strongly agree    | 3%      | 4%      | 3%      | 7%    | 4%    | 2%      | 0%    | 2%      | 6%      | 5%       |
| Agree             | 8%      | 8%      | 8%      | 17%   | 9%    | 4%      | 3%    | 6%      | 11%     | 12%      |
| Somewhat agree    | 15%     | 16%     | 14%     | 24%   | 17%   | 12%     | 8%    | 12%     | 19%     | 22%      |
| Somewhat disagree | 22%     | 21%     | 22%     | 20%   | 24%   | 24%     | 16%   | 19%     | 26%     | 25%      |
| Disagree          | 25%     | 25%     | 24%     | 19%   | 23%   | 26%     | 32%   | 28%     | 23%     | 16%      |
| Strongly disagree | 28%     | 26%     | 29%     | 13%   | 22%   | 33%     | 41%   | 33%     | 15%     | 19%      |
| Totals            | 101%    | 100%    | 100%    | 100%  | 99%   | 101%    | 100%  | 100%    | 100%    | 99%      |
| Unweighted N      | (3,202) | (1,367) | (1,835) | (702) | (683) | (1,129) | (688) | (1,311) | (1,299) | (404)    |

|                   | Total   | Party ID |       |       | Registered Voters |  | Region    |         |         |       |
|-------------------|---------|----------|-------|-------|-------------------|--|-----------|---------|---------|-------|
|                   |         | Dem      | Rep   | Ind   | Voters            |  | Northeast | Midwest | South   | West  |
| Strongly agree    | 3%      | 4%       | 4%    | 2%    | 3%                |  | 3%        | 2%      | 4%      | 2%    |
| Agree             | 8%      | 8%       | 8%    | 7%    | 8%                |  | 9%        | 6%      | 7%      | 9%    |
| Somewhat agree    | 15%     | 21%      | 9%    | 13%   | 12%               |  | 17%       | 12%     | 17%     | 14%   |
| Somewhat disagree | 22%     | 23%      | 16%   | 22%   | 20%               |  | 21%       | 20%     | 21%     | 25%   |
| Disagree          | 25%     | 27%      | 23%   | 25%   | 26%               |  | 24%       | 29%     | 23%     | 24%   |
| Strongly disagree | 28%     | 17%      | 40%   | 30%   | 31%               |  | 26%       | 30%     | 28%     | 25%   |
| Totals            | 101%    | 100%     | 100%  | 99%   | 100%              |  | 100%      | 99%     | 100%    | 99%   |
| Unweighted N      | (3,202) | (1,356)  | (645) | (847) | (2,351)           |  | (585)     | (602)   | (1,410) | (605) |

**10H. Rural Areas — People living in big cities have stressful lives compared to those living elsewhere**

Please indicate how strongly you agree or disagree with the following statements:

|                   | Total   | Gender  |         | Age   |       |         |       | Race    |         |          |
|-------------------|---------|---------|---------|-------|-------|---------|-------|---------|---------|----------|
|                   |         | Male    | Female  | 18-29 | 30-44 | 45-64   | 65+   | White   | Black   | Hispanic |
| Strongly agree    | 14%     | 16%     | 13%     | 15%   | 13%   | 16%     | 14%   | 14%     | 14%     | 17%      |
| Agree             | 24%     | 28%     | 21%     | 22%   | 23%   | 25%     | 27%   | 26%     | 23%     | 19%      |
| Somewhat agree    | 32%     | 31%     | 33%     | 31%   | 32%   | 33%     | 33%   | 31%     | 33%     | 39%      |
| Somewhat disagree | 17%     | 14%     | 19%     | 21%   | 18%   | 15%     | 15%   | 17%     | 17%     | 16%      |
| Disagree          | 8%      | 7%      | 9%      | 8%    | 9%    | 7%      | 9%    | 9%      | 8%      | 6%       |
| Strongly disagree | 4%      | 4%      | 4%      | 4%    | 6%    | 4%      | 2%    | 4%      | 5%      | 3%       |
| Totals            | 99%     | 100%    | 99%     | 101%  | 101%  | 100%    | 100%  | 101%    | 100%    | 100%     |
| Unweighted N      | (3,209) | (1,378) | (1,831) | (708) | (683) | (1,128) | (690) | (1,310) | (1,301) | (408)    |

|                   | Total   | Party ID |       |       | Registered Voters |  | Region    |         |         |       |
|-------------------|---------|----------|-------|-------|-------------------|--|-----------|---------|---------|-------|
|                   |         | Dem      | Rep   | Ind   | Voters            |  | Northeast | Midwest | South   | West  |
| Strongly agree    | 14%     | 11%      | 20%   | 13%   | 15%               |  | 15%       | 12%     | 15%     | 15%   |
| Agree             | 24%     | 20%      | 30%   | 27%   | 24%               |  | 22%       | 25%     | 25%     | 25%   |
| Somewhat agree    | 32%     | 34%      | 29%   | 31%   | 32%               |  | 32%       | 30%     | 33%     | 33%   |
| Somewhat disagree | 17%     | 22%      | 12%   | 16%   | 16%               |  | 17%       | 20%     | 17%     | 14%   |
| Disagree          | 8%      | 10%      | 7%    | 7%    | 9%                |  | 10%       | 9%      | 7%      | 7%    |
| Strongly disagree | 4%      | 3%       | 3%    | 6%    | 4%                |  | 3%        | 4%      | 4%      | 5%    |
| Totals            | 99%     | 100%     | 101%  | 100%  | 100%              |  | 99%       | 100%    | 101%    | 99%   |
| Unweighted N      | (3,209) | (1,361)  | (651) | (843) | (2,355)           |  | (584)     | (603)   | (1,414) | (608) |

**10I. Rural Areas — People from small towns are suspicious and closed minded compared to people elsewhere**

Please indicate how strongly you agree or disagree with the following statements:

|                   | Total   | Gender  |         | Age   |       |         |       | Race    |         |          |
|-------------------|---------|---------|---------|-------|-------|---------|-------|---------|---------|----------|
|                   |         | Male    | Female  | 18-29 | 30-44 | 45-64   | 65+   | White   | Black   | Hispanic |
| Strongly agree    | 5%      | 6%      | 4%      | 8%    | 7%    | 4%      | 2%    | 4%      | 11%     | 8%       |
| Agree             | 10%     | 10%     | 11%     | 16%   | 12%   | 9%      | 6%    | 9%      | 15%     | 14%      |
| Somewhat agree    | 26%     | 27%     | 24%     | 34%   | 26%   | 24%     | 20%   | 23%     | 29%     | 32%      |
| Somewhat disagree | 22%     | 21%     | 23%     | 21%   | 23%   | 22%     | 23%   | 21%     | 23%     | 24%      |
| Disagree          | 21%     | 20%     | 21%     | 14%   | 17%   | 22%     | 29%   | 24%     | 13%     | 14%      |
| Strongly disagree | 16%     | 15%     | 16%     | 7%    | 15%   | 19%     | 21%   | 20%     | 9%      | 9%       |
| Totals            | 100%    | 99%     | 99%     | 100%  | 100%  | 100%    | 101%  | 101%    | 100%    | 101%     |
| Unweighted N      | (3,211) | (1,374) | (1,837) | (714) | (679) | (1,130) | (688) | (1,310) | (1,303) | (408)    |

|                   | Total   | Party ID |       |       | Registered Voters |  | Region    |         |         |       |
|-------------------|---------|----------|-------|-------|-------------------|--|-----------|---------|---------|-------|
|                   |         | Dem      | Rep   | Ind   | Voters            |  | Northeast | Midwest | South   | West  |
| Strongly agree    | 5%      | 6%       | 5%    | 4%    | 5%                |  | 5%        | 5%      | 5%      | 5%    |
| Agree             | 10%     | 12%      | 10%   | 10%   | 11%               |  | 9%        | 9%      | 11%     | 11%   |
| Somewhat agree    | 26%     | 34%      | 15%   | 25%   | 24%               |  | 27%       | 25%     | 25%     | 27%   |
| Somewhat disagree | 22%     | 23%      | 21%   | 23%   | 21%               |  | 25%       | 25%     | 21%     | 20%   |
| Disagree          | 21%     | 18%      | 25%   | 20%   | 22%               |  | 21%       | 19%     | 21%     | 22%   |
| Strongly disagree | 16%     | 7%       | 24%   | 19%   | 17%               |  | 14%       | 17%     | 16%     | 15%   |
| Totals            | 100%    | 100%     | 100%  | 101%  | 100%              |  | 101%      | 100%    | 99%     | 100%  |
| Unweighted N      | (3,211) | (1,369)  | (645) | (845) | (2,357)           |  | (580)     | (608)   | (1,415) | (608) |



**TASS - Wave 1 - October 2023**  
**October 16 - 24, 2023 - 3281 U.S. Adults**

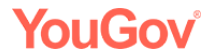

**11A. Qualities of Residence — Job opportunities**

How would you rate each of the following in the place where you live now?

|              | Total   | Gender  |         | Age   |       |         |       | Race    |         |          |
|--------------|---------|---------|---------|-------|-------|---------|-------|---------|---------|----------|
|              |         | Male    | Female  | 18-29 | 30-44 | 45-64   | 65+   | White   | Black   | Hispanic |
| Excellent    | 13%     | 15%     | 11%     | 18%   | 16%   | 10%     | 10%   | 12%     | 15%     | 17%      |
| Good         | 43%     | 43%     | 43%     | 40%   | 39%   | 42%     | 52%   | 45%     | 40%     | 40%      |
| Only Fair    | 30%     | 29%     | 31%     | 28%   | 30%   | 34%     | 29%   | 30%     | 32%     | 31%      |
| Poor         | 13%     | 13%     | 14%     | 14%   | 16%   | 14%     | 9%    | 14%     | 13%     | 12%      |
| Totals       | 99%     | 100%    | 99%     | 100%  | 101%  | 100%    | 100%  | 101%    | 100%    | 100%     |
| Unweighted N | (3,267) | (1,401) | (1,866) | (731) | (696) | (1,147) | (693) | (1,324) | (1,342) | (411)    |

  

|              | Total   | Party ID |       |       | Registered Voters<br>Voters | Region    |         |         |       |
|--------------|---------|----------|-------|-------|-----------------------------|-----------|---------|---------|-------|
|              |         | Dem      | Rep   | Ind   |                             | Northeast | Midwest | South   | West  |
| Excellent    | 13%     | 15%      | 14%   | 11%   | 14%                         | 12%       | 10%     | 14%     | 15%   |
| Good         | 43%     | 45%      | 48%   | 38%   | 43%                         | 45%       | 44%     | 42%     | 43%   |
| Only Fair    | 30%     | 29%      | 27%   | 34%   | 29%                         | 28%       | 33%     | 30%     | 32%   |
| Poor         | 13%     | 11%      | 11%   | 16%   | 13%                         | 15%       | 14%     | 14%     | 11%   |
| Totals       | 99%     | 100%     | 100%  | 99%   | 99%                         | 100%      | 101%    | 100%    | 101%  |
| Unweighted N | (3,267) | (1,388)  | (658) | (856) | (2,401)                     | (587)     | (616)   | (1,444) | (620) |

**TASS - Wave 1 - October 2023**  
**October 16 - 24, 2023 - 3281 U.S. Adults**

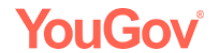

**11B. Qualities of Residence — Cost of housing and living expenses**

How would you rate each of the following in the place where you live now?

|              | Total   | Gender  |         | Age   |       |         |       | Race    |         |          |
|--------------|---------|---------|---------|-------|-------|---------|-------|---------|---------|----------|
|              |         | Male    | Female  | 18-29 | 30-44 | 45-64   | 65+   | White   | Black   | Hispanic |
| Excellent    | 9%      | 10%     | 8%      | 14%   | 9%    | 7%      | 6%    | 8%      | 11%     | 11%      |
| Good         | 30%     | 33%     | 28%     | 33%   | 28%   | 28%     | 35%   | 32%     | 33%     | 24%      |
| Only Fair    | 35%     | 35%     | 35%     | 36%   | 35%   | 36%     | 35%   | 36%     | 31%     | 37%      |
| Poor         | 26%     | 22%     | 29%     | 18%   | 28%   | 29%     | 24%   | 24%     | 26%     | 28%      |
| Totals       | 100%    | 100%    | 100%    | 101%  | 100%  | 100%    | 100%  | 100%    | 101%    | 100%     |
| Unweighted N | (3,260) | (1,395) | (1,865) | (728) | (696) | (1,146) | (690) | (1,320) | (1,342) | (409)    |

  

|              | Total   | Party ID |       |       | Registered Voters<br>Voters | Region    |         |         |       |
|--------------|---------|----------|-------|-------|-----------------------------|-----------|---------|---------|-------|
|              |         | Dem      | Rep   | Ind   |                             | Northeast | Midwest | South   | West  |
| Excellent    | 9%      | 10%      | 10%   | 6%    | 9%                          | 7%        | 7%      | 12%     | 6%    |
| Good         | 30%     | 29%      | 32%   | 33%   | 32%                         | 34%       | 34%     | 32%     | 21%   |
| Only Fair    | 35%     | 35%      | 36%   | 34%   | 33%                         | 36%       | 38%     | 34%     | 35%   |
| Poor         | 26%     | 25%      | 22%   | 26%   | 25%                         | 22%       | 20%     | 22%     | 39%   |
| Totals       | 100%    | 99%      | 100%  | 99%   | 99%                         | 99%       | 99%     | 100%    | 101%  |
| Unweighted N | (3,260) | (1,386)  | (655) | (856) | (2,395)                     | (588)     | (614)   | (1,441) | (617) |

**TASS - Wave 1 - October 2023**  
**October 16 - 24, 2023 - 3281 U.S. Adults**



**11C. Qualities of Residence — As a place to raise children**

How would you rate each of the following in the place where you live now?

|              | Total   | Gender  |         | Age   |       |         |       | Race    |         |          |
|--------------|---------|---------|---------|-------|-------|---------|-------|---------|---------|----------|
|              |         | Male    | Female  | 18-29 | 30-44 | 45-64   | 65+   | White   | Black   | Hispanic |
| Excellent    | 21%     | 21%     | 21%     | 23%   | 21%   | 20%     | 21%   | 23%     | 18%     | 16%      |
| Good         | 46%     | 49%     | 44%     | 46%   | 41%   | 47%     | 52%   | 48%     | 42%     | 45%      |
| Only Fair    | 23%     | 22%     | 24%     | 21%   | 28%   | 24%     | 20%   | 21%     | 28%     | 27%      |
| Poor         | 10%     | 8%      | 11%     | 10%   | 11%   | 10%     | 8%    | 8%      | 11%     | 11%      |
| Totals       | 100%    | 100%    | 100%    | 100%  | 101%  | 101%    | 101%  | 100%    | 99%     | 99%      |
| Unweighted N | (3,265) | (1,398) | (1,867) | (731) | (696) | (1,145) | (693) | (1,319) | (1,345) | (411)    |

  

|              | Total   | Party ID |       |       | Registered Voters<br>Voters | Region    |         |         |       |
|--------------|---------|----------|-------|-------|-----------------------------|-----------|---------|---------|-------|
|              |         | Dem      | Rep   | Ind   |                             | Northeast | Midwest | South   | West  |
| Excellent    | 21%     | 19%      | 28%   | 17%   | 23%                         | 23%       | 22%     | 22%     | 17%   |
| Good         | 46%     | 50%      | 47%   | 45%   | 47%                         | 47%       | 50%     | 45%     | 44%   |
| Only Fair    | 23%     | 22%      | 18%   | 27%   | 21%                         | 20%       | 21%     | 24%     | 26%   |
| Poor         | 10%     | 9%       | 7%    | 11%   | 8%                          | 10%       | 7%      | 9%      | 13%   |
| Totals       | 100%    | 100%     | 100%  | 100%  | 99%                         | 100%      | 100%    | 100%    | 100%  |
| Unweighted N | (3,265) | (1,390)  | (658) | (853) | (2,400)                     | (588)     | (613)   | (1,445) | (619) |

**TASS - Wave 1 - October 2023**  
**October 16 - 24, 2023 - 3281 U.S. Adults**



**11D. Qualities of Residence — Low crime and safety**

How would you rate each of the following in the place where you live now?

|              | Total   | Gender  |         | Age   |       |         |       | Race    |         |          |
|--------------|---------|---------|---------|-------|-------|---------|-------|---------|---------|----------|
|              |         | Male    | Female  | 18-29 | 30-44 | 45-64   | 65+   | White   | Black   | Hispanic |
| Excellent    | 17%     | 19%     | 15%     | 23%   | 17%   | 14%     | 16%   | 18%     | 13%     | 17%      |
| Good         | 43%     | 46%     | 41%     | 38%   | 40%   | 45%     | 50%   | 47%     | 35%     | 37%      |
| Only Fair    | 25%     | 22%     | 27%     | 24%   | 25%   | 25%     | 25%   | 24%     | 29%     | 27%      |
| Poor         | 15%     | 13%     | 17%     | 16%   | 18%   | 15%     | 9%    | 12%     | 23%     | 20%      |
| Totals       | 100%    | 100%    | 100%    | 101%  | 100%  | 99%     | 100%  | 101%    | 100%    | 101%     |
| Unweighted N | (3,261) | (1,395) | (1,866) | (730) | (694) | (1,147) | (690) | (1,319) | (1,343) | (409)    |

  

|              | Total   | Party ID |       |       | Registered Voters |  | Region    |         |         |       |
|--------------|---------|----------|-------|-------|-------------------|--|-----------|---------|---------|-------|
|              |         | Dem      | Rep   | Ind   | Voters            |  | Northeast | Midwest | South   | West  |
| Excellent    | 17%     | 16%      | 21%   | 15%   | 18%               |  | 21%       | 17%     | 16%     | 16%   |
| Good         | 43%     | 44%      | 43%   | 45%   | 44%               |  | 44%       | 46%     | 43%     | 41%   |
| Only Fair    | 25%     | 26%      | 24%   | 23%   | 23%               |  | 21%       | 23%     | 26%     | 27%   |
| Poor         | 15%     | 13%      | 12%   | 16%   | 14%               |  | 13%       | 15%     | 14%     | 17%   |
| Totals       | 100%    | 99%      | 100%  | 99%   | 99%               |  | 99%       | 101%    | 99%     | 101%  |
| Unweighted N | (3,261) | (1,387)  | (657) | (852) | (2,397)           |  | (588)     | (614)   | (1,440) | (619) |

**11E. Qualities of Residence — Quality of public schools**

How would you rate each of the following in the place where you live now?

|              | Total   | Gender  |         | Age   |       |         |       | Race    |         |          |
|--------------|---------|---------|---------|-------|-------|---------|-------|---------|---------|----------|
|              |         | Male    | Female  | 18-29 | 30-44 | 45-64   | 65+   | White   | Black   | Hispanic |
| Excellent    | 15%     | 16%     | 15%     | 18%   | 17%   | 11%     | 16%   | 15%     | 18%     | 14%      |
| Good         | 46%     | 47%     | 45%     | 46%   | 44%   | 45%     | 49%   | 46%     | 42%     | 48%      |
| Only Fair    | 26%     | 27%     | 25%     | 24%   | 26%   | 29%     | 22%   | 26%     | 29%     | 27%      |
| Poor         | 13%     | 11%     | 15%     | 12%   | 13%   | 14%     | 12%   | 13%     | 12%     | 11%      |
| Totals       | 100%    | 101%    | 100%    | 100%  | 100%  | 99%     | 99%   | 100%    | 101%    | 100%     |
| Unweighted N | (3,266) | (1,397) | (1,869) | (731) | (696) | (1,145) | (694) | (1,323) | (1,343) | (410)    |

  

|              | Total   | Party ID |       |       | Registered Voters<br>Voters | Region    |         |         |       |
|--------------|---------|----------|-------|-------|-----------------------------|-----------|---------|---------|-------|
|              |         | Dem      | Rep   | Ind   |                             | Northeast | Midwest | South   | West  |
| Excellent    | 15%     | 18%      | 18%   | 12%   | 18%                         | 22%       | 11%     | 16%     | 13%   |
| Good         | 46%     | 46%      | 49%   | 44%   | 45%                         | 43%       | 50%     | 46%     | 43%   |
| Only Fair    | 26%     | 25%      | 22%   | 28%   | 25%                         | 24%       | 25%     | 25%     | 30%   |
| Poor         | 13%     | 10%      | 11%   | 16%   | 13%                         | 11%       | 13%     | 13%     | 13%   |
| Totals       | 100%    | 99%      | 100%  | 100%  | 101%                        | 100%      | 99%     | 100%    | 99%   |
| Unweighted N | (3,266) | (1,390)  | (658) | (854) | (2,402)                     | (590)     | (617)   | (1,442) | (617) |

**11F. Qualities of Residence — As a place where people look out for each other**

How would you rate each of the following in the place where you live now?

|              | Total   | Gender  |         | Age   |       |         |       | Race    |         |          |
|--------------|---------|---------|---------|-------|-------|---------|-------|---------|---------|----------|
|              |         | Male    | Female  | 18-29 | 30-44 | 45-64   | 65+   | White   | Black   | Hispanic |
| Excellent    | 15%     | 15%     | 15%     | 21%   | 15%   | 11%     | 14%   | 15%     | 16%     | 15%      |
| Good         | 43%     | 46%     | 40%     | 40%   | 38%   | 42%     | 53%   | 47%     | 36%     | 37%      |
| Only Fair    | 30%     | 29%     | 31%     | 25%   | 31%   | 35%     | 28%   | 28%     | 33%     | 34%      |
| Poor         | 12%     | 10%     | 14%     | 13%   | 17%   | 12%     | 5%    | 10%     | 15%     | 15%      |
| Totals       | 100%    | 100%    | 100%    | 99%   | 101%  | 100%    | 100%  | 100%    | 100%    | 101%     |
| Unweighted N | (3,260) | (1,396) | (1,864) | (726) | (695) | (1,145) | (694) | (1,319) | (1,342) | (409)    |

  

|              | Total   | Party ID |       |       | Registered Voters<br>Voters | Region    |         |         |       |
|--------------|---------|----------|-------|-------|-----------------------------|-----------|---------|---------|-------|
|              |         | Dem      | Rep   | Ind   |                             | Northeast | Midwest | South   | West  |
| Excellent    | 15%     | 15%      | 21%   | 11%   | 16%                         | 16%       | 14%     | 17%     | 12%   |
| Good         | 43%     | 44%      | 46%   | 43%   | 45%                         | 45%       | 44%     | 44%     | 40%   |
| Only Fair    | 30%     | 32%      | 25%   | 33%   | 29%                         | 29%       | 29%     | 29%     | 34%   |
| Poor         | 12%     | 10%      | 9%    | 13%   | 10%                         | 10%       | 13%     | 10%     | 14%   |
| Totals       | 100%    | 101%     | 101%  | 100%  | 100%                        | 100%      | 100%    | 100%    | 100%  |
| Unweighted N | (3,260) | (1,388)  | (658) | (852) | (2,397)                     | (590)     | (612)   | (1,439) | (619) |

**TASS - Wave 1 - October 2023**  
**October 16 - 24, 2023 - 3281 U.S. Adults**



**12A. Race and Racism — I am angry that racism exists**

Do you agree or disagree with the following statements?

|                   | Total   | Gender  |         | Age   |       |         |       | Race    |         |          |
|-------------------|---------|---------|---------|-------|-------|---------|-------|---------|---------|----------|
|                   |         | Male    | Female  | 18-29 | 30-44 | 45-64   | 65+   | White   | Black   | Hispanic |
| Strongly agree    | 39%     | 35%     | 43%     | 38%   | 39%   | 39%     | 39%   | 35%     | 52%     | 41%      |
| Agree             | 29%     | 28%     | 30%     | 32%   | 26%   | 29%     | 30%   | 30%     | 25%     | 28%      |
| Somewhat agree    | 19%     | 20%     | 18%     | 18%   | 20%   | 18%     | 20%   | 19%     | 14%     | 21%      |
| Somewhat disagree | 7%      | 9%      | 5%      | 6%    | 8%    | 7%      | 7%    | 8%      | 4%      | 4%       |
| Disagree          | 3%      | 4%      | 2%      | 3%    | 3%    | 3%      | 3%    | 3%      | 3%      | 3%       |
| Strongly disagree | 3%      | 5%      | 2%      | 3%    | 4%    | 4%      | 2%    | 4%      | 2%      | 2%       |
| Totals            | 100%    | 101%    | 100%    | 100%  | 100%  | 100%    | 101%  | 99%     | 100%    | 99%      |
| Unweighted N      | (3,264) | (1,399) | (1,865) | (731) | (695) | (1,147) | (691) | (1,319) | (1,344) | (410)    |

|                   | Total   | Party ID |       |       | Registered Voters |  | Region    |         |         |       |
|-------------------|---------|----------|-------|-------|-------------------|--|-----------|---------|---------|-------|
|                   |         | Dem      | Rep   | Ind   | Voters            |  | Northeast | Midwest | South   | West  |
| Strongly agree    | 39%     | 50%      | 30%   | 36%   | 41%               |  | 37%       | 38%     | 38%     | 42%   |
| Agree             | 29%     | 30%      | 30%   | 28%   | 28%               |  | 29%       | 30%     | 29%     | 27%   |
| Somewhat agree    | 19%     | 15%      | 22%   | 21%   | 18%               |  | 21%       | 17%     | 19%     | 18%   |
| Somewhat disagree | 7%      | 3%       | 9%    | 8%    | 6%                |  | 7%        | 9%      | 6%      | 7%    |
| Disagree          | 3%      | 1%       | 4%    | 4%    | 3%                |  | 3%        | 2%      | 5%      | 1%    |
| Strongly disagree | 3%      | 1%       | 5%    | 4%    | 4%                |  | 4%        | 3%      | 2%      | 5%    |
| Totals            | 100%    | 100%     | 100%  | 101%  | 100%              |  | 101%      | 99%     | 99%     | 100%  |
| Unweighted N      | (3,264) | (1,391)  | (658) | (851) | (2,400)           |  | (590)     | (617)   | (1,441) | (616) |

**TASS - Wave 1 - October 2023**  
**October 16 - 24, 2023 - 3281 U.S. Adults**



**12B. Race and Racism — White people in the U.S. have certain advantages because of the color of their skin**

Do you agree or disagree with the following statements?

|                   | Total   | Gender  |         | Age   |       |         |       | Race    |         |          |
|-------------------|---------|---------|---------|-------|-------|---------|-------|---------|---------|----------|
|                   |         | Male    | Female  | 18-29 | 30-44 | 45-64   | 65+   | White   | Black   | Hispanic |
| Strongly agree    | 22%     | 19%     | 24%     | 22%   | 25%   | 19%     | 21%   | 16%     | 42%     | 24%      |
| Agree             | 22%     | 23%     | 21%     | 30%   | 20%   | 19%     | 20%   | 20%     | 27%     | 23%      |
| Somewhat agree    | 19%     | 18%     | 20%     | 22%   | 17%   | 18%     | 18%   | 17%     | 20%     | 25%      |
| Somewhat disagree | 12%     | 12%     | 11%     | 11%   | 12%   | 12%     | 11%   | 14%     | 5%      | 11%      |
| Disagree          | 12%     | 14%     | 10%     | 7%    | 11%   | 14%     | 13%   | 14%     | 3%      | 9%       |
| Strongly disagree | 14%     | 15%     | 13%     | 6%    | 15%   | 18%     | 16%   | 19%     | 3%      | 8%       |
| Totals            | 101%    | 101%    | 99%     | 98%   | 100%  | 100%    | 99%   | 100%    | 100%    | 100%     |
| Unweighted N      | (3,263) | (1,399) | (1,864) | (731) | (694) | (1,143) | (695) | (1,318) | (1,343) | (411)    |

|                   | Total   | Party ID |       |       | Registered Voters |  | Region    |         |         |       |
|-------------------|---------|----------|-------|-------|-------------------|--|-----------|---------|---------|-------|
|                   |         | Dem      | Rep   | Ind   | Voters            |  | Northeast | Midwest | South   | West  |
| Strongly agree    | 22%     | 37%      | 9%    | 17%   | 24%               |  | 21%       | 21%     | 20%     | 25%   |
| Agree             | 22%     | 29%      | 15%   | 21%   | 22%               |  | 21%       | 23%     | 21%     | 23%   |
| Somewhat agree    | 19%     | 20%      | 15%   | 18%   | 17%               |  | 18%       | 20%     | 20%     | 17%   |
| Somewhat disagree | 12%     | 8%       | 16%   | 11%   | 10%               |  | 14%       | 14%     | 10%     | 11%   |
| Disagree          | 12%     | 4%       | 17%   | 16%   | 11%               |  | 15%       | 8%      | 13%     | 11%   |
| Strongly disagree | 14%     | 3%       | 27%   | 16%   | 16%               |  | 11%       | 14%     | 17%     | 13%   |
| Totals            | 101%    | 101%     | 99%   | 99%   | 100%              |  | 100%      | 100%    | 101%    | 100%  |
| Unweighted N      | (3,263) | (1,390)  | (659) | (850) | (2,399)           |  | (590)     | (615)   | (1,441) | (617) |



**TASS - Wave 1 - October 2023**  
**October 16 - 24, 2023 - 3281 U.S. Adults**



**12C. Race and Racism — I often find myself fearful of people of other races**

Do you agree or disagree with the following statements?

|                   | Total   | Gender  |         | Age   |       |         |       | Race    |         |          |
|-------------------|---------|---------|---------|-------|-------|---------|-------|---------|---------|----------|
|                   |         | Male    | Female  | 18-29 | 30-44 | 45-64   | 65+   | White   | Black   | Hispanic |
| Strongly agree    | 4%      | 4%      | 3%      | 6%    | 5%    | 3%      | 1%    | 3%      | 7%      | 5%       |
| Agree             | 6%      | 6%      | 7%      | 15%   | 4%    | 5%      | 2%    | 5%      | 12%     | 8%       |
| Somewhat agree    | 15%     | 15%     | 15%     | 21%   | 14%   | 14%     | 14%   | 14%     | 16%     | 19%      |
| Somewhat disagree | 19%     | 20%     | 18%     | 17%   | 18%   | 20%     | 21%   | 19%     | 17%     | 18%      |
| Disagree          | 28%     | 28%     | 28%     | 22%   | 26%   | 27%     | 38%   | 30%     | 23%     | 26%      |
| Strongly disagree | 28%     | 26%     | 29%     | 18%   | 33%   | 32%     | 24%   | 29%     | 26%     | 24%      |
| Totals            | 100%    | 99%     | 100%    | 99%   | 100%  | 101%    | 100%  | 100%    | 101%    | 100%     |
| Unweighted N      | (3,269) | (1,402) | (1,867) | (731) | (696) | (1,149) | (693) | (1,323) | (1,345) | (410)    |

|                   | Total   | Party ID |       |       | Registered Voters |  | Region    |         |         |       |
|-------------------|---------|----------|-------|-------|-------------------|--|-----------|---------|---------|-------|
|                   |         | Dem      | Rep   | Ind   | Voters            |  | Northeast | Midwest | South   | West  |
| Strongly agree    | 4%      | 4%       | 3%    | 3%    | 4%                |  | 5%        | 4%      | 3%      | 3%    |
| Agree             | 6%      | 7%       | 7%    | 5%    | 6%                |  | 6%        | 5%      | 7%      | 6%    |
| Somewhat agree    | 15%     | 14%      | 21%   | 11%   | 14%               |  | 15%       | 16%     | 14%     | 16%   |
| Somewhat disagree | 19%     | 20%      | 16%   | 21%   | 18%               |  | 20%       | 19%     | 20%     | 17%   |
| Disagree          | 28%     | 30%      | 26%   | 28%   | 28%               |  | 26%       | 31%     | 28%     | 27%   |
| Strongly disagree | 28%     | 25%      | 27%   | 32%   | 30%               |  | 27%       | 26%     | 27%     | 31%   |
| Totals            | 100%    | 100%     | 100%  | 100%  | 100%              |  | 99%       | 101%    | 99%     | 100%  |
| Unweighted N      | (3,269) | (1,392)  | (658) | (855) | (2,403)           |  | (591)     | (618)   | (1,443) | (617) |

**12D. Race and Racism — Racial problems in the U.S. are rare, isolated situations**

Do you agree or disagree with the following statements?

|                   | Total   | Gender  |         | Age   |       |         |       | Race    |         |          |
|-------------------|---------|---------|---------|-------|-------|---------|-------|---------|---------|----------|
|                   |         | Male    | Female  | 18-29 | 30-44 | 45-64   | 65+   | White   | Black   | Hispanic |
| Strongly agree    | 8%      | 8%      | 8%      | 8%    | 10%   | 7%      | 7%    | 8%      | 8%      | 9%       |
| Agree             | 11%     | 14%     | 8%      | 15%   | 12%   | 10%     | 7%    | 12%     | 10%     | 9%       |
| Somewhat agree    | 18%     | 22%     | 14%     | 22%   | 20%   | 15%     | 16%   | 18%     | 14%     | 20%      |
| Somewhat disagree | 20%     | 20%     | 20%     | 22%   | 21%   | 19%     | 19%   | 21%     | 13%     | 22%      |
| Disagree          | 19%     | 16%     | 21%     | 18%   | 15%   | 21%     | 20%   | 19%     | 19%     | 18%      |
| Strongly disagree | 24%     | 20%     | 28%     | 14%   | 21%   | 28%     | 32%   | 22%     | 36%     | 23%      |
| Totals            | 100%    | 100%    | 99%     | 99%   | 99%   | 100%    | 101%  | 100%    | 100%    | 101%     |
| Unweighted N      | (3,271) | (1,401) | (1,870) | (731) | (698) | (1,148) | (694) | (1,323) | (1,346) | (411)    |

|                   | Total   | Party ID |       |       | Registered Voters |  | Region    |         |         |       |
|-------------------|---------|----------|-------|-------|-------------------|--|-----------|---------|---------|-------|
|                   |         | Dem      | Rep   | Ind   | Voters            |  | Northeast | Midwest | South   | West  |
| Strongly agree    | 8%      | 4%       | 11%   | 8%    | 9%                |  | 9%        | 5%      | 9%      | 8%    |
| Agree             | 11%     | 7%       | 15%   | 11%   | 12%               |  | 11%       | 7%      | 13%     | 11%   |
| Somewhat agree    | 18%     | 11%      | 25%   | 19%   | 16%               |  | 18%       | 21%     | 18%     | 16%   |
| Somewhat disagree | 20%     | 19%      | 22%   | 19%   | 18%               |  | 15%       | 22%     | 22%     | 19%   |
| Disagree          | 19%     | 22%      | 13%   | 20%   | 19%               |  | 22%       | 20%     | 17%     | 17%   |
| Strongly disagree | 24%     | 37%      | 13%   | 22%   | 26%               |  | 25%       | 25%     | 21%     | 29%   |
| Totals            | 100%    | 100%     | 99%   | 99%   | 100%              |  | 100%      | 100%    | 100%    | 100%  |
| Unweighted N      | (3,271) | (1,393)  | (658) | (855) | (2,404)           |  | (592)     | (618)   | (1,443) | (618) |

**13. Voted in Presidential Primary Election**

Have you voted in a recent presidential primary election or presidential caucus? Select all that apply.

|                  | Total   | Gender  |         | Age   |       |         |       | Race    |         |          |
|------------------|---------|---------|---------|-------|-------|---------|-------|---------|---------|----------|
|                  |         | Male    | Female  | 18-29 | 30-44 | 45-64   | 65+   | White   | Black   | Hispanic |
| Yes, in 2020     | 58%     | 59%     | 58%     | 38%   | 48%   | 67%     | 78%   | 67%     | 54%     | 35%      |
| Yes, in 2016     | 46%     | 46%     | 45%     | 20%   | 39%   | 54%     | 66%   | 54%     | 37%     | 24%      |
| Yes, before 2016 | 40%     | 42%     | 38%     | 8%    | 36%   | 49%     | 63%   | 47%     | 32%     | 23%      |
| No, not lately   | 17%     | 17%     | 17%     | 19%   | 21%   | 15%     | 14%   | 15%     | 18%     | 24%      |
| No, not eligible | 9%      | 10%     | 9%      | 16%   | 11%   | 8%      | 3%    | 6%      | 8%      | 19%      |
| Don't recall     | 9%      | 9%      | 9%      | 16%   | 12%   | 5%      | 4%    | 7%      | 13%     | 13%      |
| Unweighted N     | (3,281) | (1,406) | (1,875) | (734) | (700) | (1,151) | (696) | (1,329) | (1,350) | (411)    |

|                  | Total   | Party ID |       |       | Registered Voters<br>Voters | Region    |         |         |       |
|------------------|---------|----------|-------|-------|-----------------------------|-----------|---------|---------|-------|
|                  |         | Dem      | Rep   | Ind   |                             | Northeast | Midwest | South   | West  |
| Yes, in 2020     | 58%     | 67%      | 68%   | 53%   | 77%                         | 56%       | 60%     | 56%     | 61%   |
| Yes, in 2016     | 46%     | 52%      | 54%   | 40%   | 61%                         | 44%       | 48%     | 43%     | 49%   |
| Yes, before 2016 | 40%     | 47%      | 45%   | 37%   | 53%                         | 39%       | 40%     | 36%     | 47%   |
| No, not lately   | 17%     | 13%      | 13%   | 20%   | 8%                          | 17%       | 17%     | 17%     | 17%   |
| No, not eligible | 9%      | 7%       | 6%    | 11%   | 2%                          | 9%        | 8%      | 10%     | 9%    |
| Don't recall     | 9%      | 7%       | 6%    | 9%    | 6%                          | 11%       | 9%      | 9%      | 8%    |
| Unweighted N     | (3,281) | (1,397)  | (661) | (857) | (2,412)                     | (593)     | (620)   | (1,447) | (621) |

**14. Republican Candidate with Best Chance**

Regardless of whom you support, which Republican candidate do you think has the best chance of winning the party's nomination?

|                 | Total   | Gender  |         | Age   |       |         |       | Race    |         |          |
|-----------------|---------|---------|---------|-------|-------|---------|-------|---------|---------|----------|
|                 |         | Male    | Female  | 18-29 | 30-44 | 45-64   | 65+   | White   | Black   | Hispanic |
| Chris Christie  | 4%      | 3%      | 4%      | 3%    | 4%    | 4%      | 4%    | 3%      | 8%      | 5%       |
| Ron DeSantis    | 11%     | 11%     | 11%     | 15%   | 10%   | 11%     | 8%    | 11%     | 10%     | 12%      |
| Nikki Haley     | 8%      | 7%      | 8%      | 6%    | 6%    | 8%      | 10%   | 8%      | 7%      | 9%       |
| Mike Pence      | 8%      | 6%      | 9%      | 9%    | 8%    | 7%      | 7%    | 6%      | 11%     | 9%       |
| Vivek Ramaswamy | 3%      | 2%      | 3%      | 3%    | 4%    | 2%      | 1%    | 2%      | 4%      | 3%       |
| Tim Scott       | 3%      | 3%      | 3%      | 5%    | 4%    | 1%      | 2%    | 2%      | 5%      | 5%       |
| Donald Trump    | 57%     | 64%     | 51%     | 52%   | 56%   | 59%     | 62%   | 63%     | 42%     | 51%      |
| Somebody else   | 7%      | 4%      | 9%      | 7%    | 8%    | 8%      | 5%    | 5%      | 13%     | 7%       |
| Totals          | 101%    | 100%    | 98%     | 100%  | 100%  | 100%    | 99%   | 100%    | 100%    | 101%     |
| Unweighted N    | (3,219) | (1,384) | (1,835) | (709) | (690) | (1,132) | (688) | (1,316) | (1,310) | (405)    |

|                 | Total   | Party ID |       |       | Registered Voters | Region |           |         |       |
|-----------------|---------|----------|-------|-------|-------------------|--------|-----------|---------|-------|
|                 |         | Dem      | Rep   | Ind   |                   | Voters | Northeast | Midwest | South |
| Chris Christie  | 4%      | 8%       | 1%    | 3%    | 4%                | 7%     | 2%        | 4%      | 3%    |
| Ron DeSantis    | 11%     | 11%      | 11%   | 11%   | 11%               | 7%     | 13%       | 13%     | 10%   |
| Nikki Haley     | 8%      | 11%      | 5%    | 8%    | 8%                | 7%     | 8%        | 7%      | 10%   |
| Mike Pence      | 8%      | 11%      | 4%    | 7%    | 6%                | 7%     | 8%        | 7%      | 9%    |
| Vivek Ramaswamy | 3%      | 2%       | 3%    | 3%    | 3%                | 3%     | 3%        | 3%      | 2%    |
| Tim Scott       | 3%      | 4%       | 2%    | 3%    | 2%                | 3%     | 2%        | 3%      | 4%    |
| Donald Trump    | 57%     | 45%      | 73%   | 58%   | 59%               | 60%    | 59%       | 57%     | 54%   |
| Somebody else   | 7%      | 8%       | 1%    | 7%    | 6%                | 5%     | 6%        | 7%      | 9%    |
| Totals          | 101%    | 100%     | 100%  | 100%  | 99%               | 99%    | 101%      | 101%    | 101%  |
| Unweighted N    | (3,219) | (1,372)  | (653) | (844) | (2,382)           | (583)  | (604)     | (1,423) | (609) |

**15. Primary Election Vote**

If the presidential primary election or caucus in your state was being held today, for whom would you vote?

|                 | Total   | Gender  |         | Age   |       |         |       | Race    |         |          |
|-----------------|---------|---------|---------|-------|-------|---------|-------|---------|---------|----------|
|                 |         | Male    | Female  | 18-29 | 30-44 | 45-64   | 65+   | White   | Black   | Hispanic |
| Chris Christie  | 3%      | 4%      | 3%      | 3%    | 2%    | 4%      | 4%    | 4%      | 4%      | 3%       |
| Ron DeSantis    | 7%      | 8%      | 7%      | 9%    | 6%    | 6%      | 10%   | 9%      | 4%      | 6%       |
| Nikki Haley     | 7%      | 7%      | 8%      | 5%    | 7%    | 9%      | 7%    | 8%      | 3%      | 6%       |
| Mike Pence      | 5%      | 4%      | 5%      | 6%    | 4%    | 5%      | 4%    | 4%      | 4%      | 5%       |
| Vivek Ramaswamy | 3%      | 3%      | 3%      | 2%    | 5%    | 3%      | 2%    | 3%      | 2%      | 3%       |
| Tim Scott       | 2%      | 2%      | 2%      | 3%    | 3%    | 1%      | 1%    | 1%      | 3%      | 3%       |
| Donald Trump    | 32%     | 34%     | 31%     | 29%   | 36%   | 33%     | 32%   | 37%     | 19%     | 30%      |
| Joe Biden       | 29%     | 30%     | 29%     | 35%   | 26%   | 28%     | 31%   | 25%     | 46%     | 34%      |
| Somebody else   | 10%     | 8%      | 12%     | 8%    | 13%   | 11%     | 8%    | 9%      | 14%     | 10%      |
| Totals          | 98%     | 100%    | 100%    | 100%  | 102%  | 100%    | 99%   | 100%    | 99%     | 100%     |
| Unweighted N    | (3,225) | (1,387) | (1,838) | (713) | (688) | (1,134) | (690) | (1,316) | (1,316) | (404)    |

|                 | Total | Party ID |      |      | Registered Voters |  | Region    |         |       |      |
|-----------------|-------|----------|------|------|-------------------|--|-----------|---------|-------|------|
|                 |       | Dem      | Rep  | Ind  | Voters            |  | Northeast | Midwest | South | West |
| Chris Christie  | 3%    | 4%       | 1%   | 5%   | 4%                |  | 5%        | 3%      | 3%    | 3%   |
| Ron DeSantis    | 7%    | 2%       | 15%  | 8%   | 8%                |  | 7%        | 7%      | 8%    | 6%   |
| Nikki Haley     | 7%    | 5%       | 7%   | 11%  | 8%                |  | 6%        | 9%      | 8%    | 6%   |
| Mike Pence      | 5%    | 4%       | 5%   | 5%   | 3%                |  | 5%        | 5%      | 4%    | 5%   |
| Vivek Ramaswamy | 3%    | 1%       | 4%   | 5%   | 4%                |  | 4%        | 3%      | 3%    | 3%   |
| Tim Scott       | 2%    | 2%       | 2%   | 2%   | 2%                |  | 1%        | 3%      | 2%    | 2%   |
| Donald Trump    | 32%   | 7%       | 62%  | 32%  | 32%               |  | 30%       | 32%     | 36%   | 29%  |
| Joe Biden       | 29%   | 66%      | 3%   | 21%  | 31%               |  | 33%       | 30%     | 25%   | 35%  |
| Somebody else   | 10%   | 10%      | 2%   | 12%  | 9%                |  | 9%        | 8%      | 11%   | 11%  |
| Totals          | 98%   | 101%     | 101% | 101% | 101%              |  | 100%      | 100%    | 100%  | 100% |

continued on the next page ...

| continued from previous page |         |          |       |       |                   |           |         |         |       |
|------------------------------|---------|----------|-------|-------|-------------------|-----------|---------|---------|-------|
|                              | Total   | Party ID |       |       | Registered Voters | Region    |         |         |       |
|                              |         | Dem      | Rep   | Ind   | Voters            | Northeast | Midwest | South   | West  |
| Unweighted N                 | (3,225) | (1,382)  | (654) | (838) | (2,386)           | (584)     | (607)   | (1,421) | (613) |

# TASS - Wave 1 - October 2023

October 16 - 24, 2023 - 3281 U.S. Adults



## 16. Candidate with Best Chance

Regardless of whom you support, which Democratic or Republican candidate do you think has the best chance of winning the general election in November of 2024 if nominated by his or her party?

|                 | Total   | Gender  |         | Age   |       |         |       | Race    |         |          |
|-----------------|---------|---------|---------|-------|-------|---------|-------|---------|---------|----------|
|                 |         | Male    | Female  | 18-29 | 30-44 | 45-64   | 65+   | White   | Black   | Hispanic |
| Chris Christie  | 2%      | 2%      | 2%      | 3%    | 1%    | 2%      | 3%    | 2%      | 2%      | 3%       |
| Ron DeSantis    | 7%      | 6%      | 8%      | 6%    | 6%    | 8%      | 8%    | 7%      | 4%      | 7%       |
| Nikki Haley     | 4%      | 5%      | 4%      | 4%    | 4%    | 4%      | 6%    | 5%      | 4%      | 3%       |
| Mike Pence      | 4%      | 3%      | 6%      | 5%    | 6%    | 3%      | 4%    | 4%      | 5%      | 5%       |
| Vivek Ramaswamy | 2%      | 2%      | 2%      | 3%    | 3%    | 2%      | 1%    | 2%      | 3%      | 2%       |
| Tim Scott       | 2%      | 1%      | 2%      | 4%    | 3%    | 1%      | 1%    | 1%      | 3%      | 4%       |
| Donald Trump    | 38%     | 40%     | 36%     | 32%   | 41%   | 41%     | 37%   | 43%     | 21%     | 36%      |
| Joe Biden       | 34%     | 36%     | 31%     | 38%   | 29%   | 33%     | 36%   | 31%     | 49%     | 33%      |
| Somebody else   | 6%      | 4%      | 8%      | 6%    | 7%    | 6%      | 4%    | 5%      | 9%      | 6%       |
| Totals          | 99%     | 99%     | 99%     | 101%  | 100%  | 100%    | 100%  | 100%    | 100%    | 99%      |
| Unweighted N    | (3,227) | (1,391) | (1,836) | (714) | (691) | (1,136) | (686) | (1,315) | (1,319) | (405)    |

|                 | Total | Party ID |     |     | Registered Voters | Region    |         |       |      |
|-----------------|-------|----------|-----|-----|-------------------|-----------|---------|-------|------|
|                 |       | Dem      | Rep | Ind |                   | Northeast | Midwest | South | West |
| Chris Christie  | 2%    | 3%       | 1%  | 3%  | 2%                | 4%        | 1%      | 2%    | 2%   |
| Ron DeSantis    | 7%    | 4%       | 11% | 7%  | 7%                | 5%        | 8%      | 8%    | 5%   |
| Nikki Haley     | 4%    | 3%       | 5%  | 6%  | 5%                | 5%        | 5%      | 4%    | 3%   |
| Mike Pence      | 4%    | 4%       | 4%  | 5%  | 3%                | 5%        | 4%      | 4%    | 5%   |
| Vivek Ramaswamy | 2%    | 1%       | 3%  | 3%  | 2%                | 3%        | 3%      | 1%    | 2%   |
| Tim Scott       | 2%    | 3%       | 2%  | 1%  | 1%                | 1%        | 2%      | 2%    | 2%   |
| Donald Trump    | 38%   | 13%      | 66% | 38% | 38%               | 37%       | 35%     | 43%   | 35%  |
| Joe Biden       | 34%   | 66%      | 7%  | 29% | 37%               | 35%       | 35%     | 28%   | 41%  |
| Somebody else   | 6%    | 5%       | 2%  | 6%  | 5%                | 5%        | 6%      | 7%    | 5%   |

continued on the next page . . .

| continued from previous page |         |          |       |       |                   |           |         |         |       |
|------------------------------|---------|----------|-------|-------|-------------------|-----------|---------|---------|-------|
|                              | Total   | Party ID |       |       | Registered Voters | Region    |         |         |       |
|                              |         | Dem      | Rep   | Ind   | Voters            | Northeast | Midwest | South   | West  |
| Totals                       | 99%     | 102%     | 101%  | 98%   | 100%              | 100%      | 99%     | 99%     | 100%  |
| Unweighted N                 | (3,227) | (1,384)  | (652) | (838) | (2,386)           | (584)     | (607)   | (1,426) | (610) |



**TASS - Wave 1 - October 2023**  
**October 16 - 24, 2023 - 3281 U.S. Adults**



**17. Battery A - Woman and Power**

Please tell us whether you agree or disagree with the following statement: Women seek to gain power by getting control over men.

*Shown to a random 2/3 of respondents*

|                   | Total   | Gender |         | Age   |       |       |       | Race  |       |          |
|-------------------|---------|--------|---------|-------|-------|-------|-------|-------|-------|----------|
|                   |         | Male   | Female  | 18-29 | 30-44 | 45-64 | 65+   | White | Black | Hispanic |
| Strongly disagree | 17%     | 12%    | 22%     | 12%   | 17%   | 19%   | 20%   | 16%   | 19%   | 18%      |
| Disagree          | 23%     | 19%    | 27%     | 16%   | 22%   | 26%   | 27%   | 24%   | 19%   | 20%      |
| Somewhat disagree | 21%     | 23%    | 19%     | 23%   | 20%   | 18%   | 23%   | 21%   | 20%   | 21%      |
| Somewhat agree    | 24%     | 27%    | 20%     | 28%   | 27%   | 22%   | 18%   | 24%   | 20%   | 25%      |
| Agree             | 10%     | 11%    | 8%      | 12%   | 9%    | 9%    | 8%    | 9%    | 13%   | 10%      |
| Strongly agree    | 6%      | 7%     | 4%      | 9%    | 4%    | 6%    | 4%    | 5%    | 9%    | 5%       |
| Totals            | 101%    | 99%    | 100%    | 100%  | 99%   | 100%  | 100%  | 99%   | 100%  | 99%      |
| Unweighted N      | (2,181) | (929)  | (1,252) | (494) | (464) | (760) | (463) | (884) | (899) | (268)    |

|                   | Total   | Party ID |       |       | Registered Voters |  | Region    |         |       |       |
|-------------------|---------|----------|-------|-------|-------------------|--|-----------|---------|-------|-------|
|                   |         | Dem      | Rep   | Ind   | Voters            |  | Northeast | Midwest | South | West  |
| Strongly disagree | 17%     | 28%      | 12%   | 13%   | 19%               |  | 15%       | 15%     | 18%   | 20%   |
| Disagree          | 23%     | 28%      | 21%   | 22%   | 24%               |  | 27%       | 23%     | 21%   | 25%   |
| Somewhat disagree | 21%     | 16%      | 19%   | 25%   | 20%               |  | 21%       | 26%     | 20%   | 19%   |
| Somewhat agree    | 24%     | 17%      | 28%   | 27%   | 22%               |  | 25%       | 24%     | 23%   | 23%   |
| Agree             | 10%     | 8%       | 13%   | 8%    | 10%               |  | 7%        | 7%      | 12%   | 9%    |
| Strongly agree    | 6%      | 4%       | 8%    | 5%    | 5%                |  | 5%        | 5%      | 7%    | 5%    |
| Totals            | 101%    | 101%     | 101%  | 100%  | 100%              |  | 100%      | 100%    | 101%  | 101%  |
| Unweighted N      | (2,181) | (932)    | (423) | (583) | (1,597)           |  | (398)     | (381)   | (969) | (433) |

**TASS - Wave 1 - October 2023**  
**October 16 - 24, 2023 - 3281 U.S. Adults**



**18. Battery A - Woman Should be Cherished**

Please tell us whether you agree or disagree with the following statement: Women should be cherished and protected by men.

*Shown to a random 2/3 of respondents*

|                   | Total   | Gender |         | Age   |       |       |       | Race  |       |          |
|-------------------|---------|--------|---------|-------|-------|-------|-------|-------|-------|----------|
|                   |         | Male   | Female  | 18-29 | 30-44 | 45-64 | 65+   | White | Black | Hispanic |
| Strongly disagree | 3%      | 3%     | 4%      | 3%    | 5%    | 2%    | 5%    | 3%    | 3%    | 6%       |
| Disagree          | 5%      | 6%     | 5%      | 5%    | 3%    | 7%    | 6%    | 6%    | 4%    | 4%       |
| Somewhat disagree | 11%     | 10%    | 11%     | 12%   | 10%   | 9%    | 11%   | 9%    | 7%    | 15%      |
| Somewhat agree    | 30%     | 29%    | 32%     | 30%   | 30%   | 32%   | 30%   | 34%   | 22%   | 26%      |
| Agree             | 24%     | 26%    | 22%     | 23%   | 21%   | 24%   | 30%   | 24%   | 26%   | 23%      |
| Strongly agree    | 26%     | 27%    | 25%     | 28%   | 31%   | 26%   | 18%   | 24%   | 38%   | 26%      |
| Totals            | 99%     | 101%   | 99%     | 101%  | 100%  | 100%  | 100%  | 100%  | 100%  | 100%     |
| Unweighted N      | (2,178) | (928)  | (1,250) | (493) | (464) | (759) | (462) | (882) | (898) | (269)    |

|                   | Total   | Party ID |       |       | Registered Voters |  | Region    |         |       |       |
|-------------------|---------|----------|-------|-------|-------------------|--|-----------|---------|-------|-------|
|                   |         | Dem      | Rep   | Ind   | Voters            |  | Northeast | Midwest | South | West  |
| Strongly disagree | 3%      | 4%       | 2%    | 2%    | 3%                |  | 3%        | 3%      | 3%    | 4%    |
| Disagree          | 5%      | 7%       | 5%    | 5%    | 6%                |  | 6%        | 5%      | 6%    | 5%    |
| Somewhat disagree | 11%     | 13%      | 8%    | 9%    | 10%               |  | 11%       | 13%     | 8%    | 12%   |
| Somewhat agree    | 30%     | 29%      | 24%   | 39%   | 31%               |  | 30%       | 35%     | 27%   | 32%   |
| Agree             | 24%     | 22%      | 31%   | 21%   | 24%               |  | 24%       | 23%     | 27%   | 21%   |
| Strongly agree    | 26%     | 24%      | 31%   | 24%   | 26%               |  | 26%       | 22%     | 28%   | 24%   |
| Totals            | 99%     | 99%      | 101%  | 100%  | 100%              |  | 100%      | 101%    | 99%   | 98%   |
| Unweighted N      | (2,178) | (929)    | (423) | (582) | (1,594)           |  | (399)     | (382)   | (964) | (433) |

**TASS - Wave 1 - October 2023**  
**October 16 - 24, 2023 - 3281 U.S. Adults**



**19. Battery A - Woman Exaggerate**

How often do women exaggerate problems they have at work?

*Shown to a random 2/3 of respondents*

|              | Total   | Gender |         | Age   |       |       |       | Race  |       |          |
|--------------|---------|--------|---------|-------|-------|-------|-------|-------|-------|----------|
|              |         | Male   | Female  | 18-29 | 30-44 | 45-64 | 65+   | White | Black | Hispanic |
| Always       | 4%      | 6%     | 3%      | 9%    | 5%    | 4%    | 1%    | 3%    | 8%    | 6%       |
| Often        | 18%     | 22%    | 14%     | 22%   | 17%   | 17%   | 16%   | 19%   | 17%   | 15%      |
| Sometimes    | 49%     | 48%    | 49%     | 49%   | 45%   | 48%   | 54%   | 49%   | 47%   | 49%      |
| Rarely       | 25%     | 19%    | 30%     | 13%   | 27%   | 28%   | 28%   | 26%   | 20%   | 23%      |
| Never        | 5%      | 4%     | 5%      | 8%    | 6%    | 3%    | 2%    | 3%    | 8%    | 8%       |
| Totals       | 101%    | 99%    | 101%    | 101%  | 100%  | 100%  | 101%  | 100%  | 100%  | 101%     |
| Unweighted N | (2,177) | (926)  | (1,251) | (494) | (464) | (759) | (460) | (881) | (898) | (269)    |

|              | Total   | Party ID |       |       | Registered Voters |  | Region    |         |       |       |
|--------------|---------|----------|-------|-------|-------------------|--|-----------|---------|-------|-------|
|              |         | Dem      | Rep   | Ind   | Voters            |  | Northeast | Midwest | South | West  |
| Always       | 4%      | 3%       | 5%    | 4%    | 4%                |  | 5%        | 2%      | 5%    | 4%    |
| Often        | 18%     | 12%      | 24%   | 19%   | 18%               |  | 16%       | 17%     | 20%   | 17%   |
| Sometimes    | 49%     | 47%      | 53%   | 46%   | 47%               |  | 57%       | 46%     | 47%   | 46%   |
| Rarely       | 25%     | 33%      | 14%   | 26%   | 27%               |  | 18%       | 30%     | 22%   | 29%   |
| Never        | 5%      | 5%       | 3%    | 5%    | 4%                |  | 4%        | 4%      | 5%    | 4%    |
| Totals       | 101%    | 100%     | 99%   | 100%  | 100%              |  | 100%      | 99%     | 99%   | 100%  |
| Unweighted N | (2,177) | (931)    | (422) | (582) | (1,596)           |  | (397)     | (382)   | (967) | (431) |

# TASS - Wave 1 - October 2023

## October 16 - 24, 2023 - 3281 U.S. Adults

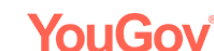

### 20A. Battery B - Describe Men — A strong leader

Now, we'd like to ask you how well some phrases describe different kinds of people in society. How well does each of these describe most men?

*Shown to a random 1/3 of respondents*

|              | Total   | Gender |        | Age   |       |       |       | Race  |       |          |
|--------------|---------|--------|--------|-------|-------|-------|-------|-------|-------|----------|
|              |         | Male   | Female | 18-29 | 30-44 | 45-64 | 65+   | White | Black | Hispanic |
| Extremely    | 13%     | 15%    | 11%    | 20%   | 16%   | 9%    | 10%   | 10%   | 19%   | 16%      |
| Very         | 29%     | 28%    | 31%    | 34%   | 27%   | 28%   | 30%   | 29%   | 30%   | 33%      |
| Moderately   | 43%     | 46%    | 41%    | 34%   | 39%   | 48%   | 50%   | 46%   | 34%   | 40%      |
| Slightly     | 9%      | 7%     | 11%    | 7%    | 11%   | 11%   | 7%    | 10%   | 10%   | 5%       |
| Not at all   | 5%      | 4%     | 7%     | 7%    | 8%    | 4%    | 3%    | 5%    | 7%    | 6%       |
| Totals       | 99%     | 100%   | 101%   | 102%  | 101%  | 100%  | 100%  | 100%  | 100%  | 100%     |
| Unweighted N | (1,085) | (470)  | (615)  | (237) | (233) | (386) | (229) | (442) | (446) | (137)    |

|              | Total   | Party ID |       |       | Registered Voters |  | Region    |         |       |       |
|--------------|---------|----------|-------|-------|-------------------|--|-----------|---------|-------|-------|
|              |         | Dem      | Rep   | Ind   | Voters            |  | Northeast | Midwest | South | West  |
| Extremely    | 13%     | 12%      | 14%   | 14%   | 13%               |  | 16%       | 10%     | 12%   | 15%   |
| Very         | 29%     | 29%      | 40%   | 23%   | 28%               |  | 34%       | 28%     | 29%   | 27%   |
| Moderately   | 43%     | 46%      | 37%   | 46%   | 46%               |  | 40%       | 43%     | 44%   | 44%   |
| Slightly     | 9%      | 9%       | 6%    | 10%   | 8%                |  | 8%        | 10%     | 9%    | 9%    |
| Not at all   | 5%      | 4%       | 4%    | 7%    | 5%                |  | 2%        | 9%      | 5%    | 4%    |
| Totals       | 99%     | 100%     | 101%  | 100%  | 100%              |  | 100%      | 100%    | 99%   | 99%   |
| Unweighted N | (1,085) | (460)    | (233) | (271) | (803)             |  | (193)     | (235)   | (470) | (187) |

# TASS - Wave 1 - October 2023

October 16 - 24, 2023 - 3281 U.S. Adults



## 20B. Battery B - Describe Men — Smart

Now, we'd like to ask you how well some phrases describe different kinds of people in society. How well does each of these describe most men?

*Shown to a random 1/3 of respondents*

|              | Total   | Gender |        | Age   |       |       |       | Race  |       |          |
|--------------|---------|--------|--------|-------|-------|-------|-------|-------|-------|----------|
|              |         | Male   | Female | 18-29 | 30-44 | 45-64 | 65+   | White | Black | Hispanic |
| Extremely    | 9%      | 9%     | 9%     | 20%   | 6%    | 6%    | 8%    | 8%    | 12%   | 10%      |
| Very         | 29%     | 29%    | 29%    | 27%   | 31%   | 27%   | 31%   | 29%   | 28%   | 31%      |
| Moderately   | 50%     | 50%    | 50%    | 38%   | 55%   | 53%   | 52%   | 53%   | 42%   | 48%      |
| Slightly     | 8%      | 9%     | 7%     | 8%    | 4%    | 11%   | 7%    | 7%    | 12%   | 6%       |
| Not at all   | 4%      | 3%     | 5%     | 6%    | 5%    | 3%    | 2%    | 3%    | 5%    | 6%       |
| Totals       | 100%    | 100%   | 100%   | 99%   | 101%  | 100%  | 100%  | 100%  | 99%   | 101%     |
| Unweighted N | (1,083) | (469)  | (614)  | (236) | (233) | (386) | (228) | (441) | (445) | (137)    |

|              | Total   | Party ID |       |       | Registered Voters |  | Region    |         |       |       |
|--------------|---------|----------|-------|-------|-------------------|--|-----------|---------|-------|-------|
|              |         | Dem      | Rep   | Ind   | Voters            |  | Northeast | Midwest | South | West  |
| Extremely    | 9%      | 9%       | 10%   | 8%    | 9%                |  | 13%       | 6%      | 8%    | 12%   |
| Very         | 29%     | 30%      | 33%   | 28%   | 27%               |  | 32%       | 26%     | 31%   | 27%   |
| Moderately   | 50%     | 48%      | 50%   | 50%   | 53%               |  | 45%       | 55%     | 49%   | 50%   |
| Slightly     | 8%      | 9%       | 5%    | 9%    | 8%                |  | 7%        | 7%      | 8%    | 9%    |
| Not at all   | 4%      | 4%       | 1%    | 5%    | 3%                |  | 3%        | 6%      | 4%    | 2%    |
| Totals       | 100%    | 100%     | 99%   | 100%  | 100%              |  | 100%      | 100%    | 100%  | 100%  |
| Unweighted N | (1,083) | (459)    | (232) | (271) | (801)             |  | (193)     | (234)   | (470) | (186) |

# TASS - Wave 1 - October 2023

October 16 - 24, 2023 - 3281 U.S. Adults



## 20C. Battery B - Describe Men — Honest

Now, we'd like to ask you how well some phrases describe different kinds of people in society. How well does each of these describe most men?

*Shown to a random 1/3 of respondents*

|              | Total   | Gender |        | Age   |       |       |       | Race  |       |          |
|--------------|---------|--------|--------|-------|-------|-------|-------|-------|-------|----------|
|              |         | Male   | Female | 18-29 | 30-44 | 45-64 | 65+   | White | Black | Hispanic |
| Extremely    | 7%      | 9%     | 5%     | 14%   | 6%    | 4%    | 6%    | 6%    | 11%   | 9%       |
| Very         | 20%     | 25%    | 15%    | 23%   | 25%   | 13%   | 23%   | 21%   | 20%   | 18%      |
| Moderately   | 49%     | 50%    | 48%    | 39%   | 42%   | 59%   | 53%   | 49%   | 42%   | 52%      |
| Slightly     | 17%     | 11%    | 22%    | 16%   | 17%   | 17%   | 15%   | 17%   | 18%   | 12%      |
| Not at all   | 7%      | 6%     | 9%     | 8%    | 10%   | 7%    | 3%    | 7%    | 9%    | 9%       |
| Totals       | 100%    | 101%   | 99%    | 100%  | 100%  | 100%  | 100%  | 100%  | 100%  | 100%     |
| Unweighted N | (1,081) | (468)  | (613)  | (235) | (232) | (386) | (228) | (442) | (443) | (137)    |

|              | Total   | Party ID |       |       | Registered Voters |  | Region    |         |       |       |
|--------------|---------|----------|-------|-------|-------------------|--|-----------|---------|-------|-------|
|              |         | Dem      | Rep   | Ind   | Voters            |  | Northeast | Midwest | South | West  |
| Extremely    | 7%      | 7%       | 7%    | 6%    | 6%                |  | 6%        | 4%      | 7%    | 11%   |
| Very         | 20%     | 18%      | 26%   | 19%   | 21%               |  | 29%       | 18%     | 18%   | 19%   |
| Moderately   | 49%     | 50%      | 47%   | 53%   | 50%               |  | 48%       | 47%     | 51%   | 49%   |
| Slightly     | 17%     | 19%      | 14%   | 16%   | 17%               |  | 11%       | 20%     | 18%   | 16%   |
| Not at all   | 7%      | 6%       | 5%    | 7%    | 6%                |  | 7%        | 11%     | 7%    | 4%    |
| Totals       | 100%    | 100%     | 99%   | 101%  | 100%              |  | 101%      | 100%    | 101%  | 99%   |
| Unweighted N | (1,081) | (457)    | (233) | (271) | (801)             |  | (193)     | (235)   | (468) | (185) |

# TASS - Wave 1 - October 2023

October 16 - 24, 2023 - 3281 U.S. Adults



## 20D. Battery B - Describe Men — Cares about other people

Now, we'd like to ask you how well some phrases describe different kinds of people in society. How well does each of these describe most men?

*Shown to a random 1/3 of respondents*

|              | Total   | Gender |        | Age   |       |       |       | Race  |       |          |
|--------------|---------|--------|--------|-------|-------|-------|-------|-------|-------|----------|
|              |         | Male   | Female | 18-29 | 30-44 | 45-64 | 65+   | White | Black | Hispanic |
| Extremely    | 8%      | 10%    | 5%     | 14%   | 10%   | 4%    | 4%    | 6%    | 16%   | 5%       |
| Very         | 21%     | 23%    | 19%    | 24%   | 19%   | 18%   | 24%   | 18%   | 17%   | 29%      |
| Moderately   | 48%     | 48%    | 49%    | 38%   | 41%   | 59%   | 50%   | 53%   | 39%   | 44%      |
| Slightly     | 18%     | 15%    | 20%    | 18%   | 21%   | 15%   | 19%   | 18%   | 19%   | 16%      |
| Not at all   | 6%      | 4%     | 8%     | 7%    | 9%    | 5%    | 3%    | 5%    | 8%    | 7%       |
| Totals       | 101%    | 100%   | 101%   | 101%  | 100%  | 101%  | 100%  | 100%  | 99%   | 101%     |
| Unweighted N | (1,079) | (470)  | (609)  | (234) | (231) | (386) | (228) | (440) | (443) | (137)    |

|              | Total   | Party ID |       |       | Registered Voters |  | Region    |         |       |       |
|--------------|---------|----------|-------|-------|-------------------|--|-----------|---------|-------|-------|
|              |         | Dem      | Rep   | Ind   | Voters            |  | Northeast | Midwest | South | West  |
| Extremely    | 8%      | 8%       | 8%    | 7%    | 7%                |  | 7%        | 4%      | 7%    | 12%   |
| Very         | 21%     | 19%      | 30%   | 18%   | 20%               |  | 25%       | 18%     | 21%   | 18%   |
| Moderately   | 48%     | 51%      | 46%   | 49%   | 49%               |  | 44%       | 51%     | 49%   | 46%   |
| Slightly     | 18%     | 18%      | 15%   | 17%   | 18%               |  | 22%       | 17%     | 16%   | 18%   |
| Not at all   | 6%      | 5%       | 2%    | 9%    | 5%                |  | 2%        | 9%      | 6%    | 5%    |
| Totals       | 101%    | 101%     | 101%  | 100%  | 99%               |  | 100%      | 99%     | 99%   | 99%   |
| Unweighted N | (1,079) | (457)    | (231) | (271) | (798)             |  | (192)     | (232)   | (469) | (186) |

# TASS - Wave 1 - October 2023

October 16 - 24, 2023 - 3281 U.S. Adults



## 20E. Battery B - Describe Men — Likable

Now, we'd like to ask you how well some phrases describe different kinds of people in society. How well does each of these describe most men?

*Shown to a random 1/3 of respondents*

|              | Total   | Gender |        | Age   |       |       |       | Race  |       |          |
|--------------|---------|--------|--------|-------|-------|-------|-------|-------|-------|----------|
|              |         | Male   | Female | 18-29 | 30-44 | 45-64 | 65+   | White | Black | Hispanic |
| Extremely    | 8%      | 9%     | 6%     | 13%   | 9%    | 4%    | 7%    | 6%    | 14%   | 6%       |
| Very         | 25%     | 26%    | 25%    | 28%   | 22%   | 24%   | 29%   | 24%   | 24%   | 32%      |
| Moderately   | 52%     | 49%    | 54%    | 47%   | 48%   | 55%   | 56%   | 55%   | 45%   | 51%      |
| Slightly     | 11%     | 12%    | 11%    | 7%    | 17%   | 12%   | 7%    | 12%   | 9%    | 8%       |
| Not at all   | 4%      | 4%     | 4%     | 4%    | 5%    | 4%    | 1%    | 3%    | 7%    | 4%       |
| Totals       | 100%    | 100%   | 100%   | 99%   | 101%  | 99%   | 100%  | 100%  | 99%   | 101%     |
| Unweighted N | (1,084) | (471)  | (613)  | (237) | (232) | (386) | (229) | (442) | (444) | (138)    |

|              | Total   | Party ID |       |       | Registered Voters |  | Region    |         |       |       |
|--------------|---------|----------|-------|-------|-------------------|--|-----------|---------|-------|-------|
|              |         | Dem      | Rep   | Ind   | Voters            |  | Northeast | Midwest | South | West  |
| Extremely    | 8%      | 8%       | 7%    | 8%    | 8%                |  | 11%       | 7%      | 6%    | 9%    |
| Very         | 25%     | 26%      | 34%   | 20%   | 27%               |  | 26%       | 21%     | 24%   | 32%   |
| Moderately   | 52%     | 54%      | 48%   | 54%   | 52%               |  | 44%       | 54%     | 57%   | 45%   |
| Slightly     | 11%     | 10%      | 10%   | 13%   | 11%               |  | 14%       | 14%     | 8%    | 12%   |
| Not at all   | 4%      | 3%       | 1%    | 6%    | 3%                |  | 4%        | 5%      | 5%    | 2%    |
| Totals       | 100%    | 101%     | 100%  | 101%  | 101%              |  | 99%       | 101%    | 100%  | 100%  |
| Unweighted N | (1,084) | (459)    | (233) | (271) | (802)             |  | (192)     | (233)   | (472) | (187) |



# TASS - Wave 1 - October 2023

October 16 - 24, 2023 - 3281 U.S. Adults



## 20F. Battery B - Describe Men — Mean

Now, we'd like to ask you how well some phrases describe different kinds of people in society. How well does each of these describe most men?

*Shown to a random 1/3 of respondents*

|              | Total   | Gender |        | Age   |       |       |       | Race  |       |          |
|--------------|---------|--------|--------|-------|-------|-------|-------|-------|-------|----------|
|              |         | Male   | Female | 18-29 | 30-44 | 45-64 | 65+   | White | Black | Hispanic |
| Extremely    | 6%      | 7%     | 5%     | 13%   | 6%    | 4%    | 2%    | 5%    | 10%   | 7%       |
| Very         | 18%     | 18%    | 18%    | 19%   | 27%   | 13%   | 13%   | 14%   | 21%   | 25%      |
| Moderately   | 39%     | 37%    | 41%    | 40%   | 38%   | 44%   | 32%   | 41%   | 38%   | 35%      |
| Slightly     | 26%     | 29%    | 24%    | 20%   | 18%   | 30%   | 38%   | 30%   | 20%   | 20%      |
| Not at all   | 11%     | 10%    | 12%    | 9%    | 11%   | 9%    | 16%   | 10%   | 11%   | 12%      |
| Totals       | 100%    | 101%   | 100%   | 101%  | 100%  | 100%  | 101%  | 100%  | 100%  | 99%      |
| Unweighted N | (1,081) | (469)  | (612)  | (237) | (230) | (385) | (229) | (440) | (446) | (137)    |

|              | Total   | Party ID |       |       | Registered Voters |  | Region    |         |       |       |
|--------------|---------|----------|-------|-------|-------------------|--|-----------|---------|-------|-------|
|              |         | Dem      | Rep   | Ind   | Voters            |  | Northeast | Midwest | South | West  |
| Extremely    | 6%      | 9%       | 4%    | 5%    | 6%                |  | 8%        | 5%      | 6%    | 4%    |
| Very         | 18%     | 18%      | 19%   | 14%   | 17%               |  | 24%       | 15%     | 17%   | 18%   |
| Moderately   | 39%     | 39%      | 35%   | 42%   | 38%               |  | 37%       | 42%     | 37%   | 42%   |
| Slightly     | 26%     | 24%      | 31%   | 28%   | 29%               |  | 22%       | 26%     | 28%   | 28%   |
| Not at all   | 11%     | 9%       | 11%   | 11%   | 11%               |  | 9%        | 13%     | 12%   | 8%    |
| Totals       | 100%    | 99%      | 100%  | 100%  | 101%              |  | 100%      | 101%    | 100%  | 100%  |
| Unweighted N | (1,081) | (460)    | (233) | (268) | (802)             |  | (194)     | (235)   | (468) | (184) |

# TASS - Wave 1 - October 2023

October 16 - 24, 2023 - 3281 U.S. Adults



## 21A. Battery B - Describe Women — A strong leader

Now, we'd like to ask you how well some phrases describe different kinds of people in society. How well does each of these describe most women ?

*Shown to a random 1/3 of respondents*

|              | Total   | Gender |        | Age   |       |       |       | Race  |       |          |
|--------------|---------|--------|--------|-------|-------|-------|-------|-------|-------|----------|
|              |         | Male   | Female | 18-29 | 30-44 | 45-64 | 65+   | White | Black | Hispanic |
| Extremely    | 14%     | 12%    | 15%    | 18%   | 13%   | 13%   | 10%   | 12%   | 20%   | 12%      |
| Very         | 27%     | 23%    | 31%    | 19%   | 25%   | 28%   | 38%   | 26%   | 30%   | 32%      |
| Moderately   | 43%     | 46%    | 40%    | 47%   | 36%   | 46%   | 43%   | 46%   | 36%   | 39%      |
| Slightly     | 11%     | 13%    | 9%     | 10%   | 17%   | 8%    | 7%    | 10%   | 9%    | 12%      |
| Not at all   | 5%      | 6%     | 5%     | 6%    | 9%    | 5%    | 1%    | 6%    | 5%    | 5%       |
| Totals       | 100%    | 100%   | 100%   | 100%  | 100%  | 100%  | 99%   | 100%  | 100%  | 100%     |
| Unweighted N | (1,082) | (470)  | (612)  | (237) | (230) | (385) | (230) | (440) | (441) | (141)    |

|              | Total   | Party ID |       |       | Registered Voters |  | Region    |         |       |       |
|--------------|---------|----------|-------|-------|-------------------|--|-----------|---------|-------|-------|
|              |         | Dem      | Rep   | Ind   | Voters            |  | Northeast | Midwest | South | West  |
| Extremely    | 14%     | 15%      | 13%   | 11%   | 14%               |  | 12%       | 13%     | 13%   | 17%   |
| Very         | 27%     | 33%      | 30%   | 24%   | 28%               |  | 28%       | 24%     | 28%   | 30%   |
| Moderately   | 43%     | 41%      | 43%   | 44%   | 43%               |  | 44%       | 48%     | 45%   | 33%   |
| Slightly     | 11%     | 9%       | 7%    | 14%   | 10%               |  | 12%       | 6%      | 11%   | 13%   |
| Not at all   | 5%      | 1%       | 7%    | 7%    | 5%                |  | 4%        | 8%      | 4%    | 7%    |
| Totals       | 100%    | 99%      | 100%  | 100%  | 100%              |  | 100%      | 99%     | 101%  | 100%  |
| Unweighted N | (1,082) | (458)    | (233) | (271) | (801)             |  | (193)     | (234)   | (471) | (184) |

# TASS - Wave 1 - October 2023

October 16 - 24, 2023 - 3281 U.S. Adults



## 21B. Battery B - Describe Women — Smart

Now, we'd like to ask you how well some phrases describe different kinds of people in society. How well does each of these describe most women ?

*Shown to a random 1/3 of respondents*

|              | Total   | Gender |        | Age   |       |       |       | Race  |       |          |
|--------------|---------|--------|--------|-------|-------|-------|-------|-------|-------|----------|
|              |         | Male   | Female | 18-29 | 30-44 | 45-64 | 65+   | White | Black | Hispanic |
| Extremely    | 16%     | 12%    | 20%    | 17%   | 15%   | 15%   | 18%   | 13%   | 23%   | 21%      |
| Very         | 41%     | 39%    | 42%    | 37%   | 33%   | 44%   | 48%   | 44%   | 38%   | 36%      |
| Moderately   | 36%     | 41%    | 31%    | 37%   | 42%   | 35%   | 29%   | 37%   | 31%   | 32%      |
| Slightly     | 4%      | 5%     | 4%     | 4%    | 5%    | 5%    | 3%    | 4%    | 4%    | 7%       |
| Not at all   | 3%      | 3%     | 3%     | 5%    | 5%    | 1%    | 1%    | 2%    | 4%    | 4%       |
| Totals       | 100%    | 100%   | 100%   | 100%  | 100%  | 100%  | 99%   | 100%  | 100%  | 100%     |
| Unweighted N | (1,086) | (472)  | (614)  | (238) | (230) | (386) | (232) | (441) | (444) | (140)    |

|              | Total   | Party ID |       |       | Registered Voters |  | Region    |         |       |       |
|--------------|---------|----------|-------|-------|-------------------|--|-----------|---------|-------|-------|
|              |         | Dem      | Rep   | Ind   | Voters            |  | Northeast | Midwest | South | West  |
| Extremely    | 16%     | 18%      | 17%   | 16%   | 17%               |  | 20%       | 11%     | 18%   | 16%   |
| Very         | 41%     | 46%      | 42%   | 36%   | 41%               |  | 39%       | 42%     | 39%   | 44%   |
| Moderately   | 36%     | 29%      | 35%   | 42%   | 36%               |  | 37%       | 38%     | 36%   | 32%   |
| Slightly     | 4%      | 6%       | 5%    | 1%    | 4%                |  | 3%        | 4%      | 5%    | 5%    |
| Not at all   | 3%      | 1%       | 1%    | 5%    | 2%                |  | 2%        | 4%      | 2%    | 3%    |
| Totals       | 100%    | 100%     | 100%  | 100%  | 100%              |  | 101%      | 99%     | 100%  | 100%  |
| Unweighted N | (1,086) | (462)    | (234) | (270) | (805)             |  | (193)     | (234)   | (473) | (186) |

# TASS - Wave 1 - October 2023

October 16 - 24, 2023 - 3281 U.S. Adults



## 21C. Battery B - Describe Women — Honest

Now, we'd like to ask you how well some phrases describe different kinds of people in society. How well does each of these describe most women ?

*Shown to a random 1/3 of respondents*

|              | Total   | Gender |        | Age   |       |       |       | Race  |       |          |
|--------------|---------|--------|--------|-------|-------|-------|-------|-------|-------|----------|
|              |         | Male   | Female | 18-29 | 30-44 | 45-64 | 65+   | White | Black | Hispanic |
| Extremely    | 11%     | 10%    | 12%    | 15%   | 11%   | 9%    | 12%   | 10%   | 18%   | 13%      |
| Very         | 32%     | 34%    | 31%    | 28%   | 23%   | 36%   | 42%   | 34%   | 31%   | 33%      |
| Moderately   | 41%     | 38%    | 44%    | 36%   | 43%   | 46%   | 37%   | 42%   | 38%   | 37%      |
| Slightly     | 10%     | 12%    | 9%     | 17%   | 12%   | 7%    | 7%    | 10%   | 8%    | 11%      |
| Not at all   | 5%      | 6%     | 3%     | 4%    | 10%   | 2%    | 2%    | 4%    | 5%    | 6%       |
| Totals       | 99%     | 100%   | 99%    | 100%  | 99%   | 100%  | 100%  | 100%  | 100%  | 100%     |
| Unweighted N | (1,087) | (472)  | (615)  | (238) | (231) | (387) | (231) | (441) | (444) | (141)    |

|              | Total   | Party ID |       |       | Registered Voters |  | Region    |         |       |       |
|--------------|---------|----------|-------|-------|-------------------|--|-----------|---------|-------|-------|
|              |         | Dem      | Rep   | Ind   | Voters            |  | Northeast | Midwest | South | West  |
| Extremely    | 11%     | 12%      | 12%   | 10%   | 12%               |  | 14%       | 9%      | 10%   | 15%   |
| Very         | 32%     | 36%      | 39%   | 26%   | 34%               |  | 29%       | 37%     | 32%   | 30%   |
| Moderately   | 41%     | 42%      | 35%   | 46%   | 41%               |  | 39%       | 41%     | 43%   | 41%   |
| Slightly     | 10%     | 7%       | 11%   | 12%   | 10%               |  | 12%       | 9%      | 11%   | 8%    |
| Not at all   | 5%      | 2%       | 3%    | 7%    | 3%                |  | 5%        | 5%      | 4%    | 6%    |
| Totals       | 99%     | 99%      | 100%  | 101%  | 100%              |  | 99%       | 101%    | 100%  | 100%  |
| Unweighted N | (1,087) | (462)    | (234) | (271) | (806)             |  | (193)     | (236)   | (473) | (185) |

# TASS - Wave 1 - October 2023

October 16 - 24, 2023 - 3281 U.S. Adults



## 21D. Battery B - Describe Women — Cares about other people

Now, we'd like to ask you how well some phrases describe different kinds of people in society. How well does each of these describe most women ?

*Shown to a random 1/3 of respondents*

|              | Total   | Gender |        | Age   |       |       |       | Race  |       |          |
|--------------|---------|--------|--------|-------|-------|-------|-------|-------|-------|----------|
|              |         | Male   | Female | 18-29 | 30-44 | 45-64 | 65+   | White | Black | Hispanic |
| Extremely    | 17%     | 13%    | 20%    | 13%   | 16%   | 20%   | 17%   | 15%   | 25%   | 15%      |
| Very         | 41%     | 43%    | 40%    | 36%   | 35%   | 45%   | 49%   | 43%   | 36%   | 44%      |
| Moderately   | 33%     | 34%    | 32%    | 38%   | 37%   | 29%   | 30%   | 34%   | 30%   | 31%      |
| Slightly     | 5%      | 6%     | 5%     | 7%    | 7%    | 4%    | 3%    | 5%    | 5%    | 6%       |
| Not at all   | 4%      | 4%     | 3%     | 5%    | 6%    | 2%    | 1%    | 3%    | 4%    | 4%       |
| Totals       | 100%    | 100%   | 100%   | 99%   | 101%  | 100%  | 100%  | 100%  | 100%  | 100%     |
| Unweighted N | (1,085) | (473)  | (612)  | (236) | (230) | (387) | (232) | (441) | (443) | (140)    |

|              | Total   | Party ID |       |       | Registered Voters |  | Region    |         |       |       |
|--------------|---------|----------|-------|-------|-------------------|--|-----------|---------|-------|-------|
|              |         | Dem      | Rep   | Ind   | Voters            |  | Northeast | Midwest | South | West  |
| Extremely    | 17%     | 19%      | 19%   | 12%   | 18%               |  | 19%       | 12%     | 18%   | 17%   |
| Very         | 41%     | 44%      | 42%   | 41%   | 42%               |  | 35%       | 49%     | 41%   | 38%   |
| Moderately   | 33%     | 32%      | 29%   | 38%   | 32%               |  | 38%       | 28%     | 34%   | 33%   |
| Slightly     | 5%      | 2%       | 9%    | 5%    | 5%                |  | 5%        | 6%      | 4%    | 7%    |
| Not at all   | 4%      | 3%       | 2%    | 4%    | 2%                |  | 2%        | 5%      | 3%    | 5%    |
| Totals       | 100%    | 100%     | 101%  | 100%  | 99%               |  | 99%       | 100%    | 100%  | 100%  |
| Unweighted N | (1,085) | (462)    | (233) | (271) | (804)             |  | (193)     | (234)   | (472) | (186) |

# TASS - Wave 1 - October 2023

October 16 - 24, 2023 - 3281 U.S. Adults



## 21E. Battery B - Describe Women — Likable

Now, we'd like to ask you how well some phrases describe different kinds of people in society. How well does each of these describe most women ?

*Shown to a random 1/3 of respondents*

|              | Total   | Gender |        | Age   |       |       |       | Race  |       |          |
|--------------|---------|--------|--------|-------|-------|-------|-------|-------|-------|----------|
|              |         | Male   | Female | 18-29 | 30-44 | 45-64 | 65+   | White | Black | Hispanic |
| Extremely    | 14%     | 12%    | 15%    | 14%   | 15%   | 12%   | 15%   | 12%   | 18%   | 16%      |
| Very         | 35%     | 40%    | 30%    | 38%   | 31%   | 35%   | 38%   | 35%   | 34%   | 38%      |
| Moderately   | 41%     | 40%    | 42%    | 36%   | 40%   | 45%   | 41%   | 43%   | 36%   | 35%      |
| Slightly     | 6%      | 4%     | 8%     | 7%    | 6%    | 6%    | 5%    | 6%    | 7%    | 5%       |
| Not at all   | 4%      | 4%     | 4%     | 5%    | 8%    | 3%    | 1%    | 4%    | 4%    | 6%       |
| Totals       | 100%    | 100%   | 99%    | 100%  | 100%  | 101%  | 100%  | 100%  | 99%   | 100%     |
| Unweighted N | (1,085) | (472)  | (613)  | (237) | (230) | (387) | (231) | (443) | (441) | (140)    |

|              | Total   | Party ID |       |       | Registered Voters |  | Region    |         |       |       |
|--------------|---------|----------|-------|-------|-------------------|--|-----------|---------|-------|-------|
|              |         | Dem      | Rep   | Ind   | Voters            |  | Northeast | Midwest | South | West  |
| Extremely    | 14%     | 15%      | 15%   | 12%   | 15%               |  | 20%       | 10%     | 13%   | 14%   |
| Very         | 35%     | 35%      | 39%   | 33%   | 35%               |  | 28%       | 34%     | 35%   | 40%   |
| Moderately   | 41%     | 42%      | 36%   | 45%   | 40%               |  | 42%       | 44%     | 41%   | 36%   |
| Slightly     | 6%      | 6%       | 7%    | 3%    | 6%                |  | 8%        | 5%      | 7%    | 3%    |
| Not at all   | 4%      | 1%       | 3%    | 7%    | 4%                |  | 2%        | 6%      | 3%    | 6%    |
| Totals       | 100%    | 99%      | 100%  | 100%  | 100%              |  | 100%      | 99%     | 99%   | 99%   |
| Unweighted N | (1,085) | (458)    | (235) | (272) | (804)             |  | (193)     | (234)   | (472) | (186) |

# TASS - Wave 1 - October 2023

## October 16 - 24, 2023 - 3281 U.S. Adults



### 21F. Battery B - Describe Women — Mean

Now, we'd like to ask you how well some phrases describe different kinds of people in society. How well does each of these describe most women ?

*Shown to a random 1/3 of respondents*

|              | Total   | Gender |        | Age   |       |       |       | Race  |       |          |
|--------------|---------|--------|--------|-------|-------|-------|-------|-------|-------|----------|
|              |         | Male   | Female | 18-29 | 30-44 | 45-64 | 65+   | White | Black | Hispanic |
| Extremely    | 6%      | 7%     | 6%     | 13%   | 7%    | 5%    | 0%    | 5%    | 9%    | 10%      |
| Very         | 13%     | 15%    | 12%    | 17%   | 20%   | 9%    | 8%    | 12%   | 17%   | 17%      |
| Moderately   | 36%     | 33%    | 39%    | 33%   | 37%   | 40%   | 32%   | 35%   | 36%   | 37%      |
| Slightly     | 27%     | 29%    | 26%    | 24%   | 26%   | 26%   | 35%   | 31%   | 23%   | 21%      |
| Not at all   | 17%     | 16%    | 18%    | 13%   | 9%    | 20%   | 25%   | 18%   | 15%   | 15%      |
| Totals       | 99%     | 100%   | 101%   | 100%  | 99%   | 100%  | 100%  | 101%  | 100%  | 100%     |
| Unweighted N | (1,087) | (472)  | (615)  | (238) | (230) | (388) | (231) | (442) | (443) | (141)    |

|              | Total   | Party ID |       |       | Registered Voters |  | Region    |         |       |       |
|--------------|---------|----------|-------|-------|-------------------|--|-----------|---------|-------|-------|
|              |         | Dem      | Rep   | Ind   | Voters            |  | Northeast | Midwest | South | West  |
| Extremely    | 6%      | 8%       | 6%    | 5%    | 5%                |  | 4%        | 3%      | 8%    | 9%    |
| Very         | 13%     | 12%      | 18%   | 9%    | 13%               |  | 13%       | 9%      | 14%   | 16%   |
| Moderately   | 36%     | 31%      | 35%   | 41%   | 34%               |  | 32%       | 47%     | 34%   | 33%   |
| Slightly     | 27%     | 25%      | 27%   | 31%   | 30%               |  | 31%       | 26%     | 27%   | 26%   |
| Not at all   | 17%     | 24%      | 14%   | 15%   | 18%               |  | 21%       | 15%     | 17%   | 15%   |
| Totals       | 99%     | 100%     | 100%  | 101%  | 100%              |  | 101%      | 100%    | 100%  | 99%   |
| Unweighted N | (1,087) | (461)    | (235) | (271) | (806)             |  | (192)     | (235)   | (474) | (186) |

# TASS - Wave 1 - October 2023

October 16 - 24, 2023 - 3281 U.S. Adults



## 22A. Battery B - Describe the President — A strong leader

Now, please consider the best possible President of the United States. How well does each of these describe the best possible President?

*Shown to a random 1/3 of respondents*

|              | Total   | Gender |        | Age   |       |       |       | Race  |       |          |
|--------------|---------|--------|--------|-------|-------|-------|-------|-------|-------|----------|
|              |         | Male   | Female | 18-29 | 30-44 | 45-64 | 65+   | White | Black | Hispanic |
| Extremely    | 59%     | 59%    | 58%    | 42%   | 53%   | 66%   | 71%   | 66%   | 40%   | 48%      |
| Very         | 23%     | 26%    | 21%    | 25%   | 24%   | 22%   | 23%   | 22%   | 27%   | 28%      |
| Moderately   | 12%     | 10%    | 13%    | 22%   | 14%   | 7%    | 5%    | 9%    | 21%   | 16%      |
| Slightly     | 3%      | 1%     | 5%     | 6%    | 4%    | 2%    | 1%    | 2%    | 6%    | 4%       |
| Not at all   | 3%      | 3%     | 3%     | 5%    | 4%    | 2%    | 0%    | 2%    | 6%    | 4%       |
| Totals       | 100%    | 99%    | 100%   | 100%  | 99%   | 99%   | 100%  | 101%  | 100%  | 100%     |
| Unweighted N | (1,081) | (465)  | (616)  | (235) | (229) | (387) | (230) | (439) | (440) | (141)    |

|              | Total   | Party ID |       |       | Registered Voters |  | Region    |         |       |       |
|--------------|---------|----------|-------|-------|-------------------|--|-----------|---------|-------|-------|
|              |         | Dem      | Rep   | Ind   | Voters            |  | Northeast | Midwest | South | West  |
| Extremely    | 59%     | 53%      | 68%   | 60%   | 62%               |  | 56%       | 58%     | 60%   | 60%   |
| Very         | 23%     | 29%      | 21%   | 20%   | 24%               |  | 25%       | 21%     | 23%   | 25%   |
| Moderately   | 12%     | 13%      | 6%    | 13%   | 10%               |  | 14%       | 14%     | 10%   | 10%   |
| Slightly     | 3%      | 3%       | 2%    | 2%    | 2%                |  | 3%        | 3%      | 3%    | 4%    |
| Not at all   | 3%      | 1%       | 2%    | 5%    | 2%                |  | 2%        | 3%      | 4%    | 2%    |
| Totals       | 100%    | 99%      | 99%   | 100%  | 100%              |  | 100%      | 99%     | 100%  | 101%  |
| Unweighted N | (1,081) | (457)    | (233) | (270) | (801)             |  | (192)     | (232)   | (473) | (184) |



# TASS - Wave 1 - October 2023

October 16 - 24, 2023 - 3281 U.S. Adults



## 22B. Battery B - Describe the President — Smart

Now, please consider the best possible President of the United States. How well does each of these describe the best possible President?

*Shown to a random 1/3 of respondents*

|              | Total   | Gender |        | Age   |       |       |       | Race  |       |          |
|--------------|---------|--------|--------|-------|-------|-------|-------|-------|-------|----------|
|              |         | Male   | Female | 18-29 | 30-44 | 45-64 | 65+   | White | Black | Hispanic |
| Extremely    | 47%     | 48%    | 45%    | 37%   | 44%   | 51%   | 54%   | 53%   | 35%   | 36%      |
| Very         | 35%     | 33%    | 37%    | 30%   | 35%   | 36%   | 40%   | 37%   | 32%   | 37%      |
| Moderately   | 13%     | 14%    | 13%    | 24%   | 14%   | 10%   | 6%    | 8%    | 22%   | 18%      |
| Slightly     | 2%      | 1%     | 3%     | 3%    | 3%    | 2%    | 0%    | 1%    | 5%    | 6%       |
| Not at all   | 3%      | 4%     | 2%     | 6%    | 4%    | 2%    | 1%    | 2%    | 6%    | 3%       |
| Totals       | 100%    | 100%   | 100%   | 100%  | 100%  | 101%  | 101%  | 101%  | 100%  | 100%     |
| Unweighted N | (1,082) | (469)  | (613)  | (235) | (230) | (389) | (228) | (439) | (442) | (140)    |

|              | Total   | Party ID |       |       | Registered Voters |  | Region    |         |       |       |
|--------------|---------|----------|-------|-------|-------------------|--|-----------|---------|-------|-------|
|              |         | Dem      | Rep   | Ind   | Voters            |  | Northeast | Midwest | South | West  |
| Extremely    | 47%     | 46%      | 52%   | 46%   | 50%               |  | 42%       | 47%     | 47%   | 51%   |
| Very         | 35%     | 34%      | 40%   | 34%   | 37%               |  | 42%       | 35%     | 34%   | 31%   |
| Moderately   | 13%     | 16%      | 6%    | 14%   | 10%               |  | 14%       | 10%     | 14%   | 15%   |
| Slightly     | 2%      | 2%       | 1%    | 2%    | 2%                |  | 1%        | 2%      | 3%    | 1%    |
| Not at all   | 3%      | 2%       | 1%    | 4%    | 2%                |  | 2%        | 4%      | 3%    | 2%    |
| Totals       | 100%    | 100%     | 100%  | 100%  | 101%              |  | 101%      | 98%     | 101%  | 100%  |
| Unweighted N | (1,082) | (459)    | (235) | (268) | (801)             |  | (193)     | (233)   | (473) | (183) |

# TASS - Wave 1 - October 2023

October 16 - 24, 2023 - 3281 U.S. Adults



## 22C. Battery B - Describe the President — Honest

Now, please consider the best possible President of the United States. How well does each of these describe the best possible President?

*Shown to a random 1/3 of respondents*

|              | Total   | Gender |        | Age   |       |       |       | Race  |       |          |
|--------------|---------|--------|--------|-------|-------|-------|-------|-------|-------|----------|
|              |         | Male   | Female | 18-29 | 30-44 | 45-64 | 65+   | White | Black | Hispanic |
| Extremely    | 48%     | 52%    | 45%    | 36%   | 44%   | 51%   | 62%   | 53%   | 38%   | 39%      |
| Very         | 30%     | 28%    | 31%    | 27%   | 32%   | 29%   | 30%   | 31%   | 26%   | 28%      |
| Moderately   | 15%     | 15%    | 15%    | 24%   | 16%   | 14%   | 7%    | 12%   | 19%   | 23%      |
| Slightly     | 4%      | 3%     | 5%     | 7%    | 3%    | 3%    | 1%    | 2%    | 9%    | 6%       |
| Not at all   | 3%      | 3%     | 4%     | 6%    | 6%    | 3%    | 0%    | 2%    | 9%    | 5%       |
| Totals       | 100%    | 101%   | 100%   | 100%  | 101%  | 100%  | 100%  | 100%  | 101%  | 101%     |
| Unweighted N | (1,082) | (466)  | (616)  | (235) | (230) | (388) | (229) | (441) | (440) | (141)    |

|              | Total   | Party ID |       |       | Registered Voters |  | Region    |         |       |       |
|--------------|---------|----------|-------|-------|-------------------|--|-----------|---------|-------|-------|
|              |         | Dem      | Rep   | Ind   | Voters            |  | Northeast | Midwest | South | West  |
| Extremely    | 48%     | 46%      | 58%   | 44%   | 51%               |  | 51%       | 49%     | 47%   | 48%   |
| Very         | 30%     | 32%      | 26%   | 33%   | 30%               |  | 31%       | 23%     | 31%   | 34%   |
| Moderately   | 15%     | 15%      | 13%   | 12%   | 13%               |  | 13%       | 20%     | 13%   | 15%   |
| Slightly     | 4%      | 4%       | 2%    | 4%    | 3%                |  | 2%        | 3%      | 5%    | 2%    |
| Not at all   | 3%      | 2%       | 1%    | 6%    | 3%                |  | 3%        | 4%      | 4%    | 2%    |
| Totals       | 100%    | 99%      | 100%  | 99%   | 100%              |  | 100%      | 99%     | 100%  | 101%  |
| Unweighted N | (1,082) | (456)    | (235) | (270) | (801)             |  | (191)     | (234)   | (473) | (184) |

**TASS - Wave 1 - October 2023**  
**October 16 - 24, 2023 - 3281 U.S. Adults**



**22D. Battery B - Describe the President — Cares about other people**

Now, please consider the best possible President of the United States. How well does each of these describe the best possible President?

*Shown to a random 1/3 of respondents*

|              | Total   | Gender |        | Age   |       |       |       | Race  |       |          |
|--------------|---------|--------|--------|-------|-------|-------|-------|-------|-------|----------|
|              |         | Male   | Female | 18-29 | 30-44 | 45-64 | 65+   | White | Black | Hispanic |
| Extremely    | 47%     | 45%    | 49%    | 39%   | 43%   | 48%   | 58%   | 50%   | 39%   | 44%      |
| Very         | 31%     | 34%    | 29%    | 36%   | 24%   | 34%   | 32%   | 33%   | 25%   | 29%      |
| Moderately   | 16%     | 17%    | 15%    | 15%   | 25%   | 14%   | 10%   | 14%   | 22%   | 19%      |
| Slightly     | 3%      | 2%     | 3%     | 5%    | 3%    | 2%    | 0%    | 1%    | 6%    | 4%       |
| Not at all   | 3%      | 3%     | 3%     | 6%    | 5%    | 2%    | 0%    | 2%    | 7%    | 3%       |
| Totals       | 100%    | 101%   | 99%    | 101%  | 100%  | 100%  | 100%  | 100%  | 99%   | 99%      |
| Unweighted N | (1,083) | (468)  | (615)  | (235) | (231) | (387) | (230) | (440) | (442) | (140)    |

|              | Total   | Party ID |       |       | Registered Voters |  | Region    |         |       |       |
|--------------|---------|----------|-------|-------|-------------------|--|-----------|---------|-------|-------|
|              |         | Dem      | Rep   | Ind   | Voters            |  | Northeast | Midwest | South | West  |
| Extremely    | 47%     | 55%      | 45%   | 43%   | 49%               |  | 46%       | 51%     | 45%   | 48%   |
| Very         | 31%     | 29%      | 39%   | 29%   | 32%               |  | 29%       | 31%     | 33%   | 30%   |
| Moderately   | 16%     | 12%      | 14%   | 20%   | 15%               |  | 19%       | 12%     | 16%   | 18%   |
| Slightly     | 3%      | 3%       | 1%    | 3%    | 2%                |  | 3%        | 3%      | 2%    | 3%    |
| Not at all   | 3%      | 2%       | 1%    | 4%    | 2%                |  | 2%        | 3%      | 4%    | 2%    |
| Totals       | 100%    | 101%     | 100%  | 99%   | 100%              |  | 99%       | 100%    | 100%  | 101%  |
| Unweighted N | (1,083) | (458)    | (235) | (270) | (802)             |  | (193)     | (232)   | (473) | (185) |

# TASS - Wave 1 - October 2023

October 16 - 24, 2023 - 3281 U.S. Adults



## 22E. Battery B - Describe the President — Likable

Now, please consider the best possible President of the United States. How well does each of these describe the best possible President?

*Shown to a random 1/3 of respondents*

|              | Total   | Gender |        | Age   |       |       |       | Race  |       |          |
|--------------|---------|--------|--------|-------|-------|-------|-------|-------|-------|----------|
|              |         | Male   | Female | 18-29 | 30-44 | 45-64 | 65+   | White | Black | Hispanic |
| Extremely    | 24%     | 25%    | 23%    | 20%   | 25%   | 24%   | 26%   | 24%   | 25%   | 27%      |
| Very         | 36%     | 36%    | 36%    | 35%   | 33%   | 35%   | 41%   | 38%   | 35%   | 32%      |
| Moderately   | 30%     | 28%    | 33%    | 33%   | 28%   | 31%   | 30%   | 31%   | 27%   | 31%      |
| Slightly     | 6%      | 7%     | 5%     | 7%    | 7%    | 6%    | 2%    | 5%    | 6%    | 7%       |
| Not at all   | 4%      | 4%     | 3%     | 5%    | 7%    | 3%    | 0%    | 3%    | 7%    | 3%       |
| Totals       | 100%    | 100%   | 100%   | 100%  | 100%  | 99%   | 99%   | 101%  | 100%  | 100%     |
| Unweighted N | (1,083) | (467)  | (616)  | (236) | (230) | (388) | (229) | (439) | (442) | (141)    |

|              | Total   | Party ID |       |       | Registered Voters |  | Region    |         |       |       |
|--------------|---------|----------|-------|-------|-------------------|--|-----------|---------|-------|-------|
|              |         | Dem      | Rep   | Ind   | Voters            |  | Northeast | Midwest | South | West  |
| Extremely    | 24%     | 27%      | 24%   | 19%   | 25%               |  | 25%       | 25%     | 23%   | 24%   |
| Very         | 36%     | 40%      | 39%   | 32%   | 35%               |  | 37%       | 30%     | 36%   | 41%   |
| Moderately   | 30%     | 26%      | 28%   | 38%   | 32%               |  | 32%       | 37%     | 30%   | 23%   |
| Slightly     | 6%      | 5%       | 8%    | 4%    | 6%                |  | 4%        | 5%      | 7%    | 6%    |
| Not at all   | 4%      | 1%       | 1%    | 7%    | 3%                |  | 2%        | 4%      | 4%    | 5%    |
| Totals       | 100%    | 99%      | 100%  | 100%  | 101%              |  | 100%      | 101%    | 100%  | 99%   |
| Unweighted N | (1,083) | (457)    | (235) | (270) | (801)             |  | (192)     | (233)   | (473) | (185) |

# TASS - Wave 1 - October 2023

October 16 - 24, 2023 - 3281 U.S. Adults



## 22F. Battery B - Describe the President — Mean

Now, please consider the best possible President of the United States. How well does each of these describe the best possible President?

*Shown to a random 1/3 of respondents*

|              | Total   | Gender |        | Age   |       |       |       | Race  |       |          |
|--------------|---------|--------|--------|-------|-------|-------|-------|-------|-------|----------|
|              |         | Male   | Female | 18-29 | 30-44 | 45-64 | 65+   | White | Black | Hispanic |
| Extremely    | 5%      | 6%     | 4%     | 11%   | 7%    | 2%    | 1%    | 4%    | 7%    | 6%       |
| Very         | 10%     | 11%    | 8%     | 16%   | 14%   | 6%    | 3%    | 7%    | 14%   | 17%      |
| Moderately   | 24%     | 26%    | 22%    | 33%   | 24%   | 25%   | 13%   | 19%   | 28%   | 30%      |
| Slightly     | 27%     | 24%    | 30%    | 21%   | 29%   | 27%   | 30%   | 30%   | 18%   | 23%      |
| Not at all   | 35%     | 33%    | 37%    | 19%   | 26%   | 40%   | 53%   | 39%   | 32%   | 23%      |
| Totals       | 101%    | 100%   | 101%   | 100%  | 100%  | 100%  | 100%  | 99%   | 99%   | 99%      |
| Unweighted N | (1,082) | (469)  | (613)  | (233) | (233) | (387) | (229) | (439) | (441) | (141)    |

|              | Total   | Party ID |       |       | Registered Voters |  | Region    |         |       |       |
|--------------|---------|----------|-------|-------|-------------------|--|-----------|---------|-------|-------|
|              |         | Dem      | Rep   | Ind   | Voters            |  | Northeast | Midwest | South | West  |
| Extremely    | 5%      | 5%       | 5%    | 4%    | 4%                |  | 3%        | 3%      | 6%    | 6%    |
| Very         | 10%     | 12%      | 12%   | 6%    | 9%                |  | 11%       | 8%      | 8%    | 12%   |
| Moderately   | 24%     | 19%      | 27%   | 22%   | 22%               |  | 22%       | 25%     | 24%   | 23%   |
| Slightly     | 27%     | 19%      | 32%   | 31%   | 28%               |  | 26%       | 30%     | 27%   | 25%   |
| Not at all   | 35%     | 45%      | 25%   | 36%   | 37%               |  | 39%       | 33%     | 35%   | 33%   |
| Totals       | 101%    | 100%     | 101%  | 99%   | 100%              |  | 101%      | 99%     | 100%  | 99%   |
| Unweighted N | (1,082) | (457)    | (235) | (269) | (801)             |  | (194)     | (232)   | (472) | (184) |

**23. Importance of Women in Political Office**

How important is it that more women be elected to political office?

|                      | Total   | Gender  |         | Age   |       |         |       | Race    |         |          |
|----------------------|---------|---------|---------|-------|-------|---------|-------|---------|---------|----------|
|                      |         | Male    | Female  | 18-29 | 30-44 | 45-64   | 65+   | White   | Black   | Hispanic |
| Not at all important | 15%     | 19%     | 10%     | 10%   | 16%   | 16%     | 16%   | 18%     | 7%      | 11%      |
| Slightly important   | 15%     | 17%     | 14%     | 21%   | 11%   | 16%     | 14%   | 15%     | 13%     | 15%      |
| Moderately important | 32%     | 33%     | 30%     | 34%   | 33%   | 31%     | 29%   | 32%     | 32%     | 32%      |
| Very important       | 21%     | 19%     | 24%     | 19%   | 20%   | 23%     | 24%   | 20%     | 27%     | 26%      |
| Extremely important  | 17%     | 12%     | 21%     | 17%   | 19%   | 16%     | 17%   | 16%     | 22%     | 16%      |
| Totals               | 100%    | 100%    | 99%     | 101%  | 99%   | 102%    | 100%  | 101%    | 101%    | 100%     |
| Unweighted N         | (3,274) | (1,403) | (1,871) | (732) | (699) | (1,149) | (694) | (1,328) | (1,346) | (410)    |

  

|                      | Total   | Party ID |       |       | Registered Voters<br>Voters | Region    |         |         |       |
|----------------------|---------|----------|-------|-------|-----------------------------|-----------|---------|---------|-------|
|                      |         | Dem      | Rep   | Ind   |                             | Northeast | Midwest | South   | West  |
| Not at all important | 15%     | 4%       | 23%   | 18%   | 15%                         | 14%       | 16%     | 14%     | 15%   |
| Slightly important   | 15%     | 13%      | 21%   | 14%   | 15%                         | 15%       | 14%     | 16%     | 15%   |
| Moderately important | 32%     | 26%      | 33%   | 33%   | 28%                         | 32%       | 33%     | 33%     | 28%   |
| Very important       | 21%     | 27%      | 15%   | 23%   | 22%                         | 19%       | 21%     | 22%     | 23%   |
| Extremely important  | 17%     | 32%      | 8%    | 12%   | 20%                         | 19%       | 17%     | 15%     | 19%   |
| Totals               | 100%    | 102%     | 100%  | 100%  | 100%                        | 99%       | 101%    | 100%    | 100%  |
| Unweighted N         | (3,274) | (1,396)  | (660) | (855) | (2,410)                     | (593)     | (616)   | (1,444) | (621) |

**24. Support Corporations Reducing Gender Gaps**

Do you support or oppose the following policy? Require corporations to show that they're not engaging in gender-based pay discrimination and fine companies that fail to close their gender-based pay gaps.

|                            | Total   | Gender  |         | Age   |       |         |       | Race    |         |          |
|----------------------------|---------|---------|---------|-------|-------|---------|-------|---------|---------|----------|
|                            |         | Male    | Female  | 18-29 | 30-44 | 45-64   | 65+   | White   | Black   | Hispanic |
| Strongly oppose            | 9%      | 13%     | 5%      | 8%    | 9%    | 9%      | 11%   | 10%     | 5%      | 7%       |
| Oppose                     | 8%      | 10%     | 7%      | 13%   | 9%    | 7%      | 7%    | 9%      | 6%      | 10%      |
| Neither support nor oppose | 34%     | 37%     | 32%     | 37%   | 39%   | 36%     | 24%   | 34%     | 36%     | 39%      |
| Support                    | 27%     | 24%     | 31%     | 28%   | 21%   | 28%     | 33%   | 28%     | 27%     | 28%      |
| Strongly support           | 21%     | 16%     | 25%     | 15%   | 22%   | 20%     | 26%   | 20%     | 27%     | 16%      |
| Totals                     | 99%     | 100%    | 100%    | 101%  | 100%  | 100%    | 101%  | 101%    | 101%    | 100%     |
| Unweighted N               | (3,270) | (1,402) | (1,868) | (727) | (699) | (1,149) | (695) | (1,327) | (1,343) | (409)    |

|                            | Total   | Party ID |       |       | Registered Voters<br>Voters | Region    |         |         |       |
|----------------------------|---------|----------|-------|-------|-----------------------------|-----------|---------|---------|-------|
|                            |         | Dem      | Rep   | Ind   |                             | Northeast | Midwest | South   | West  |
| Strongly oppose            | 9%      | 3%       | 12%   | 13%   | 10%                         | 11%       | 8%      | 9%      | 10%   |
| Oppose                     | 8%      | 5%       | 11%   | 10%   | 9%                          | 8%        | 8%      | 10%     | 6%    |
| Neither support nor oppose | 34%     | 24%      | 38%   | 35%   | 29%                         | 33%       | 34%     | 35%     | 34%   |
| Support                    | 27%     | 36%      | 27%   | 22%   | 28%                         | 27%       | 28%     | 28%     | 26%   |
| Strongly support           | 21%     | 32%      | 12%   | 20%   | 23%                         | 21%       | 22%     | 18%     | 24%   |
| Totals                     | 99%     | 100%     | 100%  | 100%  | 99%                         | 100%      | 100%    | 100%    | 100%  |
| Unweighted N               | (3,270) | (1,393)  | (660) | (854) | (2,405)                     | (591)     | (614)   | (1,446) | (619) |

**25. U.S. Should Ban Social Media Platforms**

How likely are you to support a politician that advocates banning certain social media platforms in the interest of national security?

|                             | Total   | Gender  |         | Age   |       |         |       | Race    |         |          |
|-----------------------------|---------|---------|---------|-------|-------|---------|-------|---------|---------|----------|
|                             |         | Male    | Female  | 18-29 | 30-44 | 45-64   | 65+   | White   | Black   | Hispanic |
| Very unlikely               | 9%      | 10%     | 8%      | 8%    | 8%    | 9%      | 10%   | 9%      | 8%      | 9%       |
| Unlikely                    | 8%      | 8%      | 8%      | 9%    | 6%    | 8%      | 10%   | 8%      | 8%      | 6%       |
| Somewhat unlikely           | 9%      | 9%      | 9%      | 14%   | 12%   | 6%      | 6%    | 9%      | 8%      | 11%      |
| Neither unlikely nor likely | 31%     | 29%     | 33%     | 30%   | 39%   | 31%     | 24%   | 30%     | 37%     | 32%      |
| Somewhat likely             | 17%     | 18%     | 17%     | 22%   | 15%   | 14%     | 21%   | 17%     | 17%     | 20%      |
| Likely                      | 12%     | 12%     | 12%     | 9%    | 8%    | 14%     | 16%   | 12%     | 13%     | 10%      |
| Very likely                 | 14%     | 14%     | 14%     | 9%    | 12%   | 17%     | 14%   | 15%     | 9%      | 13%      |
| Totals                      | 100%    | 100%    | 101%    | 101%  | 100%  | 99%     | 101%  | 100%    | 100%    | 101%     |
| Unweighted N                | (3,278) | (1,406) | (1,872) | (733) | (700) | (1,149) | (696) | (1,329) | (1,349) | (409)    |

|                             | Total   | Party ID |       |       | Registered Voters | Region    |         |         |       |
|-----------------------------|---------|----------|-------|-------|-------------------|-----------|---------|---------|-------|
|                             |         | Dem      | Rep   | Ind   | Voters            | Northeast | Midwest | South   | West  |
| Very unlikely               | 9%      | 10%      | 8%    | 7%    | 9%                | 8%        | 9%      | 9%      | 10%   |
| Unlikely                    | 8%      | 10%      | 6%    | 9%    | 8%                | 7%        | 9%      | 6%      | 11%   |
| Somewhat unlikely           | 9%      | 9%       | 7%    | 11%   | 10%               | 8%        | 10%     | 9%      | 10%   |
| Neither unlikely nor likely | 31%     | 30%      | 25%   | 34%   | 28%               | 35%       | 32%     | 31%     | 27%   |
| Somewhat likely             | 17%     | 20%      | 17%   | 16%   | 17%               | 19%       | 17%     | 17%     | 16%   |
| Likely                      | 12%     | 11%      | 15%   | 11%   | 12%               | 10%       | 9%      | 13%     | 12%   |
| Very likely                 | 14%     | 10%      | 22%   | 12%   | 15%               | 14%       | 14%     | 14%     | 13%   |
| Totals                      | 100%    | 100%     | 100%  | 100%  | 99%               | 101%      | 100%    | 99%     | 99%   |
| Unweighted N                | (3,278) | (1,395)  | (660) | (857) | (2,410)           | (593)     | (620)   | (1,446) | (619) |



**26. U.S. Should Inspect Social Media Content**

To what extent do you agree or disagree with the following statement? U.S. authorities should more frequently inspect content on social media platforms in the interest of national security.

|                            | Total   | Gender  |         | Age   |       |         |       | Race    |         |          |
|----------------------------|---------|---------|---------|-------|-------|---------|-------|---------|---------|----------|
|                            |         | Male    | Female  | 18-29 | 30-44 | 45-64   | 65+   | White   | Black   | Hispanic |
| Strongly disagree          | 7%      | 10%     | 3%      | 5%    | 7%    | 7%      | 7%    | 7%      | 4%      | 4%       |
| Disagree                   | 7%      | 9%      | 5%      | 8%    | 6%    | 7%      | 7%    | 8%      | 4%      | 4%       |
| Somewhat disagree          | 7%      | 6%      | 8%      | 11%   | 7%    | 7%      | 5%    | 7%      | 6%      | 10%      |
| Neither agree nor disagree | 27%     | 24%     | 29%     | 29%   | 34%   | 25%     | 20%   | 25%     | 30%     | 30%      |
| Somewhat agree             | 23%     | 24%     | 23%     | 24%   | 23%   | 22%     | 25%   | 24%     | 23%     | 21%      |
| Agree                      | 16%     | 15%     | 18%     | 14%   | 11%   | 18%     | 22%   | 17%     | 17%     | 16%      |
| Strongly agree             | 12%     | 11%     | 14%     | 10%   | 11%   | 14%     | 14%   | 12%     | 15%     | 14%      |
| Totals                     | 99%     | 99%     | 100%    | 101%  | 99%   | 100%    | 100%  | 100%    | 99%     | 99%      |
| Unweighted N               | (3,268) | (1,401) | (1,867) | (728) | (699) | (1,147) | (694) | (1,325) | (1,345) | (409)    |

|                            | Total   | Party ID |       |       | Registered Voters | Region    |         |         |       |
|----------------------------|---------|----------|-------|-------|-------------------|-----------|---------|---------|-------|
|                            |         | Dem      | Rep   | Ind   | Voters            | Northeast | Midwest | South   | West  |
| Strongly disagree          | 7%      | 4%       | 6%    | 9%    | 7%                | 7%        | 7%      | 5%      | 8%    |
| Disagree                   | 7%      | 5%       | 6%    | 10%   | 7%                | 6%        | 7%      | 7%      | 8%    |
| Somewhat disagree          | 7%      | 8%       | 7%    | 6%    | 8%                | 7%        | 10%     | 7%      | 6%    |
| Neither agree nor disagree | 27%     | 24%      | 24%   | 26%   | 23%               | 24%       | 24%     | 28%     | 29%   |
| Somewhat agree             | 23%     | 25%      | 24%   | 24%   | 24%               | 22%       | 26%     | 24%     | 21%   |
| Agree                      | 16%     | 19%      | 19%   | 13%   | 18%               | 16%       | 15%     | 17%     | 17%   |
| Strongly agree             | 12%     | 14%      | 14%   | 12%   | 14%               | 17%       | 12%     | 12%     | 11%   |
| Totals                     | 99%     | 99%      | 100%  | 100%  | 101%              | 99%       | 101%    | 100%    | 100%  |
| Unweighted N               | (3,268) | (1,391)  | (655) | (856) | (2,404)           | (590)     | (616)   | (1,442) | (620) |

**27. U.S. Should Prosecute Foreign Software**

To what extent do you agree or disagree with the following statement? The federal government should prosecute American citizens who use banned foreign software.

|                            | Total   | Gender  |         | Age   |       |         |       | Race    |         |          |
|----------------------------|---------|---------|---------|-------|-------|---------|-------|---------|---------|----------|
|                            |         | Male    | Female  | 18-29 | 30-44 | 45-64   | 65+   | White   | Black   | Hispanic |
| Strongly disagree          | 9%      | 12%     | 5%      | 9%    | 12%   | 7%      | 7%    | 9%      | 5%      | 7%       |
| Disagree                   | 9%      | 10%     | 8%      | 10%   | 7%    | 7%      | 12%   | 10%     | 7%      | 8%       |
| Somewhat disagree          | 9%      | 9%      | 9%      | 13%   | 9%    | 8%      | 7%    | 9%      | 7%      | 10%      |
| Neither agree nor disagree | 32%     | 26%     | 37%     | 30%   | 36%   | 32%     | 26%   | 29%     | 37%     | 39%      |
| Somewhat agree             | 18%     | 19%     | 17%     | 19%   | 16%   | 19%     | 19%   | 18%     | 19%     | 15%      |
| Agree                      | 14%     | 13%     | 14%     | 12%   | 12%   | 15%     | 17%   | 15%     | 16%     | 11%      |
| Strongly agree             | 10%     | 10%     | 10%     | 8%    | 9%    | 11%     | 12%   | 10%     | 10%     | 10%      |
| Totals                     | 101%    | 99%     | 100%    | 101%  | 101%  | 99%     | 100%  | 100%    | 101%    | 100%     |
| Unweighted N               | (3,263) | (1,402) | (1,861) | (724) | (696) | (1,147) | (696) | (1,325) | (1,338) | (409)    |

|                            | Total   | Party ID |       |       | Registered Voters | Region    |         |         |       |
|----------------------------|---------|----------|-------|-------|-------------------|-----------|---------|---------|-------|
|                            |         | Dem      | Rep   | Ind   |                   | Northeast | Midwest | South   | West  |
| Strongly disagree          | 9%      | 6%       | 8%    | 13%   | 9%                | 8%        | 9%      | 7%      | 11%   |
| Disagree                   | 9%      | 11%      | 7%    | 8%    | 9%                | 6%        | 11%     | 8%      | 10%   |
| Somewhat disagree          | 9%      | 10%      | 6%    | 12%   | 10%               | 11%       | 9%      | 9%      | 9%    |
| Neither agree nor disagree | 32%     | 32%      | 25%   | 30%   | 27%               | 31%       | 32%     | 30%     | 34%   |
| Somewhat agree             | 18%     | 21%      | 20%   | 16%   | 19%               | 20%       | 16%     | 20%     | 15%   |
| Agree                      | 14%     | 12%      | 19%   | 13%   | 16%               | 14%       | 13%     | 15%     | 13%   |
| Strongly agree             | 10%     | 9%       | 14%   | 9%    | 11%               | 10%       | 11%     | 10%     | 9%    |
| Totals                     | 101%    | 101%     | 99%   | 101%  | 101%              | 100%      | 101%    | 99%     | 101%  |
| Unweighted N               | (3,263) | (1,389)  | (660) | (850) | (2,400)           | (592)     | (616)   | (1,435) | (620) |

**28. Americans with Foreign Government Ties Should not be Eligible for Office**

To what extent do you support or oppose this statement? American citizens with family or business ties with foreign governments should become ineligible for political office.

|                            | Total   | Gender  |         | Age   |       |         |       | Race    |         |          |
|----------------------------|---------|---------|---------|-------|-------|---------|-------|---------|---------|----------|
|                            |         | Male    | Female  | 18-29 | 30-44 | 45-64   | 65+   | White   | Black   | Hispanic |
| Strongly oppose            | 6%      | 8%      | 4%      | 5%    | 6%    | 6%      | 7%    | 6%      | 6%      | 5%       |
| Oppose                     | 8%      | 9%      | 6%      | 10%   | 7%    | 6%      | 9%    | 9%      | 6%      | 6%       |
| Somewhat oppose            | 9%      | 9%      | 8%      | 14%   | 5%    | 9%      | 8%    | 9%      | 8%      | 9%       |
| Neither oppose nor support | 31%     | 27%     | 36%     | 35%   | 36%   | 29%     | 25%   | 27%     | 41%     | 42%      |
| Somewhat support           | 17%     | 16%     | 18%     | 17%   | 16%   | 16%     | 23%   | 17%     | 17%     | 15%      |
| Support                    | 13%     | 14%     | 13%     | 10%   | 14%   | 14%     | 14%   | 14%     | 13%     | 11%      |
| Strongly support           | 15%     | 16%     | 14%     | 9%    | 15%   | 20%     | 14%   | 17%     | 9%      | 11%      |
| Totals                     | 99%     | 99%     | 99%     | 100%  | 99%   | 100%    | 100%  | 99%     | 100%    | 99%      |
| Unweighted N               | (3,270) | (1,401) | (1,869) | (729) | (697) | (1,149) | (695) | (1,326) | (1,343) | (410)    |

|                            | Total   | Party ID |       |       | Registered Voters | Region    |         |         |       |
|----------------------------|---------|----------|-------|-------|-------------------|-----------|---------|---------|-------|
|                            |         | Dem      | Rep   | Ind   | Voters            | Northeast | Midwest | South   | West  |
| Strongly oppose            | 6%      | 7%       | 6%    | 6%    | 6%                | 5%        | 5%      | 6%      | 8%    |
| Oppose                     | 8%      | 8%       | 6%    | 9%    | 8%                | 7%        | 8%      | 6%      | 10%   |
| Somewhat oppose            | 9%      | 11%      | 6%    | 10%   | 9%                | 10%       | 9%      | 9%      | 8%    |
| Neither oppose nor support | 31%     | 30%      | 24%   | 31%   | 26%               | 29%       | 31%     | 32%     | 32%   |
| Somewhat support           | 17%     | 20%      | 17%   | 18%   | 19%               | 19%       | 17%     | 17%     | 17%   |
| Support                    | 13%     | 11%      | 19%   | 12%   | 14%               | 15%       | 15%     | 14%     | 9%    |
| Strongly support           | 15%     | 12%      | 22%   | 15%   | 18%               | 14%       | 15%     | 16%     | 16%   |
| Totals                     | 99%     | 99%      | 100%  | 101%  | 100%              | 99%       | 100%    | 100%    | 100%  |
| Unweighted N               | (3,270) | (1,393)  | (661) | (852) | (2,404)           | (592)     | (618)   | (1,441) | (619) |

**29. President and the Supreme Court on National Security**

To what extent do you support or oppose this statement? On matters relevant to national security, the President may ignore Supreme Court decisions.

|                            | Total   | Gender  |         | Age   |       |         |       | Race    |         |          |
|----------------------------|---------|---------|---------|-------|-------|---------|-------|---------|---------|----------|
|                            |         | Male    | Female  | 18-29 | 30-44 | 45-64   | 65+   | White   | Black   | Hispanic |
| Strongly oppose            | 23%     | 29%     | 18%     | 11%   | 16%   | 27%     | 37%   | 29%     | 13%     | 12%      |
| Oppose                     | 15%     | 16%     | 14%     | 11%   | 13%   | 18%     | 17%   | 17%     | 11%     | 12%      |
| Somewhat oppose            | 12%     | 11%     | 13%     | 14%   | 15%   | 11%     | 10%   | 12%     | 13%     | 11%      |
| Neither oppose nor support | 30%     | 25%     | 35%     | 37%   | 35%   | 28%     | 19%   | 24%     | 40%     | 41%      |
| Somewhat support           | 10%     | 9%      | 11%     | 13%   | 11%   | 7%      | 9%    | 9%      | 10%     | 14%      |
| Support                    | 6%      | 6%      | 6%      | 9%    | 5%    | 5%      | 5%    | 5%      | 9%      | 6%       |
| Strongly support           | 4%      | 4%      | 4%      | 4%    | 5%    | 3%      | 2%    | 4%      | 4%      | 4%       |
| Totals                     | 100%    | 100%    | 101%    | 99%   | 100%  | 99%     | 99%   | 100%    | 100%    | 100%     |
| Unweighted N               | (3,270) | (1,401) | (1,869) | (729) | (694) | (1,151) | (696) | (1,327) | (1,345) | (409)    |

|                            | Total   | Party ID |       |       | Registered Voters | Region    |         |         |       |
|----------------------------|---------|----------|-------|-------|-------------------|-----------|---------|---------|-------|
|                            |         | Dem      | Rep   | Ind   | Voters            | Northeast | Midwest | South   | West  |
| Strongly oppose            | 23%     | 18%      | 31%   | 27%   | 28%               | 20%       | 24%     | 23%     | 25%   |
| Oppose                     | 15%     | 13%      | 15%   | 19%   | 17%               | 16%       | 16%     | 14%     | 15%   |
| Somewhat oppose            | 12%     | 15%      | 13%   | 11%   | 12%               | 13%       | 14%     | 12%     | 10%   |
| Neither oppose nor support | 30%     | 31%      | 19%   | 30%   | 23%               | 32%       | 28%     | 29%     | 32%   |
| Somewhat support           | 10%     | 12%      | 12%   | 8%    | 10%               | 8%        | 11%     | 11%     | 9%    |
| Support                    | 6%      | 8%       | 6%    | 4%    | 6%                | 6%        | 4%      | 7%      | 5%    |
| Strongly support           | 4%      | 4%       | 6%    | 1%    | 4%                | 4%        | 3%      | 3%      | 4%    |
| Totals                     | 100%    | 101%     | 102%  | 100%  | 100%              | 99%       | 100%    | 99%     | 100%  |
| Unweighted N               | (3,270) | (1,393)  | (658) | (855) | (2,407)           | (591)     | (619)   | (1,443) | (617) |

**30. U.S. Should Limit Immigration from Unfriendly Nations**

To what extent do you support or oppose this statement? The federal government should more strictly limit immigration from unfriendly nations, such as China.

|                            | Total   | Gender  |         | Age   |       |         |       | Race    |         |          |
|----------------------------|---------|---------|---------|-------|-------|---------|-------|---------|---------|----------|
|                            |         | Male    | Female  | 18-29 | 30-44 | 45-64   | 65+   | White   | Black   | Hispanic |
| Strongly oppose            | 3%      | 4%      | 3%      | 4%    | 4%    | 3%      | 2%    | 3%      | 4%      | 4%       |
| Oppose                     | 6%      | 6%      | 6%      | 10%   | 6%    | 5%      | 5%    | 6%      | 5%      | 8%       |
| Somewhat oppose            | 8%      | 9%      | 8%      | 10%   | 10%   | 8%      | 6%    | 8%      | 9%      | 10%      |
| Neither oppose nor support | 27%     | 25%     | 30%     | 33%   | 33%   | 24%     | 20%   | 22%     | 37%     | 36%      |
| Somewhat support           | 16%     | 15%     | 17%     | 19%   | 16%   | 14%     | 16%   | 18%     | 18%     | 14%      |
| Support                    | 14%     | 15%     | 13%     | 13%   | 12%   | 16%     | 15%   | 14%     | 13%     | 14%      |
| Strongly support           | 24%     | 26%     | 23%     | 11%   | 19%   | 30%     | 35%   | 30%     | 14%     | 14%      |
| Totals                     | 98%     | 100%    | 100%    | 100%  | 100%  | 100%    | 99%   | 101%    | 100%    | 100%     |
| Unweighted N               | (3,264) | (1,400) | (1,864) | (727) | (696) | (1,147) | (694) | (1,324) | (1,343) | (408)    |

|                            | Total   | Party ID |       |       | Registered Voters |  | Region    |         |         |       |
|----------------------------|---------|----------|-------|-------|-------------------|--|-----------|---------|---------|-------|
|                            |         | Dem      | Rep   | Ind   | Voters            |  | Northeast | Midwest | South   | West  |
| Strongly oppose            | 3%      | 6%       | 1%    | 2%    | 4%                |  | 3%        | 3%      | 3%      | 5%    |
| Oppose                     | 6%      | 10%      | 2%    | 6%    | 7%                |  | 8%        | 6%      | 5%      | 7%    |
| Somewhat oppose            | 8%      | 13%      | 4%    | 9%    | 8%                |  | 10%       | 7%      | 9%      | 9%    |
| Neither oppose nor support | 27%     | 31%      | 14%   | 29%   | 22%               |  | 28%       | 29%     | 25%     | 28%   |
| Somewhat support           | 16%     | 17%      | 16%   | 16%   | 17%               |  | 17%       | 18%     | 17%     | 13%   |
| Support                    | 14%     | 13%      | 18%   | 13%   | 15%               |  | 11%       | 15%     | 15%     | 13%   |
| Strongly support           | 24%     | 11%      | 44%   | 25%   | 28%               |  | 23%       | 23%     | 26%     | 24%   |
| Totals                     | 98%     | 101%     | 99%   | 100%  | 101%              |  | 100%      | 101%    | 100%    | 99%   |
| Unweighted N               | (3,264) | (1,390)  | (657) | (853) | (2,401)           |  | (590)     | (619)   | (1,439) | (616) |
