# Supplementary material for: Liberties and Partisanship under Straining US-China Relations
Source: publisher site journal article supplement (doi:10.1515/spp-2025-0047), 2025-12-13
Supplement: Supplementary file 4 [file toplines_tass_wave1.pdf › suppmaterials_threats/toplines_tass_wave1.pdf]

# TASS - Wave 1 - October 2023

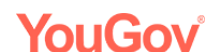

Sample 3281 U.S. Adults  
Conducted October 16 - 24, 2023  
Margin of Error  $\pm 2.3\%$

## 1. Choose the statement that best describes you, even if it is not exactly right. In general,...

I actively seek out news and information ..... 62%  
I bump into the news and information as I do other things or hear about it from others ... 38%

## 2. How much of the time do you think you can trust the media to report the news fairly?

Just about always ..... 5%  
Most of the time ..... 33%  
Only some of the time ..... 40%  
Almost never ..... 22%

## 3. How much of the time do you think you can trust the media to report the news accurately?

Just about always ..... 5%  
Most of the time ..... 34%  
Only some of the time ..... 42%  
Almost never ..... 19%

## 4. Which of the two statements do you think is most likely to be true?

California Governor Gavin Newsom recently vetoed a bill previously passed by the California Assembly that charges parents with child abuse for refusing to affirm their children's gender identity. .... 25%  
California Governor Gavin Newsom recently vetoed a bill previously passed by the California Assembly that requires judges in custody disputes to consider whether parents affirm their children's gender identity. .... 30%  
Unsure ..... 44%

## 5. Which of the two statements do you think is most likely to be true?

It was eventually announced that Donald Trump lost Maricopa County, Arizona in the 2020 Presidential Election. This was despite the efforts of Republican election officials in that county attempting to falsely show that Donald Trump had won. .... 32%  
It was eventually announced that Donald Trump lost Maricopa County, Arizona in the 2020 Presidential Election. This matched the conclusion of Republican officials in that county, who insisted from the beginning that Donald Trump had lost. .... 32%  
Unsure ..... 36%

## 6. Which of the two statements do you think is most likely to be true?

U.S. District Judge Aileen Cannon, who is overseeing one of Donald Trump's indictments and was appointed by Trump, has been forced by insiders to recuse herself from the case. ... 19%  
U.S. District Judge Aileen Cannon, who is overseeing one of Donald Trump's indictments and was appointed by Trump, is nonetheless allowed to continue overseeing the case. .... 44%  
Unsure ..... 37%

## 7. Which of the two statements do you think is most likely to be true?

A recent video showed Republican Missouri state senators using flamethrowers to burn books. .... 25%

A recent video showed Republican Missouri state senators using flamethrowers to burn empty boxes before auctioning them off. .... 18%

Unsure ..... 57%

## 8. Which of the two statements do you think is most likely to be true?

Congress has announced that they will not include Donald Trump on the 2024 ballot, even if he wins the GOP nomination. They will begin printing ballots, without Trump's name, in October 2023. .... 10%

Although some organizations are working to block Donald Trump from appearing on the 2024 ballot, Congress has not announced that they will print ballots without his name. Congress does not administer elections. .... 62%

Unsure ..... 27%

## 9. Thinking about the area within a mile of your place of residence, please indicate whether you agree or disagree with the following statements:

|                                                     | Strongly agree | Agree | Somewhat agree | Somewhat disagree | Disagree | Strongly disagree |
|-----------------------------------------------------|----------------|-------|----------------|-------------------|----------|-------------------|
| This area is a reflection of me                     | 8%             | 19%   | 30%            | 19%               | 13%      | 10%               |
| I don't really fit in with the people who live here | 8%             | 12%   | 22%            | 24%               | 21%      | 14%               |
| I would move somewhere else if I could              | 20%            | 18%   | 21%            | 16%               | 14%      | 11%               |
| This is my favorite place to be                     | 12%            | 22%   | 29%            | 18%               | 11%      | 9%                |
| I really miss it when I am away too long            | 13%            | 26%   | 29%            | 15%               | 10%      | 7%                |
| I feel happiest when I am here                      | 14%            | 27%   | 29%            | 15%               | 8%       | 7%                |

## 10. Please indicate how strongly you agree or disagree with the following statements:

|                                                                                             | Strongly agree | Agree | Somewhat agree | Somewhat disagree | Disagree | Strongly disagree |
|---------------------------------------------------------------------------------------------|----------------|-------|----------------|-------------------|----------|-------------------|
| Rural areas are boring and monotonous compared to life in other places                      | 6%             | 10%   | 24%            | 24%               | 20%      | 16%               |
| Big cities provide people with more opportunities to get ahead in life than other places do | 14%            | 26%   | 35%            | 15%               | 7%       | 5%                |

*continued on the next page ...*

*continued from previous page*

|                                                                                       |     |     |     |     |     |     |
|---------------------------------------------------------------------------------------|-----|-----|-----|-----|-----|-----|
| Big cities are dirty and noisy places to live compared to other places                | 19% | 24% | 32% | 14% | 8%  | 4%  |
| Rural areas are better places to raise children than other places                     | 20% | 21% | 30% | 19% | 6%  | 4%  |
| Big cities provide opportunities for new experiences that rural areas don't           | 17% | 32% | 33% | 10% | 3%  | 4%  |
| People from big cities are unfriendly and aggressive compared to other areas          | 10% | 17% | 31% | 22% | 13% | 7%  |
| Rural people are crude and uncultured compared with people living elsewhere           | 3%  | 8%  | 15% | 22% | 25% | 28% |
| People living in big cities have stressful lives compared to those living elsewhere   | 14% | 24% | 32% | 17% | 8%  | 4%  |
| People from small towns are suspicious and closed minded compared to people elsewhere | 5%  | 10% | 26% | 22% | 21% | 16% |

## 11. How would you rate each of the following in the place where you live now?

|                                                 | Excellent | Good | Only Fair | Poor |
|-------------------------------------------------|-----------|------|-----------|------|
| Job opportunities                               | 13%       | 43%  | 30%       | 13%  |
| Cost of housing and living expenses             | 9%        | 30%  | 35%       | 26%  |
| As a place to raise children                    | 21%       | 46%  | 23%       | 10%  |
| Low crime and safety                            | 17%       | 43%  | 25%       | 15%  |
| Quality of public schools                       | 15%       | 46%  | 26%       | 13%  |
| As a place where people look out for each other | 15%       | 43%  | 30%       | 12%  |

## 12. Do you agree or disagree with the following statements?

|                                                                                     | Strongly agree | Agree | Somewhat agree | Somewhat disagree | Disagree | Strongly disagree |
|-------------------------------------------------------------------------------------|----------------|-------|----------------|-------------------|----------|-------------------|
| I am angry that racism exists                                                       | 39%            | 29%   | 19%            | 7%                | 3%       | 3%                |
| White people in the U.S. have certain advantages because of the color of their skin | 22%            | 22%   | 19%            | 12%               | 12%      | 14%               |
| I often find myself fearful of people of other races                                | 4%             | 6%    | 15%            | 19%               | 28%      | 28%               |
| Racial problems in the U.S. are rare, isolated situations                           | 8%             | 11%   | 18%            | 20%               | 19%      | 24%               |

## 13. Have you voted in a recent presidential primary election or presidential caucus? Select all that apply.

|                  |     |
|------------------|-----|
| Yes, in 2020     | 58% |
| Yes, in 2016     | 46% |
| Yes, before 2016 | 40% |
| No, not lately   | 17% |
| No, not eligible | 9%  |
| Don't recall     | 9%  |

## 14. Regardless of whom you support, which Republican candidate do you think has the best chance of winning the party's nomination?

|                 |     |
|-----------------|-----|
| Chris Christie  | 4%  |
| Ron DeSantis    | 11% |
| Nikki Haley     | 8%  |
| Mike Pence      | 8%  |
| Vivek Ramaswamy | 3%  |
| Tim Scott       | 3%  |
| Donald Trump    | 57% |
| Somebody else   | 7%  |

## 15. If the presidential primary election or caucus in your state was being held today, for whom would you vote?

|                 |     |
|-----------------|-----|
| Chris Christie  | 3%  |
| Ron DeSantis    | 7%  |
| Nikki Haley     | 7%  |
| Mike Pence      | 5%  |
| Vivek Ramaswamy | 3%  |
| Tim Scott       | 2%  |
| Donald Trump    | 32% |
| Joe Biden       | 29% |
| Somebody else   | 10% |

16. Regardless of whom you support, which Democratic or Republican candidate do you think has the best chance of winning the general election in November of 2024 if nominated by his or her party?

|                       |     |
|-----------------------|-----|
| Chris Christie .....  | 2%  |
| Ron DeSantis .....    | 7%  |
| Nikki Haley .....     | 4%  |
| Mike Pence .....      | 4%  |
| Vivek Ramaswamy ..... | 2%  |
| Tim Scott .....       | 2%  |
| Donald Trump .....    | 38% |
| Joe Biden .....       | 34% |
| Somebody else .....   | 6%  |

17. Please tell us whether you agree or disagree with the following statement: Women seek to gain power by getting control over men.

*Shown to a random 2/3 of respondents*

|                         |     |
|-------------------------|-----|
| Strongly disagree ..... | 17% |
| Disagree .....          | 23% |
| Somewhat disagree ..... | 21% |
| Somewhat agree .....    | 24% |
| Agree .....             | 10% |
| Strongly agree .....    | 6%  |

18. Please tell us whether you agree or disagree with the following statement: Women should be cherished and protected by men.

*Shown to a random 2/3 of respondents*

|                         |     |
|-------------------------|-----|
| Strongly disagree ..... | 3%  |
| Disagree .....          | 5%  |
| Somewhat disagree ..... | 11% |
| Somewhat agree .....    | 30% |
| Agree .....             | 24% |
| Strongly agree .....    | 26% |

19. How often do women exaggerate problems they have at work?

*Shown to a random 2/3 of respondents*

|                 |     |
|-----------------|-----|
| Always .....    | 4%  |
| Often .....     | 18% |
| Sometimes ..... | 49% |
| Rarely .....    | 25% |
| Never .....     | 5%  |

20. Now, we'd like to ask you how well some phrases describe different kinds of people in society. How well does each of these describe most men?

*Shown to a random 1/3 of respondents*

|                          | Extremely | Very | Moderately | Slightly | Not at all |
|--------------------------|-----------|------|------------|----------|------------|
| A strong leader          | 13%       | 29%  | 43%        | 9%       | 5%         |
| Smart                    | 9%        | 29%  | 50%        | 8%       | 4%         |
| Honest                   | 7%        | 20%  | 49%        | 17%      | 7%         |
| Cares about other people | 8%        | 21%  | 48%        | 18%      | 6%         |
| Likable                  | 8%        | 25%  | 52%        | 11%      | 4%         |
| Mean                     | 6%        | 18%  | 39%        | 26%      | 11%        |

21. Now, we'd like to ask you how well some phrases describe different kinds of people in society. How well does each of these describe most women ?

*Shown to a random 1/3 of respondents*

|                          | Extremely | Very | Moderately | Slightly | Not at all |
|--------------------------|-----------|------|------------|----------|------------|
| A strong leader          | 14%       | 27%  | 43%        | 11%      | 5%         |
| Smart                    | 16%       | 41%  | 36%        | 4%       | 3%         |
| Honest                   | 11%       | 32%  | 41%        | 10%      | 5%         |
| Cares about other people | 17%       | 41%  | 33%        | 5%       | 4%         |
| Likable                  | 14%       | 35%  | 41%        | 6%       | 4%         |
| Mean                     | 6%        | 13%  | 36%        | 27%      | 17%        |

22. Now, please consider the best possible President of the United States. How well does each of these describe the best possible President?

*Shown to a random 1/3 of respondents*

|                          | Extremely | Very | Moderately | Slightly | Not at all |
|--------------------------|-----------|------|------------|----------|------------|
| A strong leader          | 59%       | 23%  | 12%        | 3%       | 3%         |
| Smart                    | 47%       | 35%  | 13%        | 2%       | 3%         |
| Honest                   | 48%       | 30%  | 15%        | 4%       | 3%         |
| Cares about other people | 47%       | 31%  | 16%        | 3%       | 3%         |
| Likable                  | 24%       | 36%  | 30%        | 6%       | 4%         |
| Mean                     | 5%        | 10%  | 24%        | 27%      | 35%        |

23. How important is it that more women be elected to political office?

|                      |     |
|----------------------|-----|
| Not at all important | 15% |
| Slightly important   | 15% |
| Moderately important | 32% |
| Very important       | 21% |
| Extremely important  | 17% |

24. Do you support or oppose the following policy? Require corporations to show that they're not engaging in gender-based pay discrimination and fine companies that fail to close their gender-based pay gaps.

|                            |     |
|----------------------------|-----|
| Strongly oppose            | 9%  |
| Oppose                     | 8%  |
| Neither support nor oppose | 34% |
| Support                    | 27% |
| Strongly support           | 21% |

25. How likely are you to support a politician that advocates banning certain social media platforms in the interest of national security?

|                             |     |
|-----------------------------|-----|
| Very unlikely               | 9%  |
| Unlikely                    | 8%  |
| Somewhat unlikely           | 9%  |
| Neither unlikely nor likely | 31% |
| Somewhat likely             | 17% |
| Likely                      | 12% |
| Very likely                 | 14% |

26. To what extent do you agree or disagree with the following statement? U.S. authorities should more frequently inspect content on social media platforms in the interest of national security.

|                            |     |
|----------------------------|-----|
| Strongly disagree          | 7%  |
| Disagree                   | 7%  |
| Somewhat disagree          | 7%  |
| Neither agree nor disagree | 27% |
| Somewhat agree             | 23% |
| Agree                      | 16% |
| Strongly agree             | 12% |

27. To what extent do you agree or disagree with the following statement? The federal government should prosecute American citizens who use banned foreign software.

|                            |     |
|----------------------------|-----|
| Strongly disagree          | 9%  |
| Disagree                   | 9%  |
| Somewhat disagree          | 9%  |
| Neither agree nor disagree | 32% |
| Somewhat agree             | 18% |
| Agree                      | 14% |
| Strongly agree             | 10% |

28. To what extent do you support or oppose this statement? American citizens with family or business ties with foreign governments should become ineligible for political office.

|                            |     |
|----------------------------|-----|
| Strongly oppose            | 6%  |
| Oppose                     | 8%  |
| Somewhat oppose            | 9%  |
| Neither oppose nor support | 31% |
| Somewhat support           | 17% |
| Support                    | 13% |
| Strongly support           | 15% |

29. To what extent do you support or oppose this statement? On matters relevant to national security, the President may ignore Supreme Court decisions.

|                            |     |
|----------------------------|-----|
| Strongly oppose            | 23% |
| Oppose                     | 15% |
| Somewhat oppose            | 12% |
| Neither oppose nor support | 30% |
| Somewhat support           | 10% |
| Support                    | 6%  |
| Strongly support           | 4%  |

30. To what extent do you support or oppose this statement? The federal government should more strictly limit immigration from unfriendly nations, such as China.

|                            |     |
|----------------------------|-----|
| Strongly oppose            | 3%  |
| Oppose                     | 6%  |
| Somewhat oppose            | 8%  |
| Neither oppose nor support | 27% |
| Somewhat support           | 16% |
| Support                    | 14% |
| Strongly support           | 24% |

31. Who did you vote for in the election for President in 2020?

|                            |     |
|----------------------------|-----|
| Joe Biden                  | 32% |
| Donald Trump               | 29% |
| Jo Jorgensen               | 0%  |
| Howie Hawkins              | 0%  |
| Other                      | 0%  |
| Did not vote for President | 38% |

32. Generally speaking, do you think of yourself as a ...?

|             |     |
|-------------|-----|
| Democrat    | 31% |
| Republican  | 28% |
| Independent | 30% |
| Other       | 3%  |
| Not sure    | 7%  |



## 33. Are you...?

|              |     |
|--------------|-----|
| Male .....   | 49% |
| Female ..... | 51% |

## 34. Respondent age by category

|                |     |
|----------------|-----|
| Under 30 ..... | 21% |
| 30-44 .....    | 25% |
| 45-64 .....    | 33% |
| 65+ .....      | 21% |

## 35. What racial or ethnic group best describes you?

|                |     |
|----------------|-----|
| White .....    | 63% |
| Black .....    | 12% |
| Hispanic ..... | 16% |
| Other .....    | 9%  |

## 36. What is the highest level of education you have completed?

|                    |     |
|--------------------|-----|
| HS or less .....   | 38% |
| Some college ..... | 28% |
| College grad ..... | 21% |
| Postgrad .....     | 12% |

## 37. Are you registered to vote?

|                      |     |
|----------------------|-----|
| Registered .....     | 71% |
| Not registered ..... | 29% |

## 38. In which census region do you live?

|                 |     |
|-----------------|-----|
| Northeast ..... | 17% |
| Midwest .....   | 21% |
| South .....     | 38% |
| West .....      | 24% |
